# Supplementary material for: Kub5-Hera RPRD1B Deficiency Promotes “BRCAness” and Vulnerability to PARP Inhibition in BRCA-proficient Breast Cancers
Source: Oxford University Press journal article supplement (doi:10.1158/1078-0432.ccr-17-1118), 2018-08-14
Supplement: 10780432ccr171118-sup-182094_3_supp_4936702_pcn620.xls [file 10780432ccr171118-sup-182094_3_supp_4936702_pcn620.xls]

## Sheet: TABLE S1A - DOWNREGULATED GENES
TABLE S1A. List of genes that are downregulated upon K-H knockdown in MDA-MB-231 cells identified by gene expression microarray. Asterisk indicates a gene that is represented in the dataset by more than one transcript.
Fold Change	ACCESSION	ARRAY_ADDRESS_ID	CHROMOSOME	CYTOBAND	DEFINITION	ENTREZ_GENE_ID	GI	ILMN_GENE	OBSOLETE_PROBE_ID	ONTOLOGY_COMPONENT	ONTOLOGY_FUNCTION	ONTOLOGY_PROCESS	PROBE_CHR_ORIENTATION	PROBE_COORDINATES	PROBE_ID	PROBE_SEQUENCE	PROBE_START	PROBE_TYPE	ProbeID	PROTEIN_PRODUCT	REFSEQ_ID	SEARCH_KEY	SOURCE	SOURCE_REFERENCE_ID	SPECIES	SYMBOL	SYNONYMS	TargetID	TRANSCRIPT	UNIGENE_ID
0.294533	NM_019624.2	6900241	12	12q24.31d	"Homo sapiens ATP-binding cassette, sub-family B (MDR/TAP), member 9 (ABCB9), transcript variant 2, mRNA."	23457	45243513	ABCB9*	TAPL; KIAA1520; EST122234	"The lipid bilayer surrounding the lysosome and separating its contents from the cell cytoplasm [goid 5765] [evidence IEA]; The irregular network of unit membranes, visible only by electron microscopy, that occurs in the cytoplasm of many eukaryotic cells. The membranes form a complex meshwork of tubular channels, which are often expanded into slitlike cavities called cisternae. The ER takes two …	"Interacting selectively with a nucleotide, any compound consisting of a nucleoside that is esterified with (ortho)phosphate or an oligophosphate at any hydroxyl group on the ribose or deoxyribose moiety [goid 166] [evidence IEA]; Enables the directed movement of substances (such as macromolecules, small molecules, ions) into, out of, within or between cells [goid 5215] [pmid 10748049] [evidence …	"The directed movement of oligopeptides into, out of, within or between cells. Oligopeptides are molecules that contain a small number (2 to 20) of amino-acid residues connected by peptide linkages [goid 6857] [evidence IEA]; The process of formation of spermatozoa, including spermatocytogenesis and spermiogenesis [goid 7283] [pmid 10748049] [evidence TAS]; The directed movement of proteins into,…	-	121979521-121979570	ILMN_2343048	AGCCCAGGATCTGGCTTTGCCAGAGGTTGCAACATGTTGAGAGAACCCGG	3298	A	6900241	NP_062570.1	NM_019624.2	NM_019624.2	RefSeq	NM_019624.2	Homo sapiens	ABCB9	TAPL; KIAA1520; EST122234	ABCB9	ILMN_10252
0.325855	NM_021215.3	5910392	20	20q11.23c	"Homo sapiens regulation of nuclear pre-mRNA domain containing 1B (RPRD1B), mRNA."	58490	149158720	RPRD1B	DKFZp434P0735; dJ1057B20.2				+	36153525-36153574	ILMN_3243461	CACCAAGGAAGTGCGATCTGAGCAGCCACAATCCAGCCAAAAGAGGATCG	3217	S	5910392	NP_067038.1	NM_021215.3	NM_021215.3	RefSeq	NM_021215.3	Homo sapiens	RPRD1B	CREPT; DKFZp434P0735; FLJ44520; dJ1057B20.2	RPRD1B	ILMN_29248
0.357677	NM_019624.2	5290598	12	12q24.31d	"Homo sapiens ATP-binding cassette, sub-family B (MDR/TAP), member 9 (ABCB9), transcript variant 2, mRNA."	23457	45243513	ABCB9*	TAPL; KIAA1520; EST122234	"The lipid bilayer surrounding the lysosome and separating its contents from the cell cytoplasm [goid 5765] [evidence IEA]; The irregular network of unit membranes, visible only by electron microscopy, that occurs in the cytoplasm of many eukaryotic cells. The membranes form a complex meshwork of tubular channels, which are often expanded into slitlike cavities called cisternae. The ER takes two …	"Interacting selectively with a nucleotide, any compound consisting of a nucleoside that is esterified with (ortho)phosphate or an oligophosphate at any hydroxyl group on the ribose or deoxyribose moiety [goid 166] [evidence IEA]; Enables the directed movement of substances (such as macromolecules, small molecules, ions) into, out of, within or between cells [goid 5215] [pmid 10748049] [evidence …	"The directed movement of oligopeptides into, out of, within or between cells. Oligopeptides are molecules that contain a small number (2 to 20) of amino-acid residues connected by peptide linkages [goid 6857] [evidence IEA]; The process of formation of spermatozoa, including spermatocytogenesis and spermiogenesis [goid 7283] [pmid 10748049] [evidence TAS]; The directed movement of proteins into,…	-	121979605-121979654	ILMN_2343047	GCCCCTGTGCTCTGCTGTCTGGAGGCCACGTGGATGTTCATGAGATGCAT	3214	A	5290598	NP_062570.1	NM_019624.2	NM_019624.2	RefSeq	NM_019624.2	Homo sapiens	ABCB9	TAPL; KIAA1520; EST122234	ABCB9	ILMN_10252
0.378587	NM_002281.2	430446	12	12q13.13d	"Homo sapiens keratin 81 (KRT81), mRNA."	3887	15431319	KRT81	KRTHB1; Hb-1; HB1; MLN137; hHAKB2-1; ghHkb1	"A filament composed of acidic and basic keratins (types I and II), typically expressed in epithelial cells. The keratins are the most diverse classes of IF proteins, with a large number of keratin isoforms being expressed. Each type of epithelium always expresses a characteristic combination of type I and type II keratins [goid 45095] [evidence IEA]"	The action of a molecule that contributes to the structural integrity of a complex or assembly within or outside a cell [goid 5198] [evidence IEA]; Interacting selectively with any protein or protein complex (a complex of two or more proteins that may include other nonprotein molecules) [goid 5515] [pmid 16189514] [evidence IPI]		-	50966078-50966127	ILMN_1801442	CAGTGGGAAAGGCCACCCTAGAAAGAAGTCCGCTGGCACCCATAGGAAGG	1746	S	430446	NP_002272.1	NM_002281.2	NM_002281.2	RefSeq	NM_002281.2	Homo sapiens	KRT81	KRTHB1; Hb-1; HB1; MLN137; hHAKB2-1; ghHkb1	KRT81	ILMN_635
0.395993	XM_001716882.1	1170575		12q24.11c	"PREDICTED: Homo sapiens similar to mCG49427 (LOC100129882), mRNA."	100129882	169204953	LOC100129882							ILMN_3268697	CCCAGCAGAATGGCTCCTGCAAAGAAGGGTGGCGAGAAGAAAAAGGGCCA	9	M	1170575	XP_001716934.1	XM_001716882.1	XM_001716882.1	RefSeq	XM_001716882.1	Homo sapiens	LOC100129882		LOC100129882	ILMN_348546
0.422963	XR_040891.1	2470128	16	16q24.1a	"PREDICTED: Homo sapiens misc_RNA (LOC729887), miscRNA."	729887	169210089	LOC729887					+	82708570-82708619	ILMN_3301740	GACACCGGTGCGTGCGAAACGGAGGACCTTTGTAACGCCACGTGTTTGCT	845	M	2470128		XR_040891.1	XR_040891.1	RefSeq	XR_040891.1	Homo sapiens	LOC729887		LOC729887	ILMN_343147
0.437807	NM_001042467.1	2120452	2	2q37.3b	"Homo sapiens melanophilin (MLPH), transcript variant 2, mRNA."	79083	109826350	MLPH	l(1)-3Rk; Slac-2a; SLAC2-A; ln; MGC2771; exophilin-3; MELPH; FLJ12145; l1Rk3	"All of the contents of a cell excluding the plasma membrane and nucleus, but including other subcellular structures [goid 5737] [evidence IEA]; The part of the cytoskeleton (the internal framework of a cell) composed of actin and associated proteins. Includes actin cytoskeleton-associated complexes [goid 15629] [evidence IEA]; A tissue-specific, membrane-bounded cytoplasmic organelle within whic…	"Interacting selectively with monomeric or multimeric forms of actin, including actin filaments [goid 3779] [evidence IEA]; Interacting selectively with any protein or protein complex (a complex of two or more proteins that may include other nonprotein molecules) [goid 5515] [evidence IEA]; Interacting selectively with zinc (Zn) ions [goid 8270] [evidence IEA]; Interacting selectively with Rab pr…	"The process of targeting specific proteins to particular membrane-bounded subcellular organelles. Usually requires an organelle specific protein sequence motif [goid 6605] [evidence IEA]; The directed movement of proteins in a cell, including the movement of proteins between specific compartments or structures within a cell, such as organelles of a eukaryotic cell [goid 6886] [evidence IEA]; The…	+	238127146-238127195	ILMN_1795342	TCCTGCACTGCTCACCTGGGTTTACTGATGACTCCTGGCTGCCCCACCAT	2118	S	2120452	NP_001035932.1	NM_001042467.1	NM_024101.4	RefSeq	NM_001042467.1	Homo sapiens	MLPH	SLAC2-A; MGC59733; MGC2771	MLPH	ILMN_170437
0.441232	NM_014736.4	5090754	15	15q22.31a	"Homo sapiens KIAA0101 (KIAA0101), transcript variant 1, mRNA."	9768	71773764	KIAA0101	L5; p15(PAF); OEATC1; OEATC-1; NS5ATP9				-	64669038-64669087	ILMN_2285996	AGGAGGGAACCCCGTTTGCGTGCGCCCAACTCCCAAGTGGCAAAAAGGAA	276	I	5090754	NP_055551.1	NM_014736.4	NM_014736.4	RefSeq	NM_014736.4	Homo sapiens	KIAA0101	L5; p15(PAF); OEATC1; OEATC-1; NS5ATP9	KIAA0101	ILMN_2026
0.466736	NM_001005413.1	3800474	10	10q21.1d	"Homo sapiens ZW10 interactor (ZWINT), transcript variant 3, mRNA."	11130	53729319	ZWINT*	HZwint-1; MGC117174; KNTC2AP	"A multisubunit complex that is located at the centromeric region of a condensed chromosome and provides an attachment point for the spindle microtubules [goid 777] [evidence IEA]; A membrane-bounded organelle of eukaryotic cells in which chromosomes are housed and replicated. In most cells, the nucleus contains all of the cell's chromosomes except the organellar chromosomes, and is the site of R…	"Interacting selectively with a protein N-terminus, the end of any peptide chain at which the 2-amino (or 2-imino) function of a constituent amino acid is not attached in peptide linkage to another amino-acid residue [goid 47485] [pmid 15485811] [evidence IPI]"	"The cell cycle process whereby replicated homologous chromosomes are organized and then physically separated and apportioned to two sets during the mitotic cell cycle. Each replicated chromosome, composed of two sister chromatids, aligns at the cell equator, paired with its homologous partner. One homolog of each morphologic type goes into each of the resulting chromosome sets [goid 70] [pmid 15…	-	58118155-58118178:58118179-58118204	ILMN_2362549	CCTGCTGGAGATGTAAATTTGCCATGACTTCCTGGAGGACAGCAGCATGG	704	A	3800474	NP_001005413.1	NM_001005413.1	NM_001005413.1	RefSeq	NM_001005413.1	Homo sapiens	ZWINT	HZwint-1; MGC117174; KNTC2AP	ZWINT	ILMN_23487
0.469628	NM_018492.2	3420554	8	8p21.1e	"Homo sapiens PDZ binding kinase (PBK), mRNA."	55872	18490990	PBK	Nori-3; SPK; FLJ14385; TOPK	"The part of a cell or its extracellular environment in which a gene product is located. A gene product may be located in one or more parts of a cell and its location may be as specific as a particular macromolecular complex, that is, a stable, persistent association of macromolecules that function together [goid 5575] [evidence ND ]"	"Interacting selectively with a nucleotide, any compound consisting of a nucleoside that is esterified with (ortho)phosphate or an oligophosphate at any hydroxyl group on the ribose or deoxyribose moiety [goid 166] [evidence IEA]; Catalysis of the reaction: ATP + a protein serine/threonine = ADP + protein serine/threonine phosphate [goid 4674] [pmid 10779557] [evidence TAS]; Interacting selective…	"The process of introducing a phosphate group on to a protein [goid 6468] [evidence NAS]; Progression through mitosis, the division of the eukaryotic cell nucleus to produce two daughter nuclei that, usually, contain the identical chromosome complement to their mother [goid 7067] [pmid 10779557] [evidence NAS]"	-	27723197-27723246	ILMN_1673673	GACTCTGGTTACAGATTGTCTTGATCTCTTGGATCTCCTCAGATCTTTGG	1664	S	3420554	NP_060962.2	NM_018492.2	NM_018492.2	RefSeq	NM_018492.2	Homo sapiens	PBK	Nori-3; SPK; FLJ14385; TOPK	PBK	ILMN_174875
0.470699	NM_030771.1	7040184	11	11p14.1d	"Homo sapiens coiled-coil domain containing 34 (CCDC34), transcript variant 1, mRNA."	91057	63054847	CCDC34	L15; NY-REN-41; RAMA3				-	27378993-27379042	ILMN_1657547	GCGCTTACCAGAAAGCCGCCTGACACCATGGGAGGTGTGGTTTATTGGCA	459	A	7040184	NP_110398.1	NM_030771.1	NM_030771.1	RefSeq	NM_030771.1	Homo sapiens	CCDC34	L15; NY-REN-41; RAMA3	CCDC34	ILMN_2645
0.473021	NM_016113.3	4390301	17	17p11.2i	"Homo sapiens transient receptor potential cation channel, subfamily V, member 2 (TRPV2), mRNA."	51393	22547178	TRPV2	VRL; VRL-1; MGC12549; VRL1	"The living contents of a cell; the matter contained within (but not including) the plasma membrane, usually taken to exclude large vacuoles and masses of secretory or ingested material. In eukaryotes it includes the nucleus and cytoplasm [goid 5622] [evidence IEA]; All of the contents of a cell excluding the plasma membrane and nucleus, but including other subcellular structures [goid 5737] [evi…	Catalysis of facilitated diffusion of a calcium (by an energy-independent process) involving passage through a transmembrane aqueous pore or channel without evidence for a carrier-mediated mechanism [goid 5262] [evidence IEA]; Interacting selectively with calcium ions (Ca2+) [goid 5509] [evidence IEA]	"The directed movement of charged atoms or small charged molecules into, out of, within or between cells [goid 6811] [evidence IEA]; The directed movement of calcium (Ca) ions into, out of, within or between cells [goid 6816] [evidence IEA]; The series of events required for an organism to receive a sensory stimulus, convert it to a molecular signal, and recognize and characterize the signal [goi…	+	16280844-16280893	ILMN_2049536	TGTCCTGGCTTCCCCTCCCAAGGAGGATGAGGATGGTGCCTCTGAGGAAA	2578	S	4390301	NP_057197.2	NM_016113.3	NM_016113.3	RefSeq	NM_016113.3	Homo sapiens	TRPV2	VRL; VRL-1; MGC12549; VRL1	TRPV2	ILMN_13262
0.474101	NM_001786.2	1050706	10	10q21.2a	"Homo sapiens cell division cycle 2, G1 to S and G2 to M (CDC2), transcript variant 1, mRNA."	983	16306490	CDC2*	DKFZp686L20222; CDK1; MGC111195; CDC28A	"A membrane-bounded organelle of eukaryotic cells in which chromosomes are housed and replicated. In most cells, the nucleus contains all of the cell's chromosomes except the organellar chromosomes, and is the site of RNA synthesis and processing. In some species, or in specialized cell types, RNA metabolism or DNA replication may be absent [goid 5634] [pmid 18029348] [evidence IDA]; A membrane-b…	"Interacting selectively with a nucleotide, any compound consisting of a nucleoside that is esterified with (ortho)phosphate or an oligophosphate at any hydroxyl group on the ribose or deoxyribose moiety [goid 166] [evidence IEA]; Catalysis of the reaction: ATP + a protein = ADP + a phosphoprotein; dependent on the binding of a regulatory cyclin subunit and full activity requires stimulatory phos…	"The process of introducing a phosphate group on to a protein [goid 6468] [evidence IEA]; A process which directly inhibits any of the steps required for cell death by apoptosis [goid 6916] [pmid 11069302] [evidence IDA]; The progression of biochemical and morphological phases and events that occur in a cell during successive cell replication or nuclear replication events. Canonically, the cell c…	+	62221918-62221967	ILMN_1747911	GGGCACTCCCAATAATGAAGTGTGGCCAGAAGTGGAATCTTTACAGGACT	789	A	1050706	NP_001777.1	NM_001786.2	NM_033379.2	RefSeq	NM_001786.2	Homo sapiens	CDC2	DKFZp686L20222; CDK1; MGC111195; CDC28A	CDC2	ILMN_24793
0.477323	NM_032621.2	4830674		Xq22.1e	"Homo sapiens brain expressed X-linked 2 (BEX2), mRNA."	84707	50658085	BEX2	BEX1; DJ79P11.1	"A membrane-bounded organelle of eukaryotic cells in which chromosomes are housed and replicated. In most cells, the nucleus contains all of the cell's chromosomes except the organellar chromosomes, and is the site of RNA synthesis and processing. In some species, or in specialized cell types, RNA metabolism or DNA replication may be absent [goid 5634] [evidence IEA]; All of the contents of a cel…			-	102564441-102564490	ILMN_2181892	AGGGAGACCCCTGCTTCCTAAACTTACACATTTGTGGTGTACCTTTGTCG	653	S	4830674	NP_116010.1	NM_032621.2	NM_032621.2	RefSeq	NM_032621.2	Homo sapiens	BEX2	BEX1; DJ79P11.1	BEX2	ILMN_24134
0.484334	NM_182513.1	5910349	19	19p13.2b	"Homo sapiens SPC24, NDC80 kinetochore complex component, homolog (S. cerevisiae) (SPC24), mRNA."	147841	32698865	SPC24	SPBC24; FLJ90806	"A multisubunit complex that is located at the centromeric region of a condensed chromosome and provides an attachment point for the spindle microtubules [goid 777] [evidence IEA]; A membrane-bounded organelle of eukaryotic cells in which chromosomes are housed and replicated. In most cells, the nucleus contains all of the cell's chromosomes except the organellar chromosomes, and is the site of R…	Interacting selectively with any protein or protein complex (a complex of two or more proteins that may include other nonprotein molecules) [goid 5515] [pmid 15961401] [evidence IPI]	"The progression of biochemical and morphological phases and events that occur in a cell during successive cell replication or nuclear replication events. Canonically, the cell cycle comprises the replication and segregation of genetic material followed by the division of the cell, but in endocycles or syncytial cells nuclear replication or nuclear division may not be followed by cell division [g…	-	11117635-11117684	ILMN_2181432	TAGAAGGCAGAGGCCGGCAGATCACTTGAGCCCAGGAGTTGGAGACCAGA	1774	S	5910349	NP_872319.1	NM_182513.1	NM_182513.1	RefSeq	NM_182513.1	Homo sapiens	SPC24	SPBC24; FLJ90806	SPC24	ILMN_174688
0.486475	NM_025047.1	3400209	3	3q26.1a	"Homo sapiens ADP-ribosylation factor-like 14 (ARL14), mRNA."	80117	13376573	ARL14	ARF7; FLJ22595	"The living contents of a cell; the matter contained within (but not including) the plasma membrane, usually taken to exclude large vacuoles and masses of secretory or ingested material. In eukaryotes it includes the nucleus and cytoplasm [goid 5622] [evidence IEA]"	"Interacting selectively with a nucleotide, any compound consisting of a nucleoside that is esterified with (ortho)phosphate or an oligophosphate at any hydroxyl group on the ribose or deoxyribose moiety [goid 166] [evidence IEA]; Interacting selectively with GTP, guanosine triphosphate [goid 5525] [evidence IEA]"	Any series of molecular signals in which a small monomeric GTPase relays one or more of the signals [goid 7264] [evidence IEA]	+	161878781-161878830	ILMN_2232463	GCTGTAACAGGTATTGAATTTCCACCGTGCTCCTATGTAACAGCTGGGTG	1141	S	3400209	NP_079323.1	NM_025047.1	NM_025047.1	RefSeq	NM_025047.1	Homo sapiens	ARL14	ARF7; FLJ22595	ARL14	ILMN_20812
0.489042	NM_199001.1	6450162			"Homo sapiens chromosome 9 open reading frame 169 (C9orf169), mRNA."	375791	39752686	C9ORF169							ILMN_1814106	CCTGATTACCTTAAGGCCCAGGCAATAAAGCAGGGTGATCTTCCTCCCAA	692	S	6450162	NP_945352.1	NM_199001.1	NM_199001.1	RefSeq	NM_199001.1	Homo sapiens	C9orf169		C9ORF169	ILMN_13120
0.492363	NM_080668.2	1400673	11	11q13.1c	"Homo sapiens cell division cycle associated 5 (CDCA5), mRNA."	113130	34147481	CDCA5	MGC16386	"A membrane-bounded organelle of eukaryotic cells in which chromosomes are housed and replicated. In most cells, the nucleus contains all of the cell's chromosomes except the organellar chromosomes, and is the site of RNA synthesis and processing. In some species, or in specialized cell types, RNA metabolism or DNA replication may be absent [goid 5634] [evidence ISS]; All of the contents of a cel…	"Interacting selectively with chromatin, the network of fibers of DNA and protein that make up the chromosomes of the eukaryotic nucleus during interphase [goid 3682] [pmid 15837422] [evidence TAS]; Interacting selectively with any protein or protein complex (a complex of two or more proteins that may include other nonprotein molecules) [goid 5515] [evidence ISS]"	"Progression from G1 phase to S phase of the mitotic cell cycle [goid 82] [pmid 15837422] [evidence IDA]; The progression of biochemical and morphological phases and events that occur in a cell during successive cell replication or nuclear replication events. Canonically, the cell cycle comprises the replication and segregation of genetic material followed by the division of the cell, but in endo…	-	64601683-64601732	ILMN_1683450	GCCTAGGTGTCCTTGAGCTGAACCGCACTGAAGAACTCTTGTCCTCACTG	2255	S	1400673	NP_542399.1	NM_080668.2	NM_080668.2	RefSeq	NM_080668.2	Homo sapiens	CDCA5	MGC16386	CDCA5	ILMN_3057
0.492835	NM_018518.3	7570181	10	10p13e	"Homo sapiens minichromosome maintenance complex component 10 (MCM10), transcript variant 2, mRNA."	55388	33383234	MCM10	PRO2249; CNA43; MGC126776				+	13252902-13252951	ILMN_2413898	AGTTGTATAATATGCTTGTAAAGGCTGAGGGTGAGCTGTATCTGGATGCC	4426	A	7570181	NP_060988.3	NM_018518.3	NM_018518.3	RefSeq	NM_018518.3	Homo sapiens	MCM10	PRO2249; CNA43; MGC126776	MCM10	ILMN_2483
0.495085	NM_004864.1	5090671	19	19p13.11c	"Homo sapiens growth differentiation factor 15 (GDF15), mRNA."	9518	4758935	GDF15	GDF-15; NAG-1; PTGFB; PDF; MIC1; PLAB; MIC-1	"The space external to the outermost structure of a cell. For cells without external protective or external encapsulating structures this refers to space outside of the plasma membrane. This term covers the host cell environment outside an intracellular parasite [goid 5576] [pmid 9326641] [evidence TAS]; That part of a multicellular organism outside the cells proper, usually taken to be outside t…	"Functions to control the survival, growth, differentiation and effector function of tissues and cells [goid 5125] [pmid 9326641] [evidence TAS]; The function that stimulates a cell to grow or proliferate. Most growth factors have other actions besides the induction of cell growth or proliferation [goid 8083] [evidence IEA]"	"The cascade of processes by which a signal interacts with a receptor, causing a change in the level or activity of a second messenger or other downstream target, and ultimately effecting a change in the functioning of the cell [goid 7165] [pmid 9326641] [evidence TAS]; The series of molecular signals generated as a consequence of a transforming growth factor beta receptor binding to one of its p…	+	18360697-18360745:18360746-18360746	ILMN_2188862	CCGGGGTGTCGCTCCAGACCTATGATGACTTGTTAGCCAAAGACTGCCAC	894	S	5090671	NP_004855.1	NM_004864.1	NM_004864.1	RefSeq	NM_004864.1	Homo sapiens	GDF15	PTGFB; GDF-15; PDF; NAG-1; MIC1; PLAB; MIC-1	GDF15	ILMN_2688
0.495848	NM_001062.3	1770603	11	11q12.1d	"Homo sapiens transcobalamin I (vitamin B12 binding protein, R binder family) (TCN1), mRNA."	6947	133987572	TCN1	TCI; TC1	The space external to the outermost structure of a cell. For cells without external protective or external encapsulating structures this refers to space outside of the plasma membrane. This term covers the host cell environment outside an intracellular parasite [goid 5576] [evidence IEA]	"Interacting selectively with ATP, adenosine 5'-triphosphate, a universally important coenzyme and enzyme regulator [goid 5524] [evidence IEA]; Catalysis of the transfer of cobalt (Co) ions from one side of a membrane to the other [goid 15087] [evidence IEA]; Catalysis of the reaction: ATP + H2O = ADP + phosphate. May or may not be coupled to another reaction [goid 16887] [evidence IEA]; Interact…	"The directed movement of charged atoms or small charged molecules into, out of, within or between cells [goid 6811] [evidence IEA]; The directed movement of cobalt (Co) ions into, out of, within or between cells [goid 6824] [evidence IEA]; The directed movement of cobalamin (vitamin B12), a water-soluble vitamin characterized by possession of a corrin nucleus containing a cobalt atom, into, out …	-	59620486-59620509:59620676-59620701	ILMN_1768469	TGAGTGGAGGCGAACCACTGAGCCAAGGAGCTGGTAGTTACGTTGTCCGC	1312	S	1770603	NP_001053.2	NM_001062.3	NM_001062.2	RefSeq	NM_001062.3	Homo sapiens	TCN1	TCI; TC1	TCN1	ILMN_13727
0.497327	NM_033199.3	4220437	3	3p21.31e	"Homo sapiens urocortin 2 (UCN2), mRNA."	90226	63053518	UCN2	SRP; URP; UCN-II; UCNI	The space external to the outermost structure of a cell. For cells without external protective or external encapsulating structures this refers to space outside of the plasma membrane. This term covers the host cell environment outside an intracellular parasite [goid 5576] [pmid 11329063] [evidence NAS]	"Interacting selectively with a G-protein-coupled receptor [goid 1664] [evidence IEA]; The action characteristic of a hormone, any substance formed in very small amounts in one specialized organ or group of cells and carried (sometimes in the bloodstream) to another organ or group of cells in the same organism, upon which it has a specific regulatory action. The term was originally applied to age…	"The chemical reactions and pathways resulting in the formation of the nucleotide cAMP (cyclic AMP, adenosine 3',5'-cyclophosphate) [goid 6171] [pmid 11329063] [evidence IEP]; A change in state or activity of a cell or an organism (in terms of movement, secretion, enzyme production, gene expression, etc.) as a result of a disturbance in organismal or cellular homeostasis, usually, but not necessa…	-	48599300-48599349	ILMN_1652413	GAGCTCCAACCAAACTCTGTCCCACTTCACGCACGGACTGTCCTGGGCAA	1286	S	4220437	NP_149976.1	NM_033199.3	NM_033199.3	RefSeq	NM_033199.3	Homo sapiens	UCN2	SRP; URP; UCN-II; UCNI	UCN2	ILMN_20791
0.499404	NM_198948.1	650347	7	7p22.2c	"Homo sapiens nudix (nucleoside diphosphate linked moiety X)-type motif 1 (NUDT1), transcript variant 2A, mRNA."	4521	40288275	NUDT1	MTH1		"Catalysis of the reaction: 8-oxo-7,8-dihydroguanine triphosphate = 8-oxo-7,8-dihydroguanine phosphate + diphosphate [goid 8413] [evidence IEA]; Catalysis of the hydrolysis of various bonds, e.g. C-O, C-N, C-C, phosphoric anhydride bonds, etc. Hydrolase is the systematic name for any enzyme of EC class 3 [goid 16787] [evidence IEA]; Catalysis of the reaction: GTP + H2O = GDP + phosphate [goid 392…	"The process of restoring DNA after damage. Genomes are subject to damage by chemical and physical agents in the environment (e.g. UV and ionizing radiations, chemical mutagens, fungal and bacterial toxins, etc.) and by free radicals or alkylating agents endogenously generated in metabolism. DNA is also damaged because of errors during its replication. A variety of different DNA repair pathways h…	+	2257112-2257161	ILMN_2330243	GGTCAGGACACCATCCTGGACTACACACTCCGCGAGGTGGACACGGTCTA	519	A	650347	NP_945186.1	NM_198948.1	NM_198948.1	RefSeq	NM_198948.1	Homo sapiens	NUDT1	MTH1	NUDT1	ILMN_8489
0.500766	NM_018454.5	1500553	15	15q15.1c	"Homo sapiens nucleolar and spindle associated protein 1 (NUSAP1), transcript variant 2, mRNA."	51203	59710090	NUSAP1	LNP; FLJ13421; SAPL; BM037; PRO0310p1; Q0310; ANKT	"A membrane-bounded organelle of eukaryotic cells in which chromosomes are housed and replicated. In most cells, the nucleus contains all of the cell's chromosomes except the organellar chromosomes, and is the site of RNA synthesis and processing. In some species, or in specialized cell types, RNA metabolism or DNA replication may be absent [goid 5634] [evidence IEA]; All of the contents of a cel…	Interacting selectively with DNA (deoxyribonucleic acid) [goid 3677] [evidence IEA]	"A cell cycle process that results in the division of the cytoplasm of a cell after mitosis, resulting in the separation of the original cell into two daughter cells [goid 281] [pmid 12963707] [evidence IDA]; The progression of biochemical and morphological phases and events that occur in a cell during successive cell replication or nuclear replication events. Canonically, the cell cycle comprise…	+	39460433-39460482	ILMN_1726720	CTAGGCTTTGCTTAGTATCATGTCCATGTTTCCTTCACCTCAGTGGAGCT	2167	A	1500553	NP_060924.4	NM_018454.5	NM_016359.2	RefSeq	NM_018454.5	Homo sapiens	NUSAP1	LNP; FLJ13421; SAPL; BM037; PRO0310p1; Q0310; ANKT	NUSAP1	ILMN_26193
0.501157	NM_198951.1	2940446	20	20q11.23c	"Homo sapiens transglutaminase 2 (C polypeptide, protein-glutamine-gamma-glutamyltransferase) (TGM2), transcript variant 2, mRNA."	7052	39777598	TGM2	TGC; TG2		"Catalysis of the transfer of a group, e.g. a methyl group, glycosyl group, acyl group, phosphorus-containing, or other groups, from one compound (generally regarded as the donor) to another compound (generally regarded as the acceptor). Transferase is the systematic name for any enzyme of EC class 2 [goid 16740] [evidence IEA]; Catalysis of the reaction: protein glutamine + alkylamine = protein …	"The formation of a covalent cross-link between or within protein chains [goid 18149] [evidence IEA]; The formation of a covalent cross-link between or within protein chains [goid 18149] [evidence IEA]; Any process that activates or increases the frequency, rate or extent of cell adhesion [goid 45785] [evidence ISS]"	-	36766459-36766482:36766483-36766508	ILMN_1679267	GCCCTGTGTTCCTGGAGCATTTGTTGACCGCCAACTGACAACATGCTAGG	1721	I	2940446	NP_945189.1	NM_198951.1	NM_198951.1	RefSeq	NM_198951.1	Homo sapiens	TGM2	TGC; TG2	TGM2	ILMN_8134
0.505101	NM_001354.4	5340129	10	10p15.1c	"Homo sapiens aldo-keto reductase family 1, member C2 (dihydrodiol dehydrogenase 2; bile acid binding protein; 3-alpha hydroxysteroid dehydrogenase, type III) (AKR1C2), transcript variant 1, mRNA. XM_943424 XM_943425 XM_943427"	1646	45446741	AKR1C2	BABP; HBAB; AKR1C-pseudo; DD; HAKRD; DD2; MCDR2; DDH2	"All of the contents of a cell excluding the plasma membrane and nucleus, but including other subcellular structures [goid 5737] [evidence IEA]"	"Catalysis of an oxidation-reduction (redox) reaction, a reversible chemical reaction in which the oxidation state of an atom or atoms within a molecule is altered. One substrate acts as a hydrogen or electron donor and becomes oxidized, while the other acts as hydrogen or electron acceptor and becomes reduced [goid 16491] [evidence IEA]; Interacting selectively with bile acids, any of a group of…	"The chemical reactions and pathways involving lipids, compounds soluble in an organic solvent but not, or sparingly, in an aqueous solvent. Includes fatty acids; neutral fats, other fatty-acid esters, and soaps; long-chain (fatty) alcohols and waxes; sphingoids and other long-chain bases; glycolipids, phospholipids and sphingolipids; and carotenes, polyprenols, sterols, terpenes and other isopre…	-	5036139-5036188	ILMN_2412336	CCTGCTTGGCGACTTCAGTAAGCTACAGCTAAGCCCATCGGCCGGAAAAG	1475	A	5340129	NP_001345.1	NM_001354.4	NM_001354.4	RefSeq	NM_001354.4	Homo sapiens	AKR1C2	BABP; HBAB; AKR1C-pseudo; DD; HAKRD; DD2; MCDR2; DDH2	AKR1C2	ILMN_13963
0.507135	NM_013277.2	2190010	12	12q13.13a	"Homo sapiens Rac GTPase activating protein 1 (RACGAP1), mRNA."	29127	21361396	RACGAP1	HsCYK-4; MgcRacGAP; ID-GAP	"A structure in the head of a spermatozoon that contains acid hydrolases, and is concerned with the breakdown of the outer membrane of the ovum during fertilization. It lies just beneath the plasma membrane and is derived from the lysosome [goid 1669] [evidence IEA]; The living contents of a cell; the matter contained within (but not including) the plasma membrane, usually taken to exclude large …	"Increases the activity of a GTPase, an enzyme that catalyzes the hydrolysis of GTP [goid 5096] [pmid 10979956] [evidence IDA]; Interacting selectively with a protein C-terminus, the end of any peptide chain at which the 1-carboxy function of a constituent amino acid is not attached in peptide linkage to another amino-acid residue [goid 8022] [pmid 11278976] [evidence IPI]; Interacting selectivel…	"A cellular process resulting in the division of the cytoplasm of a cell and its separation into two daughter cells. Cytokinesis usually occurs after growth, replication, and segregation of cellular components [goid 910] [pmid 11085985] [evidence IDA]; The process of formation of a ring composed of actin, myosin, and associated proteins that will function in cytokinesis [goid 915] [pmid 16129829]…	-	48669516-48669565	ILMN_2077550	CTTGGCCCCCATACCCCCAACCTTGTCCAGTGGAGCCCAACTTCTAAAGG	2875	S	2190010	NP_037409.2	NM_013277.2	NM_013277.2	RefSeq	NM_013277.2	Homo sapiens	RACGAP1	HsCYK-4; MgcRacGAP; ID-GAP	RACGAP1	ILMN_172963
0.510262	NM_001002876.1	1450192	22	22q13.2b	"Homo sapiens centromere protein M (CENPM), transcript variant 2, mRNA."	79019	50845413	CENPM	C22orf18; bK250D10.2; PANE1; MGC861; CENP-M	"The region of a chromosome that includes the centromere and associated proteins. In monocentric chromosomes, this region corresponds to a single area of the chromosome, whereas in holocentric chromosomes, it is evenly distributed along the chromosome [goid 775] [evidence IEA]; A multisubunit complex that is located at the centromeric region of a condensed chromosome and provides an attachment po…			-	42334830-42334879	ILMN_2368718	CAGCTGGCGAGACTGTAGCCCCCTCCCACTCCCACACTCACTCTTGCAGA	699	A	1450192	NP_001002876.1	NM_001002876.1	NM_001002876.1	RefSeq	NM_001002876.1	Homo sapiens	CENPM	C22orf18; bK250D10.2; PANE1; MGC861; CENP-M	CENPM	ILMN_12351
0.511801	NM_007370.3	4890731	12	12q24.23a	"Homo sapiens replication factor C (activator 1) 5, 36.5kDa (RFC5), transcript variant 1, mRNA."	5985	31795541	RFC5	MGC1155; RFC36	"A membrane-bounded organelle of eukaryotic cells in which chromosomes are housed and replicated. In most cells, the nucleus contains all of the cell's chromosomes except the organellar chromosomes, and is the site of RNA synthesis and processing. In some species, or in specialized cell types, RNA metabolism or DNA replication may be absent [goid 5634] [evidence IEA]; That part of the nuclear con…	"Interacting selectively with a nucleotide, any compound consisting of a nucleoside that is esterified with (ortho)phosphate or an oligophosphate at any hydroxyl group on the ribose or deoxyribose moiety [goid 166] [evidence IEA]; Catalysis of the reaction: ATP + H2O = ADP + phosphate to drive the opening of the ring structure of the PCNA complex, or any of the related sliding clamp complexes, an…	"The process whereby new strands of DNA are synthesized. The template for replication can either be an existing DNA molecule or RNA [goid 6260] [pmid 8999859] [evidence NAS]; The process whereby new strands of DNA are synthesized. The template for replication can either be an existing DNA molecule or RNA [goid 6260] [pmid 12791985] [evidence EXP]; The process of restoring DNA after damage. Genome…	+	116954126-116954175	ILMN_1659364	AAACGCACTTGTTTTCATGCAGGAGCGGGGCAAGTAAGGTTGAGCCTGAC	1806	A	4890731	NP_031396.1	NM_007370.3	NM_007370.3	RefSeq	NM_007370.3	Homo sapiens	RFC5	MGC1155; RFC36	RFC5	ILMN_16612
0.512333	NM_032117.2	7550730	4	4q31.3d	"Homo sapiens meiotic nuclear divisions 1 homolog (S. cerevisiae) (MND1), mRNA."	84057	38455411	MND1	GAJ	"A membrane-bounded organelle of eukaryotic cells in which chromosomes are housed and replicated. In most cells, the nucleus contains all of the cell's chromosomes except the organellar chromosomes, and is the site of RNA synthesis and processing. In some species, or in specialized cell types, RNA metabolism or DNA replication may be absent [goid 5634] [evidence IEA]"	Interacting selectively with DNA (deoxyribonucleic acid) [goid 3677] [evidence IEA]; Interacting selectively with any protein or protein complex (a complex of two or more proteins that may include other nonprotein molecules) [goid 5515] [evidence IEA]	"Any process by which a new genotype is formed by reassortment of genes resulting in gene combinations different from those that were present in the parents. In eukaryotes genetic recombination can occur by chromosome assortment, intrachromosomal recombination, or nonreciprocal interchromosomal recombination. Intrachromosomal recombination occurs by crossing over. In bacteria it may occur by gene…	+	154315474-154315488:154318371-154318405	ILMN_1671906	GGCCGATGTGAAACGGAAGAGCGAACCAGGCTAGCAAAAGAGCTTTCTTC	426	S	7550730	NP_115493.1	NM_032117.2	NM_032117.2	RefSeq	NM_032117.2	Homo sapiens	MND1	GAJ	MND1	ILMN_28552
0.513633	NM_002358.2	870546	4	4q27a	"Homo sapiens MAD2 mitotic arrest deficient-like 1 (yeast) (MAD2L1), mRNA."	4085	6466452	MAD2L1	MAD2; HSMAD2	"A multisubunit complex that is located at the centromeric region of DNA and provides an attachment point for the spindle microtubules [goid 776] [pmid 8824189] [evidence TAS]; A membrane-bounded organelle of eukaryotic cells in which chromosomes are housed and replicated. In most cells, the nucleus contains all of the cell's chromosomes except the organellar chromosomes, and is the site of RNA s…	Interacting selectively with any protein or protein complex (a complex of two or more proteins that may include other nonprotein molecules) [goid 5515] [pmid 17353931] [evidence IPI]; Interacting selectively with any protein or protein complex (a complex of two or more proteins that may include other nonprotein molecules) [goid 5515] [pmid 10527948] [evidence IPI]; Interacting selectively with an…	"Progression through mitosis, the division of the eukaryotic cell nucleus to produce two daughter nuclei that, usually, contain the identical chromosome complement to their mother [goid 7067] [evidence IEA]; The cell cycle process whereby replicated homologous chromosomes are organized and then physically separated and apportioned to two sets during the mitotic cell cycle. Each replicated chromos…	-	121200789-121200838	ILMN_1777564	GGGAAGAGTCGGGACCACAGTTTATTACCAATTCTGAGGAAGTCCGCCTT	574	S	870546	NP_002349.1	NM_002358.2	NM_002358.2	RefSeq	NM_002358.2	Homo sapiens	MAD2L1	MAD2; HSMAD2	MAD2L1	ILMN_23985
0.514029	NM_003504.3	2320170	22	22q11.21c	"Homo sapiens CDC45 cell division cycle 45-like (S. cerevisiae) (CDC45L), mRNA."	8318	34335230	CDC45L	CDC45L2; CDC45; PORC-PI-1	"A membrane-bounded organelle of eukaryotic cells in which chromosomes are housed and replicated. In most cells, the nucleus contains all of the cell's chromosomes except the organellar chromosomes, and is the site of RNA synthesis and processing. In some species, or in specialized cell types, RNA metabolism or DNA replication may be absent [goid 5634] [pmid 9660782] [evidence TAS]; That part of …	Interacting selectively with any protein or protein complex (a complex of two or more proteins that may include other nonprotein molecules) [goid 5515] [pmid 10518787] [evidence IPI]	"A signal transduction based surveillance mechanism that prevents the initiation of mitosis until DNA replication is complete, thereby ensuring that progeny inherit a full complement of the genome [goid 76] [pmid 9660782] [evidence TAS]; The process whereby new strands of DNA are synthesized. The template for replication can either be an existing DNA molecule or RNA [goid 6260] [evidence IEA]; Th…	+	17886374-17886423	ILMN_1670238	GCTGAAAGCTGAGGATCGGAGCAAGTTTCTGGACGCACTTATTTCCCTCC	1720	S	2320170	NP_003495.1	NM_003504.3	NM_003504.3	RefSeq	NM_003504.3	Homo sapiens	CDC45L	CDC45L2; CDC45; PORC-PI-1	CDC45L	ILMN_25781
0.514995	NM_014176.2	2480722	1	1q32.1d	"Homo sapiens ubiquitin-conjugating enzyme E2T (putative) (UBE2T), mRNA."	29089	142369556	UBE2T	PIG50; HSPC150	"A membrane-bounded organelle of eukaryotic cells in which chromosomes are housed and replicated. In most cells, the nucleus contains all of the cell's chromosomes except the organellar chromosomes, and is the site of RNA synthesis and processing. In some species, or in specialized cell types, RNA metabolism or DNA replication may be absent [goid 5634] [pmid 18029348] [evidence IDA]; A small, den…	"Catalysis of the reaction: ATP + ubiquitin + protein lysine = AMP + diphosphate + protein N-ubiquityllysine [goid 4842] [evidence IEA]; Catalysis of the ligation of two substances with concomitant breaking of a diphosphate linkage, usually in a nucleoside triphosphate. Ligase is the systematic name for any enzyme of EC class 6 [goid 16874] [evidence IEA]"	"The chemical reactions and pathways resulting in the breakdown of a protein or peptide by hydrolysis of its peptide bonds, initiated by the covalent attachment of a ubiquitin moiety, or multiple ubiquitin moieties, to the protein [goid 6511] [evidence IEA]; The covalent alteration of one or more amino acids occurring in a protein after the protein has been completely translated and released from…	-	200568772-200568821	ILMN_1711470	GCCAGCCTTCCTCAAGAATGCCAGACAGTGGACAGAGAAGCATGCAAGAC	533	S	2480722	NP_054895.1	NM_014176.2	NM_014176.1	RefSeq	NM_014176.2	Homo sapiens	UBE2T	HSPC150; PIG50	UBE2T	ILMN_9573
0.516088	NM_012485.1	4060064	5	5q34c	"Homo sapiens hyaluronan-mediated motility receptor (RHAMM) (HMMR), transcript variant 2, mRNA."	3161	7108350	HMMR	RHAMM; MGC119495; IHABP; MGC119494; CD168	"All of the contents of a cell excluding the plasma membrane and nucleus, but including other subcellular structures [goid 5737] [evidence IEA]; The external part of the cell wall and/or plasma membrane [goid 9986] [evidence IEA]"	"Interacting selectively with hyaluronic acid, a polymer composed of repeating dimeric units of glucuronic acid and N-acetyl glucosamine [goid 5540] [evidence IEA]; Combining with an extracellular or intracellular messenger to initiate a change in cell activity [goid 4872] [evidence IEA]"		+	162851071-162851120	ILMN_1781942	CCCCAGATTCTTCAGCTTGATCCTGGAGGTCTTTTCTAGTCTGAGCTTCT	2489	A	4060064	NP_036617.1	NM_012485.1	NM_012485.1	RefSeq	NM_012485.1	Homo sapiens	HMMR	RHAMM; MGC119495; IHABP; MGC119494; CD168	HMMR	ILMN_16900
0.517843	NM_014750.3	5220095	14	14q22.3a	"Homo sapiens discs, large (Drosophila) homolog-associated protein 5 (DLGAP5), mRNA."	9787	21361644	DLGAP5	DLG1; HURP; KIAA0008	"A membrane-bounded organelle of eukaryotic cells in which chromosomes are housed and replicated. In most cells, the nucleus contains all of the cell's chromosomes except the organellar chromosomes, and is the site of RNA synthesis and processing. In some species, or in specialized cell types, RNA metabolism or DNA replication may be absent [goid 5634] [pmid 12527899] [evidence IDA]; All of the c…	"Catalysis of the reaction: a phosphoprotein + H2O = a protein + phosphate. Together with protein kinases, these enzymes control the state of phosphorylation of cell proteins and thereby provide an important mechanism for regulating cellular activity [goid 4721] [pmid 15145941] [evidence IDA]; Interacting selectively with any protein or protein complex (a complex of two or more proteins that may …	"Progression through M phase, the part of the mitotic cell cycle during which mitosis takes place [goid 87] [pmid 12527899] [evidence IDA]; The progression of biochemical and morphological phases and events that occur in a cell during successive cell replication or nuclear replication events. Canonically, the cell cycle comprises the replication and segregation of genetic material followed by the…	-	54688327-54688376	ILMN_3239771	ATCCAGTGAGAGAATGAGTTTGCCTCTTCTTGCTGGTGGAGTAGCAGATG	2374	S	5220095	NP_055565.2	NM_014750.3	NM_014750.3	RefSeq	NM_014750.3	Homo sapiens	DLGAP5	DLG1; HURP; KIAA0008	DLGAP5	ILMN_4880
0.520553	NM_017579.1	6220209	10	10q26.13b	"Homo sapiens deleted in malignant brain tumors 1 (DMBT1), transcript variant 3, mRNA."	1755	8923739	DMBT1	GP340; muclin	"The space external to the outermost structure of a cell. For cells without external protective or external encapsulating structures this refers to space outside of the plasma membrane. This term covers the host cell environment outside an intracellular parasite [goid 5576] [pmid 14732920] [evidence TAS]; All of the contents of a cell excluding the plasma membrane and nucleus, but including other…	"Combining with acetylated low-density lipoproteins, advanced glycation end products, or other polyanionic ligands to initiate a change in cell activity [goid 5044] [pmid 9288095] [evidence NAS]; Combining with acetylated low-density lipoproteins, advanced glycation end products, or other polyanionic ligands to initiate a change in cell activity [goid 5044] [pmid 10485905] [evidence TAS]; Combini…	"The process whereby a relatively unspecialized cell acquires specialized features of an epithelial cell, any of the cells making up an epithelium [goid 30855] [pmid 14732920] [evidence TAS]; The process whereby a relatively unspecialized cell acquires specialized features of an epithelial cell, any of the cells making up an epithelium [goid 30855] [pmid 14676191] [evidence NAS]; Any process by w…	+	124392719-124392768	ILMN_2410612	GAGAGTTCTGACCTGGATGGCCCATAGACCTGACGTCCCAGAATCCATGC	7520	A	6220209	NP_060049.1	NM_017579.1	NM_017579.1	RefSeq	NM_017579.1	Homo sapiens	DMBT1	muclin; GP340	DMBT1	ILMN_5328
0.524051	NM_014573.2	3420541	17	17q11.2a	"Homo sapiens transmembrane protein 97 (TMEM97), mRNA."	27346	109948301	TMEM97	MAC30	"The part of a cell or its extracellular environment in which a gene product is located. A gene product may be located in one or more parts of a cell and its location may be as specific as a particular macromolecular complex, that is, a stable, persistent association of macromolecules that function together [goid 5575] [evidence ND ]; Double layer of lipid molecules that encloses all cells, and, …	"Elemental activities, such as catalysis or binding, describing the actions of a gene product at the molecular level. A given gene product may exhibit one or more molecular functions [goid 3674] [evidence ND ]"	"Any process that modulates the frequency, rate or extent of cell growth [goid 1558] [pmid 7694637] [evidence NAS]"	+	23679301-23679350	ILMN_1710962	GCTCACAAGCCATATTGGCCCGATTAGTGGTACTGTCTGACTCACGTGTG	2031	S	3420541	NP_055388.2	NM_014573.2	NM_014573.1	RefSeq	NM_014573.2	Homo sapiens	TMEM97	MAC30	TMEM97	ILMN_27777
0.524507	NM_004900.3	3170068	22	22q13.1c	"Homo sapiens apolipoprotein B mRNA editing enzyme, catalytic polypeptide-like 3B (APOBEC3B), mRNA."	9582	22907024	APOBEC3B	FLJ21201; APOBEC1L; ARCD3; DJ742C19.2; PHRBNL; ARP4; bK150C2.2	"The part of a cell or its extracellular environment in which a gene product is located. A gene product may be located in one or more parts of a cell and its location may be as specific as a particular macromolecular complex, that is, a stable, persistent association of macromolecules that function together [goid 5575] [evidence ND ]"	"Interacting selectively with an RNA molecule or a portion thereof [goid 3723] [evidence IEA]; Interacting selectively with zinc (Zn) ions [goid 8270] [evidence IEA]; Catalysis of the hydrolysis of various bonds, e.g. C-O, C-N, C-C, phosphoric anhydride bonds, etc. Hydrolase is the systematic name for any enzyme of EC class 3 [goid 16787] [evidence IEA]; Catalysis of the hydrolysis of any non-pep…	"Any process specifically pertinent to the functioning of integrated living units: cells, tissues, organs, and organisms. A process is a collection of molecular events with a defined beginning and end [goid 8150] [evidence ND ]"	+	37715452-37715501	ILMN_2219466	ACCCTTTGGTCCTTCGACGGCGCCAGACCTACTTGTGCTATGAGGTGGAG	668	S	3170068	NP_004891.3	NM_004900.3	NM_004900.3	RefSeq	NM_004900.3	Homo sapiens	APOBEC3B	FLJ21201; APOBEC1L; ARCD3; DJ742C19.2; PHRBNL; ARP4; bK150C2.2	APOBEC3B	ILMN_5305
0.52842	NM_002388.3	6650053	6	6p12.2a	"Homo sapiens minichromosome maintenance complex component 3 (MCM3), mRNA."	4172	33356548	MCM3	RLFB; HCC5; P1-MCM3; MGC1157; P1.h	"A membrane-bounded organelle of eukaryotic cells in which chromosomes are housed and replicated. In most cells, the nucleus contains all of the cell's chromosomes except the organellar chromosomes, and is the site of RNA synthesis and processing. In some species, or in specialized cell types, RNA metabolism or DNA replication may be absent [goid 5634] [pmid 18029348] [evidence IDA]; A small, den…	"Interacting selectively with a nucleotide, any compound consisting of a nucleoside that is esterified with (ortho)phosphate or an oligophosphate at any hydroxyl group on the ribose or deoxyribose moiety [goid 166] [evidence IEA]; Interacting selectively with DNA (deoxyribonucleic acid) [goid 3677] [evidence IEA]; Interacting selectively with ATP, adenosine 5'-triphosphate, a universally importan…	"The process whereby new strands of DNA are synthesized. The template for replication can either be an existing DNA molecule or RNA [goid 6260] [evidence IEA]; The process whereby new strands of DNA are synthesized. The template for replication can either be an existing DNA molecule or RNA [goid 6260] [pmid 12791985] [evidence EXP]; The process by which DNA replication is started; this involves t…	-	52236896-52236945	ILMN_2224143	GGCTTTGGGTGGTTCCAATTGGTGGAGAGAAGCTCTGAGGCACGTCATGC	2936	S	6650053	NP_002379.2	NM_002388.3	NM_002388.3	RefSeq	NM_002388.3	Homo sapiens	MCM3	HCC5; RLFB; P1-MCM3; MGC1157; P1.h	MCM3	ILMN_167533
0.529609	NM_005192.2	5260014	14	14q22.2b	"Homo sapiens cyclin-dependent kinase inhibitor 3 (CDK2-associated dual specificity phosphatase) (CDKN3), mRNA."	1033	17981703	CDKN3	CDI1; KAP; MGC70625; FLJ25787; CIP2; KAP1		"Catalysis of the reaction: protein serine/threonine phosphate + H2O = protein serine/threonine + phosphate [goid 4722] [pmid 12745075] [evidence IDA]; Catalysis of the reaction: protein tyrosine phosphate + H2O = protein tyrosine + phosphate [goid 4725] [pmid 8242750] [evidence IDA]; Interacting selectively with any protein or protein complex (a complex of two or more proteins that may include o…	"Any process that modulates the frequency, rate or extent of CDK activity [goid 79] [pmid 8242750] [evidence TAS]; Progression from G1 phase to S phase of the mitotic cell cycle [goid 82] [pmid 8127873] [evidence TAS]; The progression of biochemical and morphological phases and events that occur in a cell during successive cell replication or nuclear replication events. Canonically, the cell cycl…	+	53948082-53948131	ILMN_1666305	CGCAGATGGAGGGACTCCTGACATAGCCAGCTGCTGTGAAATAATGGAAG	385	S	5260014	NP_005183.2	NM_005192.2	NM_005192.2	RefSeq	NM_005192.2	Homo sapiens	CDKN3	CDI1; KAP; MGC70625; FLJ25787; CIP2; KAP1	CDKN3	ILMN_4098
0.530662	NM_018454.5	6350053	15	15q15.1c	"Homo sapiens nucleolar and spindle associated protein 1 (NUSAP1), transcript variant 2, mRNA."	51203	59710090	NUSAP1	LNP; FLJ13421; SAPL; BM037; PRO0310p1; Q0310; ANKT	"A membrane-bounded organelle of eukaryotic cells in which chromosomes are housed and replicated. In most cells, the nucleus contains all of the cell's chromosomes except the organellar chromosomes, and is the site of RNA synthesis and processing. In some species, or in specialized cell types, RNA metabolism or DNA replication may be absent [goid 5634] [evidence IEA]; All of the contents of a cel…	Interacting selectively with DNA (deoxyribonucleic acid) [goid 3677] [evidence IEA]	"A cell cycle process that results in the division of the cytoplasm of a cell after mitosis, resulting in the separation of the original cell into two daughter cells [goid 281] [pmid 12963707] [evidence IDA]; The progression of biochemical and morphological phases and events that occur in a cell during successive cell replication or nuclear replication events. Canonically, the cell cycle comprise…	+	39459619-39459668	ILMN_2409298	GGAGAAGAAAGCAAAGGTTTTGGGAATGCGAAGGGGCCTCATTTTGGCTG	1353	A	6350053	NP_060924.4	NM_018454.5	NM_018454.5	RefSeq	NM_018454.5	Homo sapiens	NUSAP1	LNP; FLJ13421; SAPL; BM037; PRO0310p1; Q0310; ANKT	NUSAP1	ILMN_26193
0.531145	NM_004111.4	3370703	11	11q12.2b	"Homo sapiens flap structure-specific endonuclease 1 (FEN1), mRNA."	2237	19718776	FEN1	RAD2; FEN-1; MF1	"A membrane-bounded organelle of eukaryotic cells in which chromosomes are housed and replicated. In most cells, the nucleus contains all of the cell's chromosomes except the organellar chromosomes, and is the site of RNA synthesis and processing. In some species, or in specialized cell types, RNA metabolism or DNA replication may be absent [goid 5634] [pmid 7961795] [evidence IDA]"	"Interacting selectively with magnesium (Mg) ions [goid 287] [evidence IEA]; Interacting selectively with damaged DNA [goid 3684] [pmid 8007985] [evidence TAS]; Interacting selectively with double-stranded DNA [goid 3690] [pmid 8131753] [evidence TAS]; Catalysis of the hydrolysis of ester linkages within nucleic acids by creating internal breaks [goid 4519] [pmid 8131753] [evidence TAS]; Catalysi…	"The process whereby new strands of DNA are synthesized. The template for replication can either be an existing DNA molecule or RNA [goid 6260] [pmid 15504738] [evidence NAS]; The repair of double-strand breaks in DNA via homologous and nonhomologous mechanisms to reform a continuous DNA helix [goid 6302] [pmid 8131753] [evidence TAS]; Any process by which an organism or cell protects itself from…	+	61321035-61321084	ILMN_2160929	GAGAAGATGGGCAGAAAGCTGGAGCCCCTGGAGTTGGCTGTGTCTGTGTT	1998	S	3370703	NP_004102.1	NM_004111.4	NM_004111.4	RefSeq	NM_004111.4	Homo sapiens	FEN1	RAD2; FEN-1; MF1	FEN1	ILMN_162686
0.5332	NR_002734.1	5960224	8	8q13.1b	"Homo sapiens pituitary tumor-transforming 3 (pseudogene) (PTTG3P), non-coding RNA."	26255	84872014	PTTG3P	rcPTTG1				-	67842374-67842423	ILMN_2049021	GCTTCGAGAGTTTTGACCTGCCTGAAGAGCACCAGATTGCACATCTCCCC	371	S	5960224		NR_002734.1	NR_002734.1	RefSeq	NR_002734.1	Homo sapiens	PTTG3P	rcPTTG1	PTTG3P	ILMN_6114
0.533471	NM_004217.2	6770026	17	17p13.1c	"Homo sapiens aurora kinase B (AURKB), mRNA."	9212	83776599	AURKB	ARK2; STK5; AurB; IPL1; AIM1; AIK2; STK12; AIM-1	"The region of a chromosome that includes the centromere and associated proteins. In monocentric chromosomes, this region corresponds to a single area of the chromosome, whereas in holocentric chromosomes, it is evenly distributed along the chromosome [goid 775] [evidence IEA]; A membrane-bounded organelle of eukaryotic cells in which chromosomes are housed and replicated. In most cells, the nucl…	"Interacting selectively with a nucleotide, any compound consisting of a nucleoside that is esterified with (ortho)phosphate or an oligophosphate at any hydroxyl group on the ribose or deoxyribose moiety [goid 166] [evidence IEA]; Interacting selectively with magnesium (Mg) ions [goid 287] [evidence IEA]; Interacting selectively with any nucleic acid [goid 3676] [evidence IEA]; Catalysis of the r…	"The process of introducing a phosphate group on to a protein [goid 6468] [evidence IEA]; The progression of biochemical and morphological phases and events that occur in a cell during successive cell replication or nuclear replication events. Canonically, the cell cycle comprises the replication and segregation of genetic material followed by the division of the cell, but in endocycles or syncyt…	-	8108342-8108362:8108534-8108562	ILMN_1684217	CACAACGAGACCTATCGCCGCATCGTCAAGGTGGACCTAAAGTTCCCCGC	893	S	6770026	NP_004208.2	NM_004217.2	NM_004217.1	RefSeq	NM_004217.2	Homo sapiens	AURKB	ARK2; STK5; AurB; IPL1; AIM1; AIK2; STK12; AIM-1	AURKB	ILMN_24702
0.539117	NR_001568.1	5960411	2	2p21a	"Homo sapiens brain cytoplasmic RNA 1 (non-protein coding) (BCYRN1), non-coding RNA."	618	34850482	BCYRN1	BC200a; BC200				+	47416014-47416063	ILMN_1678757	GGAGGATAGCTTGAGCCCAGGAGTTCGAGACCTGCCTGGGCAATATAGCG	57	S	5960411		NR_001568.1	NR_001568.1	RefSeq	NR_001568.1	Homo sapiens	BCYRN1	BC200a; BC200	BCYRN1	ILMN_21987
0.53956	NM_181573.1	2030315	3	3q27.3a	"Homo sapiens replication factor C (activator 1) 4, 37kDa (RFC4), transcript variant 2, mRNA."	5984	31881686	RFC4	A1; RFC37; MGC27291	"A membrane-bounded organelle of eukaryotic cells in which chromosomes are housed and replicated. In most cells, the nucleus contains all of the cell's chromosomes except the organellar chromosomes, and is the site of RNA synthesis and processing. In some species, or in specialized cell types, RNA metabolism or DNA replication may be absent [goid 5634] [evidence IEA]; That part of the nuclear con…	"Interacting selectively with a nucleotide, any compound consisting of a nucleoside that is esterified with (ortho)phosphate or an oligophosphate at any hydroxyl group on the ribose or deoxyribose moiety [goid 166] [evidence IEA]; Catalysis of the reaction: ATP + H2O = ADP + phosphate to drive the opening of the ring structure of the PCNA complex, or any of the related sliding clamp complexes, an…	"The process whereby new strands of DNA are synthesized. The template for replication can either be an existing DNA molecule or RNA [goid 6260] [pmid 15504738] [evidence NAS]; The process whereby new strands of DNA are synthesized. The template for replication can either be an existing DNA molecule or RNA [goid 6260] [pmid 12791985] [evidence EXP]; The process by which a DNA strand is synthesized…	-	187990679-187990728	ILMN_1724489	AGATGAGGGTCATGCAGCAACTCAGCTCGTCAATCAACTCCATGATGTGG	1082	A	2030315	NP_853551.1	NM_181573.1	NM_002916.3	RefSeq	NM_181573.1	Homo sapiens	RFC4	A1; RFC37; MGC27291	RFC4	ILMN_20643
0.541148	NM_006845.2	1470647	1	1p34.1d	"Homo sapiens kinesin family member 2C (KIF2C), mRNA."	11004	13699832	KIF2C	KNSL6; MCAK	"The region of a chromosome that includes the centromere and associated proteins. In monocentric chromosomes, this region corresponds to a single area of the chromosome, whereas in holocentric chromosomes, it is evenly distributed along the chromosome [goid 775] [evidence IEA]; A membrane-bounded organelle of eukaryotic cells in which chromosomes are housed and replicated. In most cells, the nucl…	"Interacting selectively with a nucleotide, any compound consisting of a nucleoside that is esterified with (ortho)phosphate or an oligophosphate at any hydroxyl group on the ribose or deoxyribose moiety [goid 166] [evidence IEA]; Catalysis of movement along a microtubule, coupled to the hydrolysis of a nucleoside triphosphate (usually ATP) [goid 3777] [pmid 9434124] [evidence TAS]; Interacting s…	"Movement of organelles, other microtubules and other particles along microtubules, mediated by motor proteins [goid 7018] [evidence IEA]; Progression through mitosis, the division of the eukaryotic cell nucleus to produce two daughter nuclei that, usually, contain the identical chromosome complement to their mother [goid 7067] [pmid 9434124] [evidence TAS]; The multiplication or reproduction of …	+	45005776-45005825	ILMN_1685916	CTGGGGTTGTCCTGGCTCTGGGGAGAGAGACGGAGCCTTTAGTACAGCTA	2570	S	1470647	NP_006836.1	NM_006845.2	NM_006845.2	RefSeq	NM_006845.2	Homo sapiens	KIF2C	KNSL6; MCAK	KIF2C	ILMN_25969
0.54118	NM_004219.2	10414	5	5q33.3d	"Homo sapiens pituitary tumor-transforming 1 (PTTG1), mRNA."	9232	11038651	PTTG1	PTTG; MGC126883; HPTTG; SECURIN; MGC138276; EAP1; TUTR1	"A membrane-bounded organelle of eukaryotic cells in which chromosomes are housed and replicated. In most cells, the nucleus contains all of the cell's chromosomes except the organellar chromosomes, and is the site of RNA synthesis and processing. In some species, or in specialized cell types, RNA metabolism or DNA replication may be absent [goid 5634] [pmid 9811450] [evidence TAS]; All of the co…	"The function of binding to a specific DNA sequence in order to modulate transcription. The transcription factor may or may not also interact selectively with a protein or macromolecular complex [goid 3700] [pmid 9811450] [evidence TAS]; [goid 4869] [pmid 12194817] [evidence NAS]; Interacting selectively with any protein or protein complex (a complex of two or more proteins that may include other…	"The process of restoring DNA after damage. Genomes are subject to damage by chemical and physical agents in the environment (e.g. UV and ionizing radiations, chemical mutagens, fungal and bacterial toxins, etc.) and by free radicals or alkylating agents endogenously generated in metabolism. DNA is also damaged because of errors during its replication. A variety of different DNA repair pathways h…	+	159781951-159781988:159782294-159782305	ILMN_1753196	GGTTGCTAAGGATGGGCTGAAGCTGGGGTCTGGACCTTCAATCAAAGCCT	99	S	10414	NP_004210.1	NM_004219.2	NM_004219.2	RefSeq	NM_004219.2	Homo sapiens	PTTG1	SECURIN; PTTG; MGC138276; EAP1; TUTR1; MGC126883; HPTTG	PTTG1	ILMN_11067
0.541425	NM_004219.2	1510291	5	5q33.3d	"Homo sapiens pituitary tumor-transforming 1 (PTTG1), mRNA."	9232	11038651	PTTG1	PTTG; MGC126883; HPTTG; SECURIN; MGC138276; EAP1; TUTR1	"A membrane-bounded organelle of eukaryotic cells in which chromosomes are housed and replicated. In most cells, the nucleus contains all of the cell's chromosomes except the organellar chromosomes, and is the site of RNA synthesis and processing. In some species, or in specialized cell types, RNA metabolism or DNA replication may be absent [goid 5634] [pmid 9811450] [evidence TAS]; All of the co…	"The function of binding to a specific DNA sequence in order to modulate transcription. The transcription factor may or may not also interact selectively with a protein or macromolecular complex [goid 3700] [pmid 9811450] [evidence TAS]; [goid 4869] [pmid 12194817] [evidence NAS]; Interacting selectively with any protein or protein complex (a complex of two or more proteins that may include other…	"The process of restoring DNA after damage. Genomes are subject to damage by chemical and physical agents in the environment (e.g. UV and ionizing radiations, chemical mutagens, fungal and bacterial toxins, etc.) and by free radicals or alkylating agents endogenously generated in metabolism. DNA is also damaged because of errors during its replication. A variety of different DNA repair pathways h…	+	159787441-159787458:159788187-159788218	ILMN_2042771	CTCCACCATGGGAATCCAATCTGTTGCAGTCTCCTTCAAGCATTCTGTCG	557	S	1510291	NP_004210.1	NM_004219.2	NM_004219.2	RefSeq	NM_004219.2	Homo sapiens	PTTG1	SECURIN; PTTG; MGC138276; EAP1; TUTR1; MGC126883; HPTTG	PTTG1	ILMN_11067
0.543859	XM_936372.2	6980632		19q13.32c	"PREDICTED: Homo sapiens lemur tyrosine kinase 3 (LMTK3), mRNA."	114783	113428681	LMTK3		"Double layer of lipid molecules that encloses all cells, and, in eukaryotes, many organelles; may be a single or double lipid bilayer; also includes associated proteins [goid 16020] [evidence IEA]; Penetrating at least one phospholipid bilayer of a membrane. May also refer to the state of being buried in the bilayer with no exposure outside the bilayer. When used to describe a protein, indicates…	"Interacting selectively with a nucleotide, any compound consisting of a nucleoside that is esterified with (ortho)phosphate or an oligophosphate at any hydroxyl group on the ribose or deoxyribose moiety [goid 166] [evidence IEA]; Catalysis of the reaction: ATP + a protein serine/threonine = ADP + protein serine/threonine phosphate [goid 4674] [evidence IEA]; Catalysis of the reaction: ATP + a pr…	The process of introducing a phosphate group on to a protein [goid 6468] [evidence IEA]			ILMN_1668194	CCCTGGAGGGGCCTCTGGTTCAAACCTTCGCGTGGCATTTTCACATTATT	4892	A	6980632	XP_941465.1	XM_936372.2	XM_936372.1	RefSeq	XM_936372.2	Homo sapiens	LMTK3		LMTK3	ILMN_35173
0.545838	NM_004629.1	4220612	9	9p13.3b	"Homo sapiens Fanconi anemia, complementation group G (FANCG), mRNA."	2189	4759335	FANCG	XRCC9; FAG	"A membrane-bounded organelle of eukaryotic cells in which chromosomes are housed and replicated. In most cells, the nucleus contains all of the cell's chromosomes except the organellar chromosomes, and is the site of RNA synthesis and processing. In some species, or in specialized cell types, RNA metabolism or DNA replication may be absent [goid 5634] [evidence IEA]; All of the contents of a cel…	"Interacting selectively with damaged DNA [goid 3684] [pmid 9806548] [evidence TAS]; The selective, often stoichiometric, interaction of a molecule with one or more specific sites on another molecule [goid 5488] [evidence IEA]"	"A point in the eukaryotic cell cycle where progress through the cycle can be halted until conditions are suitable for the cell to proceed to the next stage [goid 75] [pmid 9256465] [evidence TAS]; The process of restoring DNA after damage. Genomes are subject to damage by chemical and physical agents in the environment (e.g. UV and ionizing radiations, chemical mutagens, fungal and bacterial tox…	-	35073949-35073998	ILMN_1758728	TCCTGGACTGGTGAGATTGGTGGTAGGCCTGTGAAATTTGCCCTAGTTAC	2467	S	4220612	NP_004620.1	NM_004629.1	NM_004629.1	RefSeq	NM_004629.1	Homo sapiens	FANCG	XRCC9; FAG	FANCG	ILMN_23865
0.546202	XM_001720343.1	6380037			"PREDICTED: Homo sapiens hypothetical protein LOC100130516 (LOC100130516), mRNA."	100130516	169217578	LOC100130516							ILMN_3231944	AAATCTTGGCTGTGTGTAGTGGCTCACGCCTGTAATCCCAGCTCTTAGGG	899	I	6380037	XP_001720395.1	XM_001720343.1	XM_001720343.1	RefSeq	XM_001720343.1	Homo sapiens	LOC100130516		LOC100130516	ILMN_341194
0.546657	NM_001826.1	2450358	1	1q21.3e	"Homo sapiens CDC28 protein kinase regulatory subunit 1B (CKS1B), mRNA."	1163	4502856	CKS1B	PNAS-18; PNAS-16; ckshs1; CKS1	That part of the nuclear content other than the chromosomes or the nucleolus [goid 5654] [pmid 11231585] [evidence EXP]	"Catalysis of the transfer of a phosphate group, usually from ATP, to a substrate molecule [goid 16301] [evidence IEA]; Modulates the activity of a cyclin-dependent protein kinase, enzymes of the protein kinase family that are regulated through association with cyclins and other proteins [goid 16538] [evidence IEA]; Catalysis of the transfer of a phosphate group, usually from ATP, to a substrate …	"The progression of biochemical and morphological phases and events that occur in a cell during successive cell replication or nuclear replication events. Canonically, the cell cycle comprises the replication and segregation of genetic material followed by the division of the cell, but in endocycles or syncytial cells nuclear replication or nuclear division may not be followed by cell division [g…	+	153218093-153218142	ILMN_2041046	CCTAAGCTGAGTGTGACCCCAGAAGCCACGATGTGCTCTGTATCCAGAAC	464	S	2450358	NP_001817.1	NM_001826.1	NM_001826.1	RefSeq	NM_001826.1	Homo sapiens	CKS1B	PNAS-18; PNAS-16; ckshs1; CKS1	CKS1B	ILMN_11313
0.546777	NM_001255.2	1500010	1	1p34.2a	"Homo sapiens cell division cycle 20 homolog (S. cerevisiae) (CDC20), mRNA."	991	118402581	CDC20	bA276H19.3; p55CDC	That part of the nuclear content other than the chromosomes or the nucleolus [goid 5654] [pmid 15469984] [evidence EXP]; That part of the nuclear content other than the chromosomes or the nucleolus [goid 5654] [pmid 12791267] [evidence EXP]; The array of microtubules and associated molecules that forms between opposite poles of a eukaryotic cell during mitosis or meiosis and serves to move the du…	Interacting selectively with any protein or protein complex (a complex of two or more proteins that may include other nonprotein molecules) [goid 5515] [pmid 17353931] [evidence IPI]; Interacting selectively with any protein or protein complex (a complex of two or more proteins that may include other nonprotein molecules) [goid 5515] [pmid 11030144] [evidence IPI]; Interacting selectively with an…	"The chemical reactions and pathways resulting in the breakdown of a protein or peptide by hydrolysis of its peptide bonds, initiated by the covalent attachment of a ubiquitin moiety, or multiple ubiquitin moieties, to the protein [goid 6511] [pmid 9682218] [evidence TAS]; The progression of biochemical and morphological phases and events that occur in a cell during successive cell replication or…	+	43601340-43601387:43601388-43601389	ILMN_1663390	AAGGCCAGTGCAGCCAAAAGCAGCCTCATCCACCAAGGCATCCGCTGAAG	1554	S	1500010	NP_001246.2	NM_001255.2	NM_001255.1	RefSeq	NM_001255.2	Homo sapiens	CDC20	CDC20A; bA276H19.3; MGC102824; p55CDC	CDC20	ILMN_8354
0.547116	NM_030771.1	3450408	11	11p14.1d	"Homo sapiens coiled-coil domain containing 34 (CCDC34), transcript variant 1, mRNA."	91057	63054847	CCDC34	L15; NY-REN-41; RAMA3				-	27360380-27360429	ILMN_2288784	CTGGTAATTCATAAAGCCAGGAGCAATCTTTGCCTTGGAACTCTGTGCAG	1114	I	3450408	NP_110398.1	NM_030771.1	NM_030771.1	RefSeq	NM_030771.1	Homo sapiens	CCDC34	L15; NY-REN-41; RAMA3	CCDC34	ILMN_2645
0.547228	NM_004336.2	2070224	2	2q13b	"Homo sapiens BUB1 budding uninhibited by benzimidazoles 1 homolog (yeast) (BUB1), mRNA."	699	56118215	BUB1	hBUB1; BUB1L; BUB1A	"A multisubunit complex that is located at the centromeric region of a condensed chromosome and provides an attachment point for the spindle microtubules [goid 777] [evidence IEA]; A membrane-bounded organelle of eukaryotic cells in which chromosomes are housed and replicated. In most cells, the nucleus contains all of the cell's chromosomes except the organellar chromosomes, and is the site of R…	"Interacting selectively with a nucleotide, any compound consisting of a nucleoside that is esterified with (ortho)phosphate or an oligophosphate at any hydroxyl group on the ribose or deoxyribose moiety [goid 166] [evidence IEA]; Catalysis of the reaction: ATP + a protein serine/threonine = ADP + protein serine/threonine phosphate [goid 4674] [evidence IEA]; Interacting selectively with ATP, ade…	"The process of introducing a phosphate group on to a protein [goid 6468] [evidence IEA]; The progression of biochemical and morphological phases and events that occur in a cell during successive cell replication or nuclear replication events. Canonically, the cell cycle comprises the replication and segregation of genetic material followed by the division of the cell, but in endocycles or syncyt…	-	111112194-111112208:111113791-111113825	ILMN_2202948	AGGAGGAGAGTGTAAGCCTGAAGGTCTTTTTAGAAGGCTTCCTCATTTGG	3119	S	2070224	NP_004327.1	NM_004336.2	NM_004336.2	RefSeq	NM_004336.2	Homo sapiens	BUB1	hBUB1; BUB1L; BUB1A	BUB1	ILMN_10590
0.547248	NM_001071.1	5910364	18	18p11.32c	"Homo sapiens thymidylate synthetase (TYMS), mRNA."	7298	4507750	TYMS	TS; TSase; TMS; HsT422; MGC88736	That part of the cytoplasm that does not contain membranous or particulate subcellular components [goid 5829] [pmid 2656695] [evidence EXP]	"Catalysis of the reaction: 5,10-methylenetetrahydrofolate + dUMP = dihydrofolate + dTMP [goid 4799] [evidence IEA]; Catalysis of the reaction: 5,10-methylenetetrahydrofolate + dUMP = dihydrofolate + dTMP [goid 4799] [pmid 2656695] [evidence EXP]; Catalysis of the transfer of a methyl group to an acceptor molecule [goid 8168] [evidence IEA]; Catalysis of the transfer of a group, e.g. a methyl gro…	"The chemical reactions and pathways involving nucleobases, nucleosides, nucleotides and nucleic acids [goid 6139] [pmid 2987839] [evidence TAS]; The chemical reactions and pathways resulting in the formation of dTMP, deoxyribosylthymine monophosphate (2'-deoxyribosylthymine 5'-phosphate) [goid 6231] [evidence IEA]; The process whereby new strands of DNA are synthesized. The template for replicat…	+	663033-663082	ILMN_1806040	GGATATTGTCAGTCTTTAGGGGTTGGGCTGGATGCCGAGGTAAAAGTTCT	1070	S	5910364	NP_001062.1	NM_001071.1	NM_001071.1	RefSeq	NM_001071.1	Homo sapiens	TYMS	TS; TSase; TMS; HsT422; MGC88736	TYMS	ILMN_26899
0.548167	NM_004701.2	5360070	15	15q22.2a	"Homo sapiens cyclin B2 (CCNB2), mRNA."	9133	10938017	CCNB2	HsT17299	"A membrane-bounded organelle of eukaryotic cells in which chromosomes are housed and replicated. In most cells, the nucleus contains all of the cell's chromosomes except the organellar chromosomes, and is the site of RNA synthesis and processing. In some species, or in specialized cell types, RNA metabolism or DNA replication may be absent [goid 5634] [evidence IEA]; That part of the cytoplasm t…	Interacting selectively with any protein or protein complex (a complex of two or more proteins that may include other nonprotein molecules) [goid 5515] [pmid 15232106] [evidence IPI]	"The progression of biochemical and morphological phases and events that occur in a cell during successive cell replication or nuclear replication events. Canonically, the cell cycle comprises the replication and segregation of genetic material followed by the division of the cell, but in endocycles or syncytial cells nuclear replication or nuclear division may not be followed by cell division [g…	+	57204299-57204348	ILMN_1801939	CAGCATGATCCCTCAGCTGAACTCAAAAGCCGTCAAAGACCTTGCCTCCC	1276	S	5360070	NP_004692.1	NM_004701.2	NM_004701.2	RefSeq	NM_004701.2	Homo sapiens	CCNB2	HsT17299	CCNB2	ILMN_15254
0.548828	XM_941060.1	1570746			"PREDICTED: Homo sapiens similar to Ubiquitin-conjugating enzyme E2S (Ubiquitin-conjugating enzyme E2-24 kDa) (Ubiquitin-protein ligase) (Ubiquitin carrier protein) (E2-EPF5) (LOC651816), mRNA."	651816	89062188	LOC651816							ILMN_1729115	AGGTGCCTGCTGATCCACCCTAACCCCGAGTCTGCACTCAACGAGGAGGC	542	S	1570746	XP_946153.1	XM_941060.1	XM_941060.1	RefSeq	XM_941060.1	Homo sapiens	LOC651816		LOC651816	ILMN_46354
0.550216	XM_930579.2	3440424	1	1p12a	"PREDICTED: Homo sapiens similar to family with sequence similarity 72, member A, transcript variant 1 (LOC653820), mRNA."	653820	113410935	LOC653820					+	120641392-120641441	ILMN_1701882	CGTGTCCATCCTGTGTTGCAAATTCTGTAAACAAGTGCTCAGCTCTAGGG	911	I	3440424	XP_935672.1	XM_930579.2	XM_930040.1	RefSeq	XM_930579.2	Homo sapiens	LOC653820		LOC653820	ILMN_40990
0.550355	NM_012112.4	6290358	20	20q11.21b	"Homo sapiens TPX2, microtubule-associated, homolog (Xenopus laevis) (TPX2), mRNA."	22974	40354199	TPX2	GD:C20orf1; HCTP4; C20orf1; FLS353; DIL-2; HCA519; DIL2; p100; REPP86; C20orf2	"Either of the ends of a spindle, where spindle microtubules are organized; usually contains a microtubule organizing center and accessory molecules, spindle microtubules and astral microtubules [goid 922] [pmid 14718566] [evidence IDA]; A membrane-bounded organelle of eukaryotic cells in which chromosomes are housed and replicated. In most cells, the nucleus contains all of the cell's chromosome…	"Interacting selectively with any protein or protein complex (a complex of two or more proteins that may include other nonprotein molecules) [goid 5515] [pmid 14580337] [evidence IPI]; Interacting selectively with ATP, adenosine 5'-triphosphate, a universally important coenzyme and enzyme regulator [goid 5524] [pmid 10512675] [evidence TAS]; Interacting selectively with GTP, guanosine triphosphat…	"Progression through mitosis, the division of the eukaryotic cell nucleus to produce two daughter nuclei that, usually, contain the identical chromosome complement to their mother [goid 7067] [pmid 9207457] [evidence TAS]; The multiplication or reproduction of cells, resulting in the expansion of a cell population [goid 8283] [pmid 10512675] [evidence TAS]"	+	29852491-29852540	ILMN_1796949	CAGCCTCTGACTGTGCCTGTATCTCCCAAATTCTCCACTCGATTCCACTG	2889	S	6290358	NP_036244.2	NM_012112.4	NM_012112.4	RefSeq	NM_012112.4	Homo sapiens	TPX2	GD:C20orf1; HCTP4; C20orf1; FLS353; DIL-2; HCA519; DIL2; p100; REPP86; C20orf2	TPX2	ILMN_20208
0.551109	NR_002440.1	1430427	15	15q22.31c	"Homo sapiens small nucleolar RNA, C/D box 16 (SNORD16), small nucleolar RNA."	595097	71795634	SNORD16	U16				-	66795181-66795230	ILMN_1669210	TTGCGTCTTACTCTGTTCTCAGCGACAGTTGCCTGCTGTCAGTAAGCTGG	18	S	1430427		NR_002440.1	NR_002440.1	RefSeq	NR_002440.1	Homo sapiens	SNORD16	U16	SNORD16	ILMN_29226
0.552302	NM_004526.2	6770408	3	3q21.3b	"Homo sapiens minichromosome maintenance complex component 2 (MCM2), mRNA."	4171	33356546	MCM2	MGC10606; CCNL1; MITOTIN; CDCL1; KIAA0030; D3S3194; BM28; cdc19	"The ordered and organized complex of DNA and protein that forms the chromosome [goid 785] [pmid 8798650] [evidence TAS]; A membrane-bounded organelle of eukaryotic cells in which chromosomes are housed and replicated. In most cells, the nucleus contains all of the cell's chromosomes except the organellar chromosomes, and is the site of RNA synthesis and processing. In some species, or in special…	"Interacting selectively with a nucleotide, any compound consisting of a nucleoside that is esterified with (ortho)phosphate or an oligophosphate at any hydroxyl group on the ribose or deoxyribose moiety [goid 166] [evidence IEA]; Interacting selectively with DNA (deoxyribonucleic acid) [goid 3677] [pmid 8175912] [evidence TAS]; Interacting selectively with the DNA replication origin, a unique DN…	"The process whereby new strands of DNA are synthesized. The template for replication can either be an existing DNA molecule or RNA [goid 6260] [pmid 12791985] [evidence EXP]; The process whereby new strands of DNA are synthesized. The template for replication can either be an existing DNA molecule or RNA [goid 6260] [pmid 8175912] [evidence TAS]; The process by which interchain hydrogen bonds be…	+	127340962-127341011	ILMN_1681503	GAGCTGCTGCCCTCTTGGCGTGAGTTGCGTATTCAGGCTGCTTTTGCTGC	3118	S	6770408	NP_004517.2	NM_004526.2	NM_004526.2	RefSeq	NM_004526.2	Homo sapiens	MCM2	KIAA0030; D3S3194; MGC10606; CCNL1; BM28; MITOTIN; CDCL1; cdc19	MCM2	ILMN_183916
0.553827	NM_006397.2	4230068	19	19p13.13c	"Homo sapiens ribonuclease H2, subunit A (RNASEH2A), mRNA."	10535	38455390	RNASEH2A	RNHIA; AGS4; RNHL; RNASEHI; JUNB	"A membrane-bounded organelle of eukaryotic cells in which chromosomes are housed and replicated. In most cells, the nucleus contains all of the cell's chromosomes except the organellar chromosomes, and is the site of RNA synthesis and processing. In some species, or in specialized cell types, RNA metabolism or DNA replication may be absent [goid 5634] [evidence IEA]"	"Interacting selectively with an RNA molecule or a portion thereof [goid 3723] [evidence IEA]; Catalysis of the hydrolysis of ester linkages within nucleic acids by creating internal breaks [goid 4519] [evidence IEA]; Catalysis of the endonucleolytic cleavage of RNA in RNA-DNA hybrids to 5'-phosphomonoesters [goid 4523] [evidence IEA]; Catalysis of the hydrolysis of phosphodiester bonds in chains…	"The process whereby new strands of DNA are synthesized. The template for replication can either be an existing DNA molecule or RNA [goid 6260] [pmid 9789007] [evidence TAS]; The chemical reactions and pathways resulting in the breakdown of RNA, ribonucleic acid, one of the two main type of nucleic acid, consisting of a long, unbranched macromolecule formed from ribonucleotides joined in 3',5'-ph…	+	12785196-12785245	ILMN_1810901	CCTCAATGAAGGGTCCCAAGCCCGTCCCCGTTCTTCCCACCGATATTTCC	876	S	4230068	NP_006388.2	NM_006397.2	NM_006397.2	RefSeq	NM_006397.2	Homo sapiens	RNASEH2A	RNHIA; AGS4; RNHL; RNASEHI; JUNB	RNASEH2A	ILMN_20484
0.553952	NM_138443.2	2230681	18	18q21.1a	"Homo sapiens coiled-coil domain containing 5 (spindle associated) (CCDC5), mRNA."	115106	34147542	CCDC5	FLJ40084; HEI-C; FLJ21094; HsT1461	"All of the contents of a cell excluding the plasma membrane and nucleus, but including other subcellular structures [goid 5737] [evidence IEA]; Any of the long, generally straight, hollow tubes of internal diameter 12-15 nm and external diameter 24 nm found in a wide variety of eukaryotic cells; each consists (usually) of 13 protofilaments of polymeric tubulin, staggered in such a manner that th…		"The progression of biochemical and morphological phases and events that occur in a cell during successive cell replication or nuclear replication events. Canonically, the cell cycle comprises the replication and segregation of genetic material followed by the division of the cell, but in endocycles or syncytial cells nuclear replication or nuclear division may not be followed by cell division [g…	+	41938351-41938375:41938376-41938400	ILMN_1745946	TAGTAAAGTGGCGGGAGCCGCAGCTATGGAGCCGCAGGAGGAGAGAGAAA	29	I	2230681	NP_612452.1	NM_138443.2	NM_138443.2	RefSeq	NM_138443.2	Homo sapiens	CCDC5	FLJ40084; HEI-C; FLJ21094; HsT1461	CCDC5	ILMN_18943
0.553972	NM_000946.2	6200390	12	12q13.3a	"Homo sapiens primase, DNA, polypeptide 1 (49kDa) (PRIM1), mRNA."	5557	41349493	PRIM1	MGC12308; p49	"That part of the nuclear content other than the chromosomes or the nucleolus [goid 5654] [pmid 9822671] [evidence EXP]; That part of the nuclear content other than the chromosomes or the nucleolus [goid 5654] [pmid 11473323] [evidence EXP]; That part of the nuclear content other than the chromosomes or the nucleolus [goid 5654] [pmid 6693436] [evidence EXP]; A complex of four polypeptides, compr…	"Catalysis of the synthesis of a short RNA primer on a DNA template, providing a free 3'-OH that can be extended by DNA-directed DNA polymerases. Catalyzed by a DNA-directed RNA polymerase that forms a complex with alpha DNA polymerase [goid 3896] [pmid 8026492] [evidence TAS]; Interacting selectively with any protein or protein complex (a complex of two or more proteins that may include other no…	"The process whereby new strands of DNA are synthesized. The template for replication can either be an existing DNA molecule or RNA [goid 6260] [evidence IEA]; The synthesis of a short RNA polymer, usually 4-15 nucleotides long, using one strand of unwound DNA as a template; the RNA then serves as a primer from which DNA polymerases extend synthesis [goid 6269] [pmid 8026492] [evidence TAS]; The …	-	57135284-57135333	ILMN_1694502	ACCCTGGCTGGAGTGGGAGATTATGCTCCAGTACTGTTTTCCACGGCTGG	931	S	6200390	NP_000937.1	NM_000946.2	NM_000946.2	RefSeq	NM_000946.2	Homo sapiens	PRIM1	MGC12308; p49	PRIM1	ILMN_20991
0.555505	NM_000946.2	2140273	12	12q13.3a	"Homo sapiens primase, DNA, polypeptide 1 (49kDa) (PRIM1), mRNA."	5557	41349493	PRIM1	MGC12308; p49	"That part of the nuclear content other than the chromosomes or the nucleolus [goid 5654] [pmid 9822671] [evidence EXP]; That part of the nuclear content other than the chromosomes or the nucleolus [goid 5654] [pmid 11473323] [evidence EXP]; That part of the nuclear content other than the chromosomes or the nucleolus [goid 5654] [pmid 6693436] [evidence EXP]; A complex of four polypeptides, compr…	"Catalysis of the synthesis of a short RNA primer on a DNA template, providing a free 3'-OH that can be extended by DNA-directed DNA polymerases. Catalyzed by a DNA-directed RNA polymerase that forms a complex with alpha DNA polymerase [goid 3896] [pmid 8026492] [evidence TAS]; Interacting selectively with any protein or protein complex (a complex of two or more proteins that may include other no…	"The process whereby new strands of DNA are synthesized. The template for replication can either be an existing DNA molecule or RNA [goid 6260] [evidence IEA]; The synthesis of a short RNA polymer, usually 4-15 nucleotides long, using one strand of unwound DNA as a template; the RNA then serves as a primer from which DNA polymerases extend synthesis [goid 6269] [pmid 8026492] [evidence TAS]; The …	-	57132295-57132309:57133078-57133112	ILMN_2210129	GGACCAGTTTGATCCATTTACTGTTCCGACCATAAGCTTCATCTGCCGTG	1081	S	2140273	NP_000937.1	NM_000946.2	NM_000946.2	RefSeq	NM_000946.2	Homo sapiens	PRIM1	MGC12308; p49	PRIM1	ILMN_175450
0.556073	NM_014750.3	240221	14	14q22.3a	"Homo sapiens discs, large (Drosophila) homolog-associated protein 5 (DLGAP5), mRNA."	9787	21361644	DLGAP5	DLG1; HURP; KIAA0008	"A membrane-bounded organelle of eukaryotic cells in which chromosomes are housed and replicated. In most cells, the nucleus contains all of the cell's chromosomes except the organellar chromosomes, and is the site of RNA synthesis and processing. In some species, or in specialized cell types, RNA metabolism or DNA replication may be absent [goid 5634] [pmid 12527899] [evidence IDA]; All of the c…	"Catalysis of the reaction: a phosphoprotein + H2O = a protein + phosphate. Together with protein kinases, these enzymes control the state of phosphorylation of cell proteins and thereby provide an important mechanism for regulating cellular activity [goid 4721] [pmid 15145941] [evidence IDA]; Interacting selectively with any protein or protein complex (a complex of two or more proteins that may …	"Progression through M phase, the part of the mitotic cell cycle during which mitosis takes place [goid 87] [pmid 12527899] [evidence IDA]; The progression of biochemical and morphological phases and events that occur in a cell during successive cell replication or nuclear replication events. Canonically, the cell cycle comprises the replication and segregation of genetic material followed by the…	-	54684927-54684944:54687270-54687301	ILMN_1749829	AGTCTCACTACTGAATGCCACCTTCTTGATTCACCAGGTCTAAACTGCAG	2603	S	240221	NP_055565.2	NM_014750.3	NM_014750.3	RefSeq	NM_014750.3	Homo sapiens	DLGAP5	DLG1; HURP; KIAA0008	DLGAP5	ILMN_4880
0.558399	NM_182494.1	6180450	10	10q24.33a	"Homo sapiens family with sequence similarity 26, member A (FAM26A), mRNA."	119395	32698827	FAM26A	bA225H22.7	"Double layer of lipid molecules that encloses all cells, and, in eukaryotes, many organelles; may be a single or double lipid bilayer; also includes associated proteins [goid 16020] [evidence IEA]; Penetrating at least one phospholipid bilayer of a membrane. May also refer to the state of being buried in the bilayer with no exposure outside the bilayer. When used to describe a protein, indicates…			-	105222692-105222741	ILMN_1661022	CACCGAGGGCCTTGTTAAATACAGGTTCAGACAGTGTAGCCAGGACCGAG	1461	S	6180450	NP_872300.1	NM_182494.1	NM_182494.1	RefSeq	NM_182494.1	Homo sapiens	FAM26A	bA225H22.7	FAM26A	ILMN_19195
0.561565	NM_003384.2	2600739	14	14q32.2a	"Homo sapiens vaccinia related kinase 1 (VRK1), mRNA."	7443	71164882	VRK1	MGC138280; MGC142070; MGC117401	"A membrane-bounded organelle of eukaryotic cells in which chromosomes are housed and replicated. In most cells, the nucleus contains all of the cell's chromosomes except the organellar chromosomes, and is the site of RNA synthesis and processing. In some species, or in specialized cell types, RNA metabolism or DNA replication may be absent [goid 5634] [evidence IEA]; All of the contents of a cel…	"Interacting selectively with a nucleotide, any compound consisting of a nucleoside that is esterified with (ortho)phosphate or an oligophosphate at any hydroxyl group on the ribose or deoxyribose moiety [goid 166] [evidence IEA]; Catalysis of the reaction: ATP + a protein serine/threonine = ADP + protein serine/threonine phosphate [goid 4674] [pmid 9344656] [evidence TAS]; Interacting selectivel…	The process of introducing a phosphate group on to a protein [goid 6468] [pmid 9344656] [evidence TAS]	+	96412169-96412210:96417267-96417274	ILMN_1805828	CGGAATGGTCAAACACACAGACAGAGGAGGCCATACAGACCCGTTCAAGA	1224	S	2600739	NP_003375.1	NM_003384.2	NM_003384.2	RefSeq	NM_003384.2	Homo sapiens	VRK1	MGC142070; MGC138280; MGC117401	VRK1	ILMN_24124
0.561945	NM_003609.2	1770717	16	16p11.2d	"Homo sapiens HIRA interacting protein 3 (HIRIP3), mRNA."	8479	21396499	HIRIP3		"A membrane-bounded organelle of eukaryotic cells in which chromosomes are housed and replicated. In most cells, the nucleus contains all of the cell's chromosomes except the organellar chromosomes, and is the site of RNA synthesis and processing. In some species, or in specialized cell types, RNA metabolism or DNA replication may be absent [goid 5634] [pmid 9710638] [evidence TAS]"		The formation or destruction of chromatin structures [goid 6333] [pmid 9710638] [evidence TAS]	-	30004374-30004423	ILMN_1678037	GCAGCTCCCAAGGACACAAGCTGTTGGGATGCTACTTCTCAGCTTCACGC	2236	S	1770717	NP_003600.2	NM_003609.2	NM_003609.2	RefSeq	NM_003609.2	Homo sapiens	HIRIP3		HIRIP3	ILMN_5112
0.564043	NM_002960.1	150100	1	1q21.3c	"Homo sapiens S100 calcium binding protein A3 (S100A3), mRNA."	6274	4506762	S100A3	S100E		Interacting selectively with calcium ions (Ca2+) [goid 5509] [evidence IEA]; Interacting selectively with any protein or protein complex (a complex of two or more proteins that may include other nonprotein molecules) [goid 5515] [pmid 17353931] [evidence IPI]; Interacting selectively with zinc (Zn) ions [goid 8270] [evidence IEA]		-	153519825-153519874	ILMN_1712545	GCAGAGCGTGCACCAATGAGACCACGATGGGAAAGGGCCTATTTAACTCC	672	S	150100	NP_002951.1	NM_002960.1	NM_002960.1	RefSeq	NM_002960.1	Homo sapiens	S100A3	S100E	S100A3	ILMN_19000
0.565188	NR_024542.1	4260202	9		"Homo sapiens small nucleolar RNA host gene 7 (non-protein coding) (SNHG7), transcript variant 2, non-coding RNA."	84973	215422347	SNHG7					-	139619455-139619504	ILMN_3233229	TACAGATAGAGGCCTCACCCCCTCTGGGACCACTGGCACTCAGGGTGTTT	509	I	4260202		NR_024542.1	NR_024542.1	RefSeq	NR_024542.1	Homo sapiens	SNHG7		SNHG7	ILMN_371368
0.567022	NM_001182.2	4150544	5	5q23.2e	"Homo sapiens aldehyde dehydrogenase 7 family, member A1 (ALDH7A1), mRNA."	501	66348118	ALDH7A1		"The part of a cell or its extracellular environment in which a gene product is located. A gene product may be located in one or more parts of a cell and its location may be as specific as a particular macromolecular complex, that is, a stable, persistent association of macromolecules that function together [goid 5575] [evidence ND ]; A semiautonomous, self replicating organelle that occurs in va…	"Catalysis of the reaction: an aldehyde + NAD+ + H2O = an acid + NADH + H+ [goid 4029] [evidence ISS]; Catalysis of the reaction: L-2-aminoadipate 6-semialdehyde + NADP+ + H2O = L-2-aminoadipate + NADPH + H+ [goid 4043] [evidence IEA]; Catalysis of an oxidation-reduction (redox) reaction, a reversible chemical reaction in which the oxidation state of an atom or atoms within a molecule is altered.…	"The chemical reactions and pathways involving aldehydes, any organic compound with the formula R-CH=O, as carried out by individual cells [goid 6081] [evidence ISS]; The series of events required for an organism to receive an auditory stimulus, convert it to a molecular signal, and recognize and characterize the signal. Sonic stimuli are detected in the form of vibrations and are processed to fo…	-	125913567-125913593:125913787-125913809	ILMN_1763461	GGGCAGAATCTTTCGCTGGCTTGGACCTAAAGGATCAGACTGTGGCATTG	1442	A	4150544	NP_001173.1	NM_001182.2	XM_937964.1	RefSeq	NM_001182.2	Homo sapiens	ALDH7A1	ATQ1; PDE; EPD	ALDH7A1	ILMN_11622
0.567616	NR_002560.1	6660010	11	11q12.3b	"Homo sapiens small nucleolar RNA, C/D box 31 (SNORD31), small nucleolar RNA."	9298	74315926	SNORD31	RNU31; U31				-	62620815-62620864	ILMN_2072391	CACCAGTGATGAGTTGAATACCGCCCCAGTCTGATCAATGTGTGACTGAA	1	S	6660010		NR_002560.1	NR_002560.1	RefSeq	NR_002560.1	Homo sapiens	SNORD31	RNU31; U31	SNORD31	ILMN_21164
0.567894	NM_030579.2	510474	16	16q22.1e	"Homo sapiens cytochrome b5 type B (outer mitochondrial membrane) (CYB5B), nuclear gene encoding mitochondrial protein, mRNA."	80777	83921613	CYB5B	OMB5; DKFZp686M0619	"A semiautonomous, self replicating organelle that occurs in varying numbers, shapes, and sizes in the cytoplasm of virtually all eukaryotic cells. It is notably the site of tissue respiration [goid 5739] [evidence IEA]; The outer, i.e. cytoplasm-facing, lipid bilayer of the mitochondrial envelope [goid 5741] [evidence IEA]; The inner, i.e. lumen-facing, lipid bilayer of the mitochondrial envelop…	"Interacting selectively with iron (Fe) ions [goid 5506] [evidence IEA]; Interacting selectively with heme, any compound of iron complexed in a porphyrin (tetrapyrrole) ring [goid 20037] [evidence IEA]"	"The directed movement of substances (such as macromolecules, small molecules, ions) into, out of, within or between cells, or within a multicellular organism [goid 6810] [evidence IEA]; A process whereby a series of electron carriers operate together to transfer electrons from donors to any of several different terminal electron acceptors to generate a transmembrane electrochemical gradient [goi…	+	68055009-68055058	ILMN_1684321	CTCCATTTTCCAAAAGTAAGAGACTCCAGCATGGCCTTCTGTTTGCCCCG	1627	S	510474	NP_085056.2	NM_030579.2	NM_030579.1	RefSeq	NM_030579.2	Homo sapiens	CYB5B	OMB5; CYB5-M; DKFZp686M0619	CYB5B	ILMN_432
0.5682	NM_199250.1	2850630	19	19q13.33c	"Homo sapiens chromosome 19 open reading frame 48 (C19orf48), mRNA."	84798	40548383	C19ORF48	MGC13170				-	55992778-55992827	ILMN_1759184	GCAGGCCAAGCAGGGCAACCCCACACCCTTGACATAAAAGCATCTTGAAG	1449	A	2850630	NP_954858.1	NM_199250.1	NM_199249.1	RefSeq	NM_199250.1	Homo sapiens	C19orf48	MGC13170	C19ORF48	ILMN_17977
0.569297	NM_024808.2	580719	13	13q22.1a	"Homo sapiens chromosome 13 open reading frame 34 (C13orf34), mRNA."	79866	38505206	C13ORF34	BORA; RP11-342J4.2; FLJ22624				+	72227391-72227440	ILMN_1761486	GTTCCTCGCATATATCGTTGTGCACAGGATCAACATGATGGTGACTGGGA	1835	S	580719	NP_079084.2	NM_024808.2	NM_024808.2	RefSeq	NM_024808.2	Homo sapiens	C13orf34	BORA; RP11-342J4.2; FLJ22624	C13ORF34	ILMN_162859
0.569608	NM_016095.1	6020735	16	16q24.1b	"Homo sapiens GINS complex subunit 2 (Psf2 homolog) (GINS2), mRNA."	51659	7706366	GINS2	Pfs2; PSF2; HSPC037	"A membrane-bounded organelle of eukaryotic cells in which chromosomes are housed and replicated. In most cells, the nucleus contains all of the cell's chromosomes except the organellar chromosomes, and is the site of RNA synthesis and processing. In some species, or in specialized cell types, RNA metabolism or DNA replication may be absent [goid 5634] [evidence IEA]"	Interacting selectively with any protein or protein complex (a complex of two or more proteins that may include other nonprotein molecules) [goid 5515] [pmid 17525332] [evidence IPI]	The process whereby new strands of DNA are synthesized. The template for replication can either be an existing DNA molecule or RNA [goid 6260] [evidence IEA]	-	84268826-84268875	ILMN_1809590	GGTGGCTCACAGAGAAGGATGGCAGATGGTGCAGCCAACAATGCTGACCG	1077	S	6020735	NP_057179.1	NM_016095.1	NM_016095.1	RefSeq	NM_016095.1	Homo sapiens	GINS2	Pfs2; PSF2; HSPC037	GINS2	ILMN_26854
0.56977	NM_022145.3	5700086	5	5q12.3b	"Homo sapiens centromere protein K (CENPK), mRNA."	64105	115583645	CENPK	AF5alpha; P33; Solt	"The region of a chromosome that includes the centromere and associated proteins. In monocentric chromosomes, this region corresponds to a single area of the chromosome, whereas in holocentric chromosomes, it is evenly distributed along the chromosome [goid 775] [evidence IEA]; A membrane-bounded organelle of eukaryotic cells in which chromosomes are housed and replicated. In most cells, the nucl…	Interacting selectively with any protein or protein complex (a complex of two or more proteins that may include other nonprotein molecules) [goid 5515] [evidence IEA]	"Any process that activates or increases the frequency, rate or extent of transcription from the RNA polymerase II promoter [goid 45944] [evidence IEA]"	-	64853096-64853111:64857290-64857323	ILMN_1737195	CTGCTGCGTAATGGAATTGCCTTGAGACATCCAGAAGATCCAACCCGAAT	948	S	5700086	NP_071428.2	NM_022145.3	NM_022145.2	RefSeq	NM_022145.3	Homo sapiens	CENPK	AF5alpha; P33; FKSG14; CENP-K; Solt	CENPK	ILMN_169351
0.571214	NM_001168.2	1230682	17	17q25.3b	"Homo sapiens baculoviral IAP repeat-containing 5 (BIRC5), transcript variant 1, mRNA."	332	59859877	BIRC5	API4; EPR-1	"The region of a chromosome that includes the centromere and associated proteins. In monocentric chromosomes, this region corresponds to a single area of the chromosome, whereas in holocentric chromosomes, it is evenly distributed along the chromosome [goid 775] [pmid 16291752] [evidence IDA]; The region of a chromosome that includes the centromere and associated proteins. In monocentric chromoso…	"[goid 4869] [evidence IEA]; Interacting selectively with any protein or protein complex (a complex of two or more proteins that may include other nonprotein molecules) [goid 5515] [pmid 12773388] [evidence IPI]; Interacting selectively with any protein or protein complex (a complex of two or more proteins that may include other nonprotein molecules) [goid 5515] [pmid 15628841] [evidence IPI]; In…	"Progression from G2 phase to M phase of the mitotic cell cycle [goid 86] [pmid 9859993] [evidence IDA]; Progression from G2 phase to M phase of the mitotic cell cycle [goid 86] [evidence ISS]; A cellular process resulting in the division of the cytoplasm of a cell and its separation into two daughter cells. Cytokinesis usually occurs after growth, replication, and segregation of cellular compone…	+	73732969-73733018	ILMN_2349459	GCACCTGAAAGCTTCCTCGACATCTGTTAATAAAGCCGTAGGCCCTTGTC	2289	A	1230682	NP_001159.2	NM_001168.2	NM_001168.2	RefSeq	NM_001168.2	Homo sapiens	BIRC5	EPR-1; API4	BIRC5	ILMN_20443
0.571414	NM_002388.3	6290494	6	6p12.2a	"Homo sapiens minichromosome maintenance complex component 3 (MCM3), mRNA."	4172	33356548	MCM3	RLFB; HCC5; P1-MCM3; MGC1157; P1.h	"A membrane-bounded organelle of eukaryotic cells in which chromosomes are housed and replicated. In most cells, the nucleus contains all of the cell's chromosomes except the organellar chromosomes, and is the site of RNA synthesis and processing. In some species, or in specialized cell types, RNA metabolism or DNA replication may be absent [goid 5634] [pmid 18029348] [evidence IDA]; A small, den…	"Interacting selectively with a nucleotide, any compound consisting of a nucleoside that is esterified with (ortho)phosphate or an oligophosphate at any hydroxyl group on the ribose or deoxyribose moiety [goid 166] [evidence IEA]; Interacting selectively with DNA (deoxyribonucleic acid) [goid 3677] [evidence IEA]; Interacting selectively with ATP, adenosine 5'-triphosphate, a universally importan…	"The process whereby new strands of DNA are synthesized. The template for replication can either be an existing DNA molecule or RNA [goid 6260] [evidence IEA]; The process whereby new strands of DNA are synthesized. The template for replication can either be an existing DNA molecule or RNA [goid 6260] [pmid 12791985] [evidence EXP]; The process by which DNA replication is started; this involves t…	-	52237345-52237394	ILMN_1806818	CAGGATGACAATCAGGTCATGGTGTCTGAGGGCATCATCTTCCTCATCTG	2487	S	6290494	NP_002379.2	NM_002388.3	NM_002388.3	RefSeq	NM_002388.3	Homo sapiens	MCM3	RLFB; HCC5; P1-MCM3; MGC1157; P1.h	MCM3	ILMN_25553
0.571531	NM_207418.2	1090725	1	1q21.1a	"Homo sapiens family with sequence similarity 72, member D (FAM72D), mRNA."	728833	48675831	FAM72D	RP11-312O7.1; MGC57827; GCUD2				+	111130-111179	ILMN_1719870	GCATTCAGAGCTACAAAGGAATAGGAAAGTAGGGTAGTGTTGGATTCTGG	2157	S	1090725	NP_997301.2	NM_207418.2	NM_207418.2	RefSeq	NM_207418.2	Homo sapiens	FAM72D	RP11-312O7.1; MGC57827; GCUD2	FAM72D	ILMN_19354
0.572054	NM_004169.3	2690528	17	17p11.2f	"Homo sapiens serine hydroxymethyltransferase 1 (soluble) (SHMT1), transcript variant 1, mRNA."	6470	22547185	SHMT1	MGC15229; SHMT; CSHMT; MGC24556	"All of the contents of a cell excluding the plasma membrane and nucleus, but including other subcellular structures [goid 5737] [evidence IEA]; A semiautonomous, self replicating organelle that occurs in varying numbers, shapes, and sizes in the cytoplasm of virtually all eukaryotic cells. It is notably the site of tissue respiration [goid 5739] [evidence IEA]; That part of the cytoplasm that do…	"Catalysis of a biochemical reaction at physiological temperatures. In biologically catalyzed reactions, the reactants are known as substrates, and the catalysts are naturally occurring macromolecular substances known as enzymes. Enzymes possess specific binding sites for substrates, and are usually composed wholly or largely of protein, but RNA that has catalytic activity (ribozyme) is often als…	"The chemical reactions and pathways involving glycine, aminoethanoic acid [goid 6544] [evidence IEA]; The chemical reactions and pathways involving L-serine, the levorotatory isomer of 2-amino-3-hydroxypropanoic acid [goid 6563] [evidence IEA]; The chemical reactions and pathways involving glycine, aminoethanoic acid [goid 6544] [evidence IEA]; The chemical reactions and pathways involving L-ser…	-	18231380-18231429	ILMN_1811933	CCAGGCTTTCCTGCTCCACCTGAGATAACCAACTCCCTCCCGTAATCAGG	2276	A	2690528	NP_004160.3	NM_004169.3	NM_148918.1	RefSeq	NM_004169.3	Homo sapiens	SHMT1	MGC15229; MGC24556; SHMT; CSHMT	SHMT1	ILMN_18055
0.572091	NM_201557.2	6110025	2	2q12.2a	"Homo sapiens four and a half LIM domains 2 (FHL2), transcript variant 4, mRNA."	2274	87159833	FHL2	SLIM3; AAG11; DRAL	"A membrane-bounded organelle of eukaryotic cells in which chromosomes are housed and replicated. In most cells, the nucleus contains all of the cell's chromosomes except the organellar chromosomes, and is the site of RNA synthesis and processing. In some species, or in specialized cell types, RNA metabolism or DNA replication may be absent [goid 5634] [pmid 9150430] [evidence TAS]; All of the co…	The function of a transcription cofactor that activates transcription from a RNA polymerase II promoter; does not bind DNA itself [goid 3713] [pmid 15572661] [evidence NAS]; Interacting selectively with zinc (Zn) ions [goid 8270] [evidence IEA]; Interacting selectively with an identical protein or proteins [goid 42802] [pmid 18255255] [evidence IPI]; Interacting selectively with any metal ion [go…	"The synthesis of either RNA on a template of DNA or DNA on a template of RNA [goid 6350] [evidence IEA]; Any process that modulates the frequency, rate or extent of transcription from an RNA polymerase II promoter [goid 6357] [evidence IEA]; Any series of molecular signals generated as a consequence of an androgen binding to its receptor [goid 30521] [pmid 15572661] [evidence NAS]; Any process t…	-	105344061-105344110	ILMN_1668411	CACCCAGGCAATCTTGCCTTCTGGTTTCTTCCAGCCACATTGAGACTTTC	1030	A	6110025	NP_963851.2	NM_201557.2	NM_001450.3	RefSeq	NM_201557.2	Homo sapiens	FHL2	SLIM3; AAG11; DRAL	FHL2	ILMN_42988
0.572312	NM_024057.2	3890544	12	12q23.2a	"Homo sapiens nucleoporin 37kDa (NUP37), mRNA."	79023	34222120	NUP37	MGC5585; p37; FLJ22618	"A membrane-bounded organelle of eukaryotic cells in which chromosomes are housed and replicated. In most cells, the nucleus contains all of the cell's chromosomes except the organellar chromosomes, and is the site of RNA synthesis and processing. In some species, or in specialized cell types, RNA metabolism or DNA replication may be absent [goid 5634] [evidence IEA]; The double lipid bilayer enc…		"The directed movement of proteins into, out of, within or between cells [goid 15031] [evidence IEA]; The directed movement of mRNA, messenger ribonucleic acid, into, out of, within or between cells [goid 51028] [evidence IEA]; The directed movement of proteins in a cell, from one side of a membrane to another [goid 65002] [evidence IEA]"	-	102468161-102468210	ILMN_1771903	GACTGTCCTGGCATCGAACTCTCCCTCTGTGTGTAATTGGAGGAGACCAC	967	S	3890544	NP_076962.2	NM_024057.2	NM_024057.2	RefSeq	NM_024057.2	Homo sapiens	NUP37	MGC5585; p37; FLJ22618	NUP37	ILMN_4147
0.572916	NM_002947.3	4150458	7	7p21.3e	"Homo sapiens replication protein A3, 14kDa (RPA3), mRNA."	6119	52851430	RPA3	REPA3	"A membrane-bounded organelle of eukaryotic cells in which chromosomes are housed and replicated. In most cells, the nucleus contains all of the cell's chromosomes except the organellar chromosomes, and is the site of RNA synthesis and processing. In some species, or in specialized cell types, RNA metabolism or DNA replication may be absent [goid 5634] [evidence IEA]; That part of the nuclear con…	Interacting selectively with single-stranded DNA [goid 3697] [pmid 8454588] [evidence TAS]	The removal of the oligonucleotide that contains the DNA damage. The oligonucleotide is formed by dual incisions that flank the site of DNA damage [goid 718] [pmid 10583946] [evidence EXP]; The process whereby new strands of DNA are synthesized. The template for replication can either be an existing DNA molecule or RNA [goid 6260] [pmid 12791985] [evidence EXP]; The process whereby new strands of…	-	7680227-7680276	ILMN_1716895	TCTCTGGAATTGTGGAAGTGGTTGGAAGAGTAACCGCCAAGGCCACCATC	1360	S	4150458	NP_002938.1	NM_002947.3	NM_002947.3	RefSeq	NM_002947.3	Homo sapiens	RPA3	REPA3	RPA3	ILMN_29134
0.572969	NM_020685.3	6650079	3	3p14.2b	"Homo sapiens chromosome 3 open reading frame 14 (C3orf14), mRNA."	57415	34222336	C3ORF14	HT021				+	62292088-62292114:62293970-62293992	ILMN_2224486	CCACGGCCTGAGGTGGTTTCTCTTGAGACTCGTTACTGGGCATCAGTAGA	350	S	6650079	NP_065736.1	NM_020685.3	NM_020685.3	RefSeq	NM_020685.3	Homo sapiens	C3orf14	HT021	C3ORF14	ILMN_14506
0.573456	NM_001182.2	70102	5	5q23.2e	"Homo sapiens aldehyde dehydrogenase 7 family, member A1 (ALDH7A1), mRNA."	501	66348118	ALDH7A1	ATQ1; EPD; PDE	"The part of a cell or its extracellular environment in which a gene product is located. A gene product may be located in one or more parts of a cell and its location may be as specific as a particular macromolecular complex, that is, a stable, persistent association of macromolecules that function together [goid 5575] [evidence ND ]; A semiautonomous, self replicating organelle that occurs in va…	"Catalysis of the reaction: an aldehyde + NAD+ + H2O = an acid + NADH + H+ [goid 4029] [evidence ISS]; Catalysis of the reaction: L-2-aminoadipate 6-semialdehyde + NADP+ + H2O = L-2-aminoadipate + NADPH + H+ [goid 4043] [evidence IEA]; Catalysis of an oxidation-reduction (redox) reaction, a reversible chemical reaction in which the oxidation state of an atom or atoms within a molecule is altered.…	"The chemical reactions and pathways involving aldehydes, any organic compound with the formula R-CH=O, as carried out by individual cells [goid 6081] [evidence ISS]; The series of events required for an organism to receive an auditory stimulus, convert it to a molecular signal, and recognize and characterize the signal. Sonic stimuli are detected in the form of vibrations and are processed to fo…	-	125908404-125908453	ILMN_1687508	GACTGTGACAGTGACTAATCCCCCTATGACCCCAAAGCCCTGATTAAATC	1772	I	70102	NP_001173.1	NM_001182.2	NM_001182.2	RefSeq	NM_001182.2	Homo sapiens	ALDH7A1	ATQ1; PDE; EPD	ALDH7A1	ILMN_11622
0.57399	NM_002916.3	7210435	3	3q27.3a	"Homo sapiens replication factor C (activator 1) 4, 37kDa (RFC4), transcript variant 1, mRNA."	5984	31881681	RFC4	A1; RFC37; MGC27291	"A membrane-bounded organelle of eukaryotic cells in which chromosomes are housed and replicated. In most cells, the nucleus contains all of the cell's chromosomes except the organellar chromosomes, and is the site of RNA synthesis and processing. In some species, or in specialized cell types, RNA metabolism or DNA replication may be absent [goid 5634] [evidence IEA]; That part of the nuclear con…	"Interacting selectively with a nucleotide, any compound consisting of a nucleoside that is esterified with (ortho)phosphate or an oligophosphate at any hydroxyl group on the ribose or deoxyribose moiety [goid 166] [evidence IEA]; Catalysis of the reaction: ATP + H2O = ADP + phosphate to drive the opening of the ring structure of the PCNA complex, or any of the related sliding clamp complexes, an…	"The process whereby new strands of DNA are synthesized. The template for replication can either be an existing DNA molecule or RNA [goid 6260] [pmid 15504738] [evidence NAS]; The process whereby new strands of DNA are synthesized. The template for replication can either be an existing DNA molecule or RNA [goid 6260] [pmid 12791985] [evidence EXP]; The process by which a DNA strand is synthesized…	-	187993037-187993086	ILMN_2370365	TGAACCCCTGACCTCTAGATGTTCAAAATTCCGCTTCAAGCCTCTGTCAG	784	A	7210435	NP_002907.1	NM_002916.3	NM_002916.3	RefSeq	NM_002916.3	Homo sapiens	RFC4	A1; RFC37; MGC27291	RFC4	ILMN_181426
0.574498	NM_032359.2	3610372	3	3q12.1c	"Homo sapiens chromosome 3 open reading frame 26 (C3orf26), mRNA."	84319	34147422	C3ORF26	MGC4308				+	99897175-99897224	ILMN_2215545	GGAAATGGGAGTGCTCAGTCTGTGCAAGTCAGAATCCTTGAAACTGGGCC	926	S	3610372	NP_115735.1	NM_032359.2	NM_032359.2	RefSeq	NM_032359.2	Homo sapiens	C3orf26	MGC4308	C3ORF26	ILMN_8276
0.574512	NM_007317.1	10326	16	16p11.2d	"Homo sapiens kinesin family member 22 (KIF22), mRNA."	3835	6453817	KIF22	KNSL4; OBP-1; KID; OBP-2; OBP	"A multisubunit complex that is located at the centromeric region of DNA and provides an attachment point for the spindle microtubules [goid 776] [pmid 8599929] [evidence TAS]; The living contents of a cell; the matter contained within (but not including) the plasma membrane, usually taken to exclude large vacuoles and masses of secretory or ingested material. In eukaryotes it includes the nucleu…	"Interacting selectively with a nucleotide, any compound consisting of a nucleoside that is esterified with (ortho)phosphate or an oligophosphate at any hydroxyl group on the ribose or deoxyribose moiety [goid 166] [evidence IEA]; Catalysis of movement along a microtubule, coupled to the hydrolysis of a nucleoside triphosphate (usually ATP) [goid 3777] [pmid 8599929] [evidence TAS]; Interacting s…	"Movement of organelles, other microtubules and other particles along microtubules, mediated by motor proteins [goid 7018] [evidence IEA]; Progression through mitosis, the division of the eukaryotic cell nucleus to produce two daughter nuclei that, usually, contain the identical chromosome complement to their mother [goid 7067] [pmid 8599929] [evidence TAS]"	+	29723941-29723990	ILMN_3234884	GAGGACCTGGAACGCGTGGAGGGCATAACGGGGAAACAGATGGAGTCCTT	1918	S	10326	NP_015556.1	NM_007317.1	NM_007317.1	RefSeq	NM_007317.1	Homo sapiens	KIF22	KNSL4; OBP-1; KID; OBP-2; OBP	KIF22	ILMN_526
0.575236	NM_003920.2	4180050	12	12q13.2c	"Homo sapiens timeless homolog (Drosophila) (TIMELESS), mRNA."	8914	52851463	TIMELESS	TIM; FLJ12640; TIM1; FLJ20714; hTIM	"The ordered and organized complex of DNA and protein that forms the chromosome in the nucleus [goid 790] [pmid 17102137] [evidence IDA]; A membrane-bounded organelle of eukaryotic cells in which chromosomes are housed and replicated. In most cells, the nucleus contains all of the cell's chromosomes except the organellar chromosomes, and is the site of RNA synthesis and processing. In some specie…	Interacting selectively with any protein or protein complex (a complex of two or more proteins that may include other nonprotein molecules) [goid 5515] [evidence ISS]; Interacting selectively with a nonidentical protein to form a heterodimer [goid 46982] [evidence ISS]	"The process by which the anatomical structures of epithelia are generated and organized. Morphogenesis pertains to the creation of form. An epithelium consists of closely packed cells arranged in one or more layers, that covers the outer surfaces of the body or lines any internal cavity or tube [goid 2009] [evidence ISS]; Any process that modulates the frequency, rate or extent of DNA-dependent …	-	55097382-55097431	ILMN_1735093	TGGTCTGTTCCTTTGGCTTTCTCTTGGAGGTGGGTCGCAGCACCAGATGG	4096	S	4180050	NP_003911.1	NM_003920.2	NM_003920.2	RefSeq	NM_003920.2	Homo sapiens	TIMELESS	TIM; FLJ12640; TIM1; FLJ20714; hTIM	TIMELESS	ILMN_21369
0.575781	NM_003500.2	1010114	3	3p14.3a	"Homo sapiens acyl-Coenzyme A oxidase 2, branched chain (ACOX2), mRNA."	8309	51558754	ACOX2	BRCOX; THCCox; BCOX; BRCACOX	"A small, membrane-bounded organelle that uses dioxygen (O2) to oxidize organic molecules; contains some enzymes that produce and others that degrade hydrogen peroxide (H2O2) [goid 5777] [pmid 8943006] [evidence NAS]"	"Catalysis of the reaction: acyl-CoA + acceptor = 2,3-dehydroacyl-CoA + reduced acceptor [goid 3995] [evidence IEA]; Catalysis of the reaction: acyl-CoA + O2 = trans-2,3-dehydroacyl-CoA + H2O2 [goid 3997] [pmid 8943006] [evidence TAS]; Any molecular entity that serves as an electron acceptor and electron donor in an electron transport system [goid 9055] [evidence IEA]; Catalysis of the reaction: …	"The chemical reactions and pathways involving lipids, compounds soluble in an organic solvent but not, or sparingly, in an aqueous solvent. Includes fatty acids; neutral fats, other fatty-acid esters, and soaps; long-chain (fatty) alcohols and waxes; sphingoids and other long-chain bases; glycolipids, phospholipids and sphingolipids; and carotenes, polyprenols, sterols, terpenes and other isopre…	-	58466045-58466053:58469660-58469700	ILMN_1685703	CGCCTGTTCCAGTGGGCTCAGAAGTCACCAACCAATACTCAGGAGAACCC	2104	S	1010114	NP_003491.1	NM_003500.2	NM_003500.2	RefSeq	NM_003500.2	Homo sapiens	ACOX2	BRCOX; THCCox; BCOX; BRCACOX	ACOX2	ILMN_27517
0.576136	XM_059047	1660056			"PREDICTED: Homo sapiens hypothetical LOC126435 (LOC126435), mRNA"		51474918	HS.176498							ILMN_1868866	CGGGATCCGCCGGCTGCCTCCATCCCAGAAGAGTGCGCAGAGAATTAAAT	437	S	1660056			Hs.176498	Unigene	Hs.176498	Homo sapiens			HS.176498	ILMN_80530	Hs.176498
0.576441	NM_181800.1	4260368	20	20q13.12b	"Homo sapiens ubiquitin-conjugating enzyme E2C (UBE2C), transcript variant 3, mRNA."	11065	32967284	UBE2C	UBCH10; dJ447F3.2	That part of the nuclear content other than the chromosomes or the nucleolus [goid 5654] [pmid 15029244] [evidence EXP]; That part of the nuclear content other than the chromosomes or the nucleolus [goid 5654] [pmid 10548110] [evidence EXP]; That part of the nuclear content other than the chromosomes or the nucleolus [goid 5654] [pmid 11340163] [evidence EXP]; That part of the cytoplasm that does…	"Catalysis of ATP-dependent isopeptide bond formation between the carboxy-terminal residues of a small conjugating protein such as ubiquitin or a ubiquitin-like protein, and a substrate lysine residue. This function may be performed alone or in conjunction with an E3, ubiquitin-like protein ligase [goid 19787] [evidence IEA]; Catalysis of the ligation of two substances with concomitant breaking o…	"The covalent alteration of one or more amino acids occurring in a protein after the protein has been completely translated and released from the ribosome [goid 43687] [evidence IEA]; Any process that modulates the frequency, rate or extent of the chemical reactions and pathways involving a protein [goid 51246] [evidence IEA]; The chemical reactions and pathways resulting in the breakdown of a pr…	+	43877911-43877959:43878755-43878755	ILMN_2301083	GATAGTCCCTTGAACACACATGCTGCCGAGCTCTGGAAAAACCCCACAGC	426	A	4260368	NP_861516.1	NM_181800.1	NM_181800.1	RefSeq	NM_181800.1	Homo sapiens	UBE2C	UBCH10; dJ447F3.2	UBE2C	ILMN_25999
0.577434	NM_003542.3	3890349	6	6p22.1d	"Homo sapiens histone cluster 1, H4c (HIST1H4C), mRNA."	8364	21071024	HIST1H4C	H4FG; dJ221C16.1; H4/g				+	26104435-26104484	ILMN_2075334	TAGTATATGCCCTAAAACGTCAGGGGCGCACTCTGTATGGCTTCGGCGGC	260	S	3890349	NP_003533.1	NM_003542.3	NM_003542.3	RefSeq	NM_003542.3	Homo sapiens	HIST1H4C	H4FG; dJ221C16.1; H4/g	HIST1H4C	ILMN_30043
0.577853	NM_199413.1	2070494	15	15q26.1c	"Homo sapiens protein regulator of cytokinesis 1 (PRC1), transcript variant 2, mRNA."	9055	40807442	PRC1	MGC1671; ASE1; MGC3669	"A membrane-bounded organelle of eukaryotic cells in which chromosomes are housed and replicated. In most cells, the nucleus contains all of the cell's chromosomes except the organellar chromosomes, and is the site of RNA synthesis and processing. In some species, or in specialized cell types, RNA metabolism or DNA replication may be absent [goid 5634] [pmid 9885575] [evidence TAS]; All of the co…	Interacting selectively with any protein or protein complex (a complex of two or more proteins that may include other nonprotein molecules) [goid 5515] [pmid 14744859] [evidence IPI]	"Lengthening of the distance between poles of the mitotic spindle [goid 22] [pmid 9885575] [evidence TAS]; A cellular process resulting in the division of the cytoplasm of a cell and its separation into two daughter cells. Cytokinesis usually occurs after growth, replication, and segregation of cellular components [goid 910] [pmid 9885575] [evidence TAS]; The progression of biochemical and morpho…	-	91509500-91509549	ILMN_1728934	CATGTCACTACTGGGGAGGTGTTCCTGCTCTAGCTTCCACGATGAGGCGC	2789	A	2070494	NP_955445.1	NM_199413.1	NM_003981.2	RefSeq	NM_199413.1	Homo sapiens	PRC1	MGC1671; ASE1; MGC3669	PRC1	ILMN_22512
0.580527	NM_197964.3	5720102	7	7q34b	"Homo sapiens chromosome 7 open reading frame 55 (C7orf55), nuclear gene encoding mitochondrial protein, mRNA."	154791	188219594	C7ORF55					+	139026229-139026268:139030247-139030256	ILMN_3238680	GGCCTATCGGTACCTTGTGAAGGCTTTCCGTGCACATCGGGTCACCAGTG	333	S	5720102	NP_932068.2	NM_197964.3	NM_197964.3	RefSeq	NM_197964.3	Homo sapiens	C7orf55		C7ORF55	ILMN_364960
0.580988	NM_145647.2	6040554	8	8q24.13b	"Homo sapiens WD repeat domain 67 (WDR67), mRNA."	93594	142372580	WDR67	Gm85; MGC126773; MGC104222; MGC138159; MGC21654	"The living contents of a cell; the matter contained within (but not including) the plasma membrane, usually taken to exclude large vacuoles and masses of secretory or ingested material. In eukaryotes it includes the nucleus and cytoplasm [goid 5622] [evidence IEA]"	Increases the rate of GTP hydrolysis by a GTPase of the Rab family [goid 5097] [evidence IEA]	Any process that modulates the activity of a GTPase of the Rab family [goid 32313] [evidence IEA]	+	124233315-124233360:124233361-124233364	ILMN_1744240	CCGGGCTCGTCACAGATGTCAAACCCCTCATCTTTTGGCTGCATAGAATG	3246	S	6040554	NP_663622.1	NM_145647.2	NM_145647.1	RefSeq	NM_145647.2	Homo sapiens	WDR67	Gm85; MGC126773; MGC104222; MGC138159; MGC21654	WDR67	ILMN_20846
0.582747	NM_001003725.1	4220180	17	17q23.3a	"Homo sapiens WD repeat domain 68 (WDR68), transcript variant 2, mRNA."	10238	51242963	WDR68	AN11; HAN11	"All of the contents of a cell excluding the plasma membrane and nucleus, but including other subcellular structures [goid 5737] [pmid 9192870] [evidence TAS]"	Interacting selectively with any protein or protein complex (a complex of two or more proteins that may include other nonprotein molecules) [goid 5515] [pmid 14593110] [evidence IPI]		+	59020208-59020257	ILMN_1706706	CTCAGCCCGACTGGATCGCCATCTGCTACAACAACTGCCTGGAGATACTC	1188	A	4220180	NP_001003725.1	NM_001003725.1	NM_001003725.1	RefSeq	NM_001003725.1	Homo sapiens	WDR68	AN11; HAN11	WDR68	ILMN_19537
0.583237	NM_002882.2	7000735	22	22q11.21d	"Homo sapiens RAN binding protein 1 (RANBP1), mRNA."	5902	6382077	RANBP1	MGC88701	"A membrane-bounded organelle of eukaryotic cells in which chromosomes are housed and replicated. In most cells, the nucleus contains all of the cell's chromosomes except the organellar chromosomes, and is the site of RNA synthesis and processing. In some species, or in specialized cell types, RNA metabolism or DNA replication may be absent [goid 5634] [pmid 16130169] [evidence TAS]; All of the c…	"Prevents the dissociation of GDP from a GTPase, thereby preventing GTP from binding [goid 5092] [pmid 7616957] [evidence TAS]; Increases the activity of a GTPase, an enzyme that catalyzes the hydrolysis of GTP [goid 5096] [evidence IEA]; Interacting selectively with any protein or protein complex (a complex of two or more proteins that may include other nonprotein molecules) [goid 5515] [pmid 17…	"The directed movement of substances within a cell [goid 46907] [evidence IEA]; A process that is carried out at the cellular level which results in the formation, arrangement of constituent parts, or disassembly of the spindle, the array of microtubules and associated molecules that forms between opposite poles of a eukaryotic cell during DNA segregation and serves to move the duplicated chromos…	+	18489797-18489846	ILMN_1721457	CTGTTCCGATTTGCCTCTGAGAACGATCTCCCAGAATGGAAGGAGCGAGG	312	S	7000735	NP_002873.1	NM_002882.2	NM_002882.2	RefSeq	NM_002882.2	Homo sapiens	RANBP1	MGC88701	RANBP1	ILMN_25664
0.58459	NM_018121.2	6510368	10	10q24.31a	"Homo sapiens chromosome 10 open reading frame 6 (C10orf6), mRNA."	55719	27532981	C10ORF6					+	102714680-102714729	ILMN_1710207	CAGTGTCGGCGCACCTCATTATCTGTGCATTTGTTTTTCCTGGGCAGTCC	7085	S	6510368	NP_060591.2	NM_018121.2	NM_018121.2	RefSeq	NM_018121.2	Homo sapiens	C10orf6		C10ORF6	ILMN_24540
0.584817	NM_004111.4	1010719	11	11q12.2b	"Homo sapiens flap structure-specific endonuclease 1 (FEN1), mRNA."	2237	19718776	FEN1	RAD2; FEN-1; MF1	"A membrane-bounded organelle of eukaryotic cells in which chromosomes are housed and replicated. In most cells, the nucleus contains all of the cell's chromosomes except the organellar chromosomes, and is the site of RNA synthesis and processing. In some species, or in specialized cell types, RNA metabolism or DNA replication may be absent [goid 5634] [pmid 7961795] [evidence IDA]"	"Interacting selectively with magnesium (Mg) ions [goid 287] [evidence IEA]; Interacting selectively with damaged DNA [goid 3684] [pmid 8007985] [evidence TAS]; Interacting selectively with double-stranded DNA [goid 3690] [pmid 8131753] [evidence TAS]; Catalysis of the hydrolysis of ester linkages within nucleic acids by creating internal breaks [goid 4519] [pmid 8131753] [evidence TAS]; Catalysi…	"The process whereby new strands of DNA are synthesized. The template for replication can either be an existing DNA molecule or RNA [goid 6260] [pmid 15504738] [evidence NAS]; The repair of double-strand breaks in DNA via homologous and nonhomologous mechanisms to reform a continuous DNA helix [goid 6302] [pmid 8131753] [evidence TAS]; Any process by which an organism or cell protects itself from…	+	61320359-61320408	ILMN_1755834	CTGAGGAGCGAATCCGCAGTGGGGTCAAGAGGCTGAGTAAGAGCCGCCAA	1322	S	1010719	NP_004102.1	NM_004111.4	NM_004111.4	RefSeq	NM_004111.4	Homo sapiens	FEN1	RAD2; FEN-1; MF1	FEN1	ILMN_162686
0.585186	NR_002987.1	3990497	1	1p35.3b	"Homo sapiens small nucleolar RNA, H/ACA box 61 (SNORA61), small nucleolar RNA."	677838	91680853	SNORA61	ACA61				-	28906352-28906401	ILMN_3245458	CTCCTGATCCCTTTCCCATCGGATCTGAACACTGGTCTTGGTGGTCGTAA	4	S	3990497		NR_002987.1	NR_002987.1	RefSeq	NR_002987.1	Homo sapiens	SNORA61	ACA61	SNORA61	ILMN_175479
0.587875	NM_001034194.1	6220142	4	4q27c	"Homo sapiens exosome component 9 (EXOSC9), transcript variant 1, mRNA."	5393	77812671	EXOSC9	p5; PMSCL1; PM/Scl-75; p6; Rrp45p; RRP45	"Complex of 3'-5' exoribonucleases found in the nucleus [goid 176] [pmid 11879549] [evidence NAS]; A membrane-bounded organelle of eukaryotic cells in which chromosomes are housed and replicated. In most cells, the nucleus contains all of the cell's chromosomes except the organellar chromosomes, and is the site of RNA synthesis and processing. In some species, or in specialized cell types, RNA me…	"Catalysis of the sequential cleavage of mononucleotides from a free 3' terminus of an RNA molecule [goid 175] [pmid 11879549] [evidence NAS]; Interacting selectively with an RNA molecule or a portion thereof [goid 3723] [pmid 11879549] [evidence NAS]; Catalysis of the hydrolysis of ester linkages within nucleic acids by removing nucleotide residues from the 3' or 5' end [goid 4527] [evidence IEA…	Any process involved in the conversion of a primary ribosomal RNA (rRNA) transcript into one or more mature rRNA molecules [goid 6364] [pmid 11879549] [evidence NAS]; Any process involved in the conversion of one or more primary RNA transcripts into one or more mature RNA molecules [goid 6396] [evidence IEA]; Any immune system process that functions in the calibrated response of an organism to a …	+	122735042-122735091	ILMN_1721713	GACTCCTGGAACTGCCCAAATTGGAGAGGGAGTAGAAAACTCCTGGGGTG	1104	S	6220142	NP_001029366.1	NM_001034194.1	NM_005033.1	RefSeq	NM_001034194.1	Homo sapiens	EXOSC9	p5; PMSCL1; PM/Scl-75; p6; Rrp45p; RRP45	EXOSC9	ILMN_26957
0.588017	NM_001099650.1	7330131	12	12q12e	"Homo sapiens glucoside xylosyltransferase 1 (GXYLT1), transcript variant 2, mRNA."	283464	153791275	GXYLT1					-	42476024-42476073	ILMN_1747183	GCCGTAACAGAAGATCTGTGAAGAGGATGGTGGTTTGCACCTGTTCCTGA	6969	A	7330131	NP_001093120.1	NM_001099650.1	XM_290597.6	RefSeq	NM_001099650.1	Homo sapiens	GXYLT1	FLJ43151	GXYLT1	ILMN_307014
0.588383	NM_002876.2	5910215	17	17q22d	"Homo sapiens RAD51 homolog C (S. cerevisiae) (RAD51C), transcript variant 2, mRNA."	5889	17402894	RAD51C	MGC104277; RAD51L2	"A membrane-bounded organelle of eukaryotic cells in which chromosomes are housed and replicated. In most cells, the nucleus contains all of the cell's chromosomes except the organellar chromosomes, and is the site of RNA synthesis and processing. In some species, or in specialized cell types, RNA metabolism or DNA replication may be absent [goid 5634] [pmid 9469824] [evidence TAS]"	"Interacting selectively with a nucleotide, any compound consisting of a nucleoside that is esterified with (ortho)phosphate or an oligophosphate at any hydroxyl group on the ribose or deoxyribose moiety [goid 166] [evidence IEA]; Interacting selectively with DNA (deoxyribonucleic acid) [goid 3677] [pmid 9469824] [evidence TAS]; Interacting selectively with ATP, adenosine 5'-triphosphate, a unive…	"The process of restoring DNA after damage. Genomes are subject to damage by chemical and physical agents in the environment (e.g. UV and ionizing radiations, chemical mutagens, fungal and bacterial toxins, etc.) and by free radicals or alkylating agents endogenously generated in metabolism. DNA is also damaged because of errors during its replication. A variety of different DNA repair pathways h…	+	54127402-54127451	ILMN_1695386	CAGCACTGGAACTTCTTGAGCAGGAGCATACCCAGGGCTTCATAATCACC	299	A	5910215	NP_002867.1	NM_002876.2	NM_002876.2	RefSeq	NM_002876.2	Homo sapiens	RAD51C	MGC104277; RAD51L2	RAD51C	ILMN_2487
0.588744	NM_002497.2	4610669	1	1q32.3a	"Homo sapiens NIMA (never in mitosis gene a)-related kinase 2 (NEK2), mRNA."	4751	49574505	NEK2	NLK1; NEK2A; HsPK 21; HsPK21	"A highly compacted molecule of DNA and associated proteins resulting in a cytologically distinct structure that remains in the nucleus [goid 794] [evidence IEA]; Either of the ends of a spindle, where spindle microtubules are organized; usually contains a microtubule organizing center and accessory molecules, spindle microtubules and astral microtubules [goid 922] [evidence IEA]; A membrane-boun…	"Interacting selectively with a nucleotide, any compound consisting of a nucleoside that is esterified with (ortho)phosphate or an oligophosphate at any hydroxyl group on the ribose or deoxyribose moiety [goid 166] [evidence IEA]; Interacting selectively with magnesium (Mg) ions [goid 287] [evidence IEA]; Catalysis of the reaction: ATP + a protein serine/threonine = ADP + protein serine/threonine…	"The cell cycle process whereby replicated homologous chromosomes are organized and then physically separated and apportioned to two sets during the mitotic cell cycle. Each replicated chromosome, composed of two sister chromatids, aligns at the cell equator, paired with its homologous partner. One homolog of each morphologic type goes into each of the resulting chromosome sets [goid 70] [evidenc…	-	211836142-211836191	ILMN_2051373	CTGTTTAACAGAATATGAGCTGTCTGTCATTTACCTACTTCTTTCCCACT	2060	S	4610669	NP_002488.1	NM_002497.2	NM_002497.2	RefSeq	NM_002497.2	Homo sapiens	NEK2	NLK1; NEK2A; HsPK 21; HsPK21	NEK2	ILMN_14211
0.589481	NM_001032290.1	1070762	1	1p13.3b	"Homo sapiens proline/serine-rich coiled-coil 1 (PSRC1), transcript variant 4, mRNA."	84722	73858558	PSRC1	RP11-297O4.2; DDA3; MGC1780; FP3214	"All of the contents of a cell excluding the plasma membrane and nucleus, but including other subcellular structures [goid 5737] [evidence IEA]; The array of microtubules and associated molecules that forms between opposite poles of a eukaryotic cell during mitosis or meiosis and serves to move the duplicated chromosomes apart [goid 5819] [pmid 12427559] [evidence ISS]; A thin cytoplasmic bridge …	"Interacting selectively with microtubules, filaments composed of tubulin monomers [goid 8017] [pmid 12427559] [evidence ISS]"	"A process that results in a parallel arrangement of microtubules [goid 1578] [pmid 12427559] [evidence ISS]; The progression of biochemical and morphological phases and events that occur in a cell during successive cell replication or nuclear replication events. Canonically, the cell cycle comprises the replication and segregation of genetic material followed by the division of the cell, but in …	-	109822305-109822354	ILMN_1671843	CCTGAATCGCATTCTCTACTGGACTCTGGCCTGCTTGGAGAGGTGGCAGC	1634	A	1070762	NP_001027461.1	NM_001032290.1	NM_001005290.2	RefSeq	NM_001032290.1	Homo sapiens	PSRC1	RP11-297O4.2; MGC1780; FP3214; DDA3	PSRC1	ILMN_9176
0.591031	NM_002915.3	1780463	13	13q13.2a	"Homo sapiens replication factor C (activator 1) 3, 38kDa (RFC3), transcript variant 1, mRNA."	5983	108773785	RFC3	RFC38; MGC5276	"A membrane-bounded organelle of eukaryotic cells in which chromosomes are housed and replicated. In most cells, the nucleus contains all of the cell's chromosomes except the organellar chromosomes, and is the site of RNA synthesis and processing. In some species, or in specialized cell types, RNA metabolism or DNA replication may be absent [goid 5634] [evidence IEA]; A membrane-bounded organelle…	"Interacting selectively with a nucleotide, any compound consisting of a nucleoside that is esterified with (ortho)phosphate or an oligophosphate at any hydroxyl group on the ribose or deoxyribose moiety [goid 166] [evidence IEA]; Interacting selectively with DNA (deoxyribonucleic acid) [goid 3677] [evidence IEA]; Interacting selectively with ATP, adenosine 5'-triphosphate, a universally importan…	"The process whereby new strands of DNA are synthesized. The template for replication can either be an existing DNA molecule or RNA [goid 6260] [evidence IEA]; Synthesis of DNA that proceeds from the broken 3' single-strand DNA end uses the homologous intact duplex as the template [goid 731] [pmid 9488738] [evidence TAS]; The process by which a DNA strand is synthesized from template DNA during r…	+	33303469-33303491:33307285-33307311	ILMN_1658143	GTCAGTCAGCAAACTCCACAAAGGCTCCTTGAAGTTCGTGGAAGGCTGTA	897	A	1780463	NP_002906.1	NM_002915.3	NM_181558.1	RefSeq	NM_002915.3	Homo sapiens	RFC3	RFC38; MGC5276	RFC3	ILMN_11616
0.591555	NM_145018.2	2570019	11	11q14.1d	"Homo sapiens chromosome 11 open reading frame 82 (C11orf82), mRNA."	220042	25072198	C11ORF82	FLJ38838; FLJ25416; FLJ13936				+	82322969-82323018	ILMN_1790100	GGCCCACCTTCAGTGTGTGAAACTCGAAGTGCTTGGTCACCTGAATTGTT	3153	S	2570019	NP_659455.2	NM_145018.2	NM_145018.2	RefSeq	NM_145018.2	Homo sapiens	C11orf82	FLJ38838; FLJ13936; FLJ25416	C11ORF82	ILMN_11038
0.591602	NM_181803.1	5310471	20	20q13.12b	"Homo sapiens ubiquitin-conjugating enzyme E2C (UBE2C), transcript variant 6, mRNA."	11065	32967290	UBE2C	UBCH10; dJ447F3.2	That part of the nuclear content other than the chromosomes or the nucleolus [goid 5654] [pmid 15029244] [evidence EXP]; That part of the nuclear content other than the chromosomes or the nucleolus [goid 5654] [pmid 10548110] [evidence EXP]; That part of the nuclear content other than the chromosomes or the nucleolus [goid 5654] [pmid 11340163] [evidence EXP]; That part of the cytoplasm that does…	"Catalysis of ATP-dependent isopeptide bond formation between the carboxy-terminal residues of a small conjugating protein such as ubiquitin or a ubiquitin-like protein, and a substrate lysine residue. This function may be performed alone or in conjunction with an E3, ubiquitin-like protein ligase [goid 19787] [evidence IEA]; Catalysis of the ligation of two substances with concomitant breaking o…	"The covalent alteration of one or more amino acids occurring in a protein after the protein has been completely translated and released from the ribosome [goid 43687] [evidence IEA]; Any process that modulates the frequency, rate or extent of the chemical reactions and pathways involving a protein [goid 51246] [evidence IEA]; The chemical reactions and pathways resulting in the breakdown of a pr…	+	43875503-43875510:43877900-43877923:43877924-43877941	ILMN_1714730	CCCTCATGAACCCAACATTGATAGTCCCTTGAACACACATGCTGCCGAGC	202	A	5310471	NP_861519.1	NM_181803.1	NM_181803.1	RefSeq	NM_181803.1	Homo sapiens	UBE2C	UBCH10; dJ447F3.2	UBE2C	ILMN_6398
0.591693	NM_016575.1	6330348	12	12q23.3a	"Homo sapiens 5'-nucleotidase domain containing 3 (NT5DC3), transcript variant 2, mRNA."	51559	7706748	NT5DC3	TU12B1-TY; FLJ11266; TU12B1TY; GNN	That part of the cytoplasm that does not contain membranous or particulate subcellular components [goid 5829] [evidence IEA]	"Interacting selectively with magnesium (Mg) ions [goid 287] [evidence IEA]; Catalysis of the hydrolysis of various bonds, e.g. C-O, C-N, C-C, phosphoric anhydride bonds, etc. Hydrolase is the systematic name for any enzyme of EC class 3 [goid 16787] [evidence IEA]"		-	102690449-102690498	ILMN_1756049	CCTGCACGCCATTCTCCACCTCAGTATCTGCTTTCGGGGAACCCAACCTG	6735	I	6330348	NP_057659.1	NM_016575.1	NM_016575.1	RefSeq	NM_016575.1	Homo sapiens	NT5DC3	TU12B1-TY; FLJ11266; TU12B1TY; GNN	NT5DC3	ILMN_20677
0.591948	NM_001033.2	2850575	11	11p15.4d	"Homo sapiens ribonucleotide reductase M1 polypeptide (RRM1), mRNA."	6240	21071083	RRM1	RR1; R1; RIR1	"All of the contents of a cell excluding the plasma membrane and nucleus, but including other subcellular structures [goid 5737] [evidence IEA]; That part of the cytoplasm that does not contain membranous or particulate subcellular components [goid 5829] [pmid 11517226] [evidence EXP]; An enzyme complex composed of 2-4 or more subunits, which usually contains nonheme iron and requires ATP for cat…	"Interacting selectively with a nucleotide, any compound consisting of a nucleoside that is esterified with (ortho)phosphate or an oligophosphate at any hydroxyl group on the ribose or deoxyribose moiety [goid 166] [evidence IEA]; Catalysis of the reaction: 2'-deoxyribonucleoside diphosphate + thioredoxin disulfide + H2O = ribonucleoside diphosphate + thioredoxin. Thioredoxin disulfide is the oxi…	The process whereby new strands of DNA are synthesized. The template for replication can either be an existing DNA molecule or RNA [goid 6260] [evidence NAS]; The process of removal or addition of one or more electrons with or without the concomitant removal or addition of a proton or protons [goid 55114] [evidence IEA]	+	4116255-4116304	ILMN_1771593	TAGTGGGTTTGCTTGAGGTGGTAAGGCTTTGCTGGACCCTGTTGCAGGCA	2677	S	2850575	NP_001024.1	NM_001033.2	NM_001033.2	RefSeq	NM_001033.2	Homo sapiens	RRM1	RR1; R1; RIR1	RRM1	ILMN_14789
0.592305	NM_000403.3	6980162	1	1p36.11d	"Homo sapiens UDP-galactose-4-epimerase (GALE), transcript variant 1, mRNA."	2582	56237022	GALE		"A membrane-bounded organelle of eukaryotic cells in which chromosomes are housed and replicated. In most cells, the nucleus contains all of the cell's chromosomes except the organellar chromosomes, and is the site of RNA synthesis and processing. In some species, or in specialized cell types, RNA metabolism or DNA replication may be absent [goid 5634] [pmid 18029348] [evidence IDA]; All of the c…	"Catalysis of a biochemical reaction at physiological temperatures. In biologically catalyzed reactions, the reactants are known as substrates, and the catalysts are naturally occurring macromolecular substances known as enzymes. Enzymes possess specific binding sites for substrates, and are usually composed wholly or largely of protein, but RNA that has catalytic activity (ribozyme) is often als…	"The chemical reactions and pathways involving galactose, the aldohexose galacto-hexose. D-galactose is widely distributed in combined form in plants, animals and microorganisms as a constituent of oligo- and polysaccharides; it also occurs in galactolipids and as its glucoside in lactose and melibiose [goid 6012] [evidence IEA]; The chemical reactions and pathways by which individual cells trans…	-	24122239-24122288	ILMN_1792168	GGCCAAGGGCTCCACTGACCAGGAGGCCGAGGTCTCTAACTCTTATCTTC	1431	A	6980162	NP_000394.2	NM_000403.3	NM_000403.3	RefSeq	NM_000403.3	Homo sapiens	GALE		GALE	ILMN_24324
0.592435	NM_005733.1	1050195	5	5q31.2c	"Homo sapiens kinesin family member 20A (KIF20A), mRNA."	10112	5032012	KIF20A	RAB6KIFL; MKLP2; FLJ21151	"That part of the nuclear content other than the chromosomes or the nucleolus [goid 5654] [pmid 12939256] [evidence EXP]; A compound membranous cytoplasmic organelle of eukaryotic cells, consisting of flattened, ribosome-free vesicles arranged in a more or less regular stack. The Golgi apparatus differs from the endoplasmic reticulum in often having slightly thicker membranes, appearing in sectio…	"Interacting selectively with a nucleotide, any compound consisting of a nucleoside that is esterified with (ortho)phosphate or an oligophosphate at any hydroxyl group on the ribose or deoxyribose moiety [goid 166] [evidence IEA]; Catalysis of movement along a microtubule, coupled to the hydrolysis of a nucleoside triphosphate (usually ATP) [goid 3777] [evidence IEA]; Enables the directed movemen…	"Movement of organelles, other microtubules and other particles along microtubules, mediated by motor proteins [goid 7018] [evidence IEA]; The directed movement of proteins into, out of, within or between cells [goid 15031] [evidence IEA]; The directed movement of substances, either within a vesicle or in the vesicle membrane, into, out of or within a cell [goid 16192] [pmid 9438855] [evidence TA…	+	137550940-137550989	ILMN_1695658	GATCCTACGCTCACGGCGTTCCCCTTTACTCAAATCTGGGCCTTTTGGCA	2640	S	1050195	NP_005724.1	NM_005733.1	NM_005733.1	RefSeq	NM_005733.1	Homo sapiens	KIF20A	RAB6KIFL; MKLP2; FLJ21151	KIF20A	ILMN_14100
0.592615	NM_001071775.2	3170187	13	13q22.1a	"Homo sapiens chromosome 13 open reading frame 37 (C13orf37), mRNA."	440145	167860112	C13ORF37	MGC150539; FLJ21869				-	73284093-73284142	ILMN_3243945	GTGCACATCTGCTGTGCCAGGTTGAAGTATAGTGGAACCCATCAGTAGTA	764	S	3170187	NP_001065243.1	NM_001071775.2	NM_001071775.2	RefSeq	NM_001071775.2	Homo sapiens	C13orf37	MGC150539; FLJ21869	C13ORF37	ILMN_163591
0.593282	NM_001012413.1	7150128	3	3p24.3b	"Homo sapiens shugoshin-like 1 (S. pombe) (SGOL1), transcript variant C1, mRNA."	151648	60302878	SGOL1	NY-BR-85; Sgo1	"The region of a chromosome that includes the centromere and associated proteins. In monocentric chromosomes, this region corresponds to a single area of the chromosome, whereas in holocentric chromosomes, it is evenly distributed along the chromosome [goid 775] [evidence IEA]; A membrane-bounded organelle of eukaryotic cells in which chromosomes are housed and replicated. In most cells, the nucl…	Interacting selectively with any protein or protein complex (a complex of two or more proteins that may include other nonprotein molecules) [goid 5515] [pmid 16541025] [evidence IPI]	"The progression of biochemical and morphological phases and events that occur in a cell during successive cell replication or nuclear replication events. Canonically, the cell cycle comprises the replication and segregation of genetic material followed by the division of the cell, but in endocycles or syncytial cells nuclear replication or nuclear division may not be followed by cell division [g…	-	20212537-20212586	ILMN_2404906	CCTAAACGTAGGTGCACAGCCAGCGTGAACTATAAGGAGCCCACCCTCGC	753	A	7150128	NP_001012413.1	NM_001012413.1	NM_001012413.1	RefSeq	NM_001012413.1	Homo sapiens	SGOL1	NY-BR-85; Sgo1	SGOL1	ILMN_14464
0.593339	NM_004237.2	5700373	5	5p15.33d	"Homo sapiens thyroid hormone receptor interactor 13 (TRIP13), mRNA."	9319	20149561	TRIP13	16E1BP	"A membrane-bounded organelle of eukaryotic cells in which chromosomes are housed and replicated. In most cells, the nucleus contains all of the cell's chromosomes except the organellar chromosomes, and is the site of RNA synthesis and processing. In some species, or in specialized cell types, RNA metabolism or DNA replication may be absent [goid 5634] [pmid 7776974] [evidence TAS]"	"Interacting selectively with a nucleotide, any compound consisting of a nucleoside that is esterified with (ortho)phosphate or an oligophosphate at any hydroxyl group on the ribose or deoxyribose moiety [goid 166] [evidence IEA]; The function that links a sequence-specific transcription factor to the core RNA polymerase II complex but does not bind DNA itself [goid 3712] [pmid 7776974] [evidence…	"The synthesis of RNA from a DNA template by RNA polymerase II (Pol II), originating at a Pol II-specific promoter. Includes transcription of messenger RNA (mRNA) and certain small nuclear RNAs (snRNAs) [goid 6366] [pmid 7776974] [evidence TAS]"	+	970891-970940	ILMN_1796589	CGGTATGGGCGCCCCTGCATTGCTGGGATGTTTCTGCCCACGGTTTTGTT	2082	S	5700373	NP_004228.1	NM_004237.2	NM_004237.2	RefSeq	NM_004237.2	Homo sapiens	TRIP13	16E1BP	TRIP13	ILMN_15061
0.593523	NM_197964.2	1660608	7	7q34b	"Homo sapiens chromosome 7 open reading frame 55 (C7orf55), mRNA."	154791	142349471	C7ORF55					+	138680945-138680990:138680991-138680994	ILMN_1779751	TCTCAAGTTGCCCCATCAGCCTGGAGGGAAGGGCTGGGAGCCATGAACAT	353	S	1660608	NP_932068.1	NM_197964.2	NM_197964.1	RefSeq	NM_197964.2	Homo sapiens	C7orf55	HSPC268	C7ORF55	ILMN_485
0.594513	NM_024065.3	460750	2	2q11.2d	"Homo sapiens phosducin-like 3 (PDCL3), mRNA."	79031	51944951	PDCL3		"All of the contents of a cell excluding the plasma membrane and nucleus, but including other subcellular structures [goid 5737] [pmid 15371430] [evidence IDA]"	Interacting selectively with any protein or protein complex (a complex of two or more proteins that may include other nonprotein molecules) [goid 5515] [pmid 15371430] [evidence IPI]	"A form of programmed cell death induced by external or internal signals that trigger the activity of proteolytic caspases, whose actions dismantle the cell and result in cell death. Apoptosis begins internally with condensation and subsequent fragmentation of the cell nucleus (blebbing) while the plasma membrane remains intact. Other characteristics of apoptosis include DNA fragmentation and the…	+	100552582-100552615:100554484-100554499	ILMN_1667925	GCTTGTGGGTCATCTTGCACCTTTACAAACAAGGAATTCCCCTCTGTGCC	438	S	460750	NP_076970.1	NM_024065.3	XM_929879.1	RefSeq	NM_024065.3	Homo sapiens	PDCL3	VIAF1; HTPHLP; MGC3062	PDCL3	ILMN_30010
0.595045	NM_013299.3	4210692	11	11q13.1c	"Homo sapiens SAC3 domain containing 1 (SAC3D1), mRNA."	29901	118918404	SAC3D1	HSU79266; SHD1	"A structure comprised of a core structure (in most organisms, a pair of centrioles) and peripheral material from which a microtubule-based structure, such as a spindle apparatus, is organized. Centrosomes occur close to the nucleus during interphase in many eukaryotic cells, though in animal cells it changes continually during the cell-division cycle [goid 5813] [evidence IEA]; The array of micr…		"The progression of biochemical and morphological phases and events that occur in a cell during successive cell replication or nuclear replication events. Canonically, the cell cycle comprises the replication and segregation of genetic material followed by the division of the cell, but in endocycles or syncytial cells nuclear replication or nuclear division may not be followed by cell division [g…	+	64568682-64568731	ILMN_1776674	AGTGGAGAGCAAACTTCGAGGACGTACCCTGGAGGAGGTGGTCATGGCAG	1373	S	4210692	NP_037431.3	NM_013299.3	NM_013299.2	RefSeq	NM_013299.3	Homo sapiens	SAC3D1	HSU79266; SHD1	SAC3D1	ILMN_9385
0.596744	XM_001723531.1	840048		11q14.1d	"PREDICTED: Homo sapiens similar to Cks1 protein homologue (LOC729964), mRNA."	729964	169202971	LOC729964							ILMN_3220769	TCGTGCTGCCCAAGGACATAGCCAAGCTGGTCCGTAAAACCCATTTGATG	144	A	840048	XP_001723583.1	XM_001723531.1	XM_001723531.1	RefSeq	XM_001723531.1	Homo sapiens	LOC729964		LOC729964	ILMN_334514
0.597803	NM_032358.2	3850291	12	12p13.33d	"Homo sapiens coiled-coil domain containing 77 (CCDC77), mRNA."	84318	34222123	CCDC77	MGC13183				+	421920-421969	ILMN_2101375	CTGGAAAGATTCGGGAGACACTTTGCCGAGGGGATGAAGCTGAGATGATG	2109	S	3850291	NP_115734.1	NM_032358.2	NM_032358.2	RefSeq	NM_032358.2	Homo sapiens	CCDC77	MGC13183	CCDC77	ILMN_23011
0.598263	NM_001012716.1	1450682	18	18p11.32c	"Homo sapiens chromosome 18 open reading frame 56 (C18orf56), mRNA."	494514	60593053	C18ORF56					-	649651-649700	ILMN_1796074	CGTCACAGCTTTCCTGGGTTGTTGAGCCTCTAAGATGGTCTTTTCCTCTG	763	S	1450682	NP_001012734.1	NM_001012716.1	NM_001012716.1	RefSeq	NM_001012716.1	Homo sapiens	C18orf56		C18ORF56	ILMN_21911
0.598526	NM_006347.3	5130241	1	1p34.2a	"Homo sapiens peptidylprolyl isomerase H (cyclophilin H) (PPIH), mRNA."	10465	45439322	PPIH	CYPH; CYP-20; USA-CYP; MGC5016; SnuCyp-20	"A membrane-bounded organelle of eukaryotic cells in which chromosomes are housed and replicated. In most cells, the nucleus contains all of the cell's chromosomes except the organellar chromosomes, and is the site of RNA synthesis and processing. In some species, or in specialized cell types, RNA metabolism or DNA replication may be absent [goid 5634] [evidence IEA]; A ribonucleoprotein complex,…	"Catalysis of the reaction: peptidyl-proline (omega=180) = peptidyl-proline (omega=0) [goid 3755] [evidence IEA]; Interacting selectively with cyclosporin A, a cyclic undecapeptide that contains several N-methylated and unusual amino acids [goid 16018] [pmid 9570313] [evidence TAS]; Catalysis of the geometric or structural changes within one molecule. Isomerase is the systematic name for any enzy…	"Any process involved in the conversion of a primary mRNA transcript into one or more mature mRNA(s) prior to translation into polypeptide [goid 6397] [evidence IEA]; The process of assisting in the covalent and noncovalent assembly of single chain polypeptides or multisubunit complexes into the correct tertiary structure [goid 6457] [pmid 9570313] [evidence TAS]; The aggregation, arrangement and…	+	42905641-42905677:42905678-42905690	ILMN_1801913	GCTACCTGTGGTGATCTCGCAGTGTGGGGAGATGTAGTCCAGACAAAGAC	568	S	5130241	NP_006338.1	NM_006347.3	NM_006347.3	RefSeq	NM_006347.3	Homo sapiens	PPIH	CYPH; CYP-20; USA-CYP; MGC5016; SnuCyp-20	PPIH	ILMN_999
0.598586	NM_012484.1	4050400	5	5q34c	"Homo sapiens hyaluronan-mediated motility receptor (RHAMM) (HMMR), transcript variant 1, mRNA."	3161	7108348	HMMR	RHAMM; MGC119495; IHABP; MGC119494; CD168	"All of the contents of a cell excluding the plasma membrane and nucleus, but including other subcellular structures [goid 5737] [evidence IEA]; The external part of the cell wall and/or plasma membrane [goid 9986] [evidence IEA]"	"Interacting selectively with hyaluronic acid, a polymer composed of repeating dimeric units of glucuronic acid and N-acetyl glucosamine [goid 5540] [evidence IEA]; Combining with an extracellular or intracellular messenger to initiate a change in cell activity [goid 4872] [evidence IEA]"		+	162851419-162851468	ILMN_2409220	TTTCTTCAGAGTTTGTCATATACTGCTTGTCATCTGCATGTCTACTCAGC	2882	A	4050400	NP_036616.1	NM_012484.1	NM_012484.1	RefSeq	NM_012484.1	Homo sapiens	HMMR	RHAMM; MGC119495; IHABP; MGC119494; CD168	HMMR	ILMN_17450
0.598985	NM_014791.2	2340392	9	9p13.2b	"Homo sapiens maternal embryonic leucine zipper kinase (MELK), mRNA."	9833	41281490	MELK	KIAA0175; HPK38	"All of the contents of a cell excluding the plasma membrane and nucleus, but including other subcellular structures [goid 5737] [evidence IEA]"	"Interacting selectively with a nucleotide, any compound consisting of a nucleoside that is esterified with (ortho)phosphate or an oligophosphate at any hydroxyl group on the ribose or deoxyribose moiety [goid 166] [evidence IEA]; Catalysis of the reaction: ATP + a protein serine/threonine = ADP + protein serine/threonine phosphate [goid 4674] [evidence IEA]; Interacting selectively with any prot…	The process of introducing a phosphate group on to a protein [goid 6468] [evidence IEA]	+	36633149-36633197:36641743-36641743	ILMN_1731184	GTGCCAGCTTCAAAAACCCGATGTGGTGGGTATCAGGAGGCAGCGGCTTA	1983	S	2340392	NP_055606.1	NM_014791.2	NM_014791.2	RefSeq	NM_014791.2	Homo sapiens	MELK	KIAA0175; HPK38	MELK	ILMN_161976
0.599099	NM_005613.3	1710142	1	1q23.3c	"Homo sapiens regulator of G-protein signalling 4 (RGS4), mRNA."	5999	38201693	RGS4	MGC60244; SCZD9; MGC2124; RGP4		"Mediates the transfer of a signal from the outside to the inside of a cell by means other than the introduction of the signal molecule itself into the cell [goid 4871] [evidence IEA]; Mediates the transfer of a signal from the outside to the inside of a cell by means other than the introduction of the signal molecule itself into the cell [goid 4871] [evidence IEA]; Mediates the transfer of a sig…	"Any process that terminates the activity of the active enzyme MAP kinase [goid 188] [pmid 8602223] [evidence TAS]; Any process that modulates the frequency, rate or extent of G-protein coupled receptor protein signaling pathway activity [goid 8277] [pmid 10747990] [evidence TAS]; Any process that stops, prevents or reduces the frequency, rate or extent of signal transduction [goid 9968] [evidenc…	+	161312587-161312636	ILMN_1758067	CCTTTCAAAGTGCACACACACGCGTCCACATACACTGCATTCGTTGCTCC	2355	S	1710142	NP_005604.1	NM_005613.3	NM_005613.3	RefSeq	NM_005613.3	Homo sapiens	RGS4	MGC60244; SCZD9; MGC2124; RGP4	RGS4	ILMN_15378
0.599959	NM_006101.1	1050470	18	18p11.32a	"Homo sapiens NDC80 homolog, kinetochore complex component (S. cerevisiae) (NDC80), mRNA."	10403	5174456	NDC80	HEC; hsNDC80; TID3; KNTC2; HEC1	"The region of a chromosome that includes the centromere and associated proteins. In monocentric chromosomes, this region corresponds to a single area of the chromosome, whereas in holocentric chromosomes, it is evenly distributed along the chromosome [goid 775] [pmid 9315664] [evidence TAS]; A multisubunit complex that is located at the centromeric region of a condensed chromosome and provides a…	Interacting selectively with any protein or protein complex (a complex of two or more proteins that may include other nonprotein molecules) [goid 5515] [pmid 16732327] [evidence IPI]; Interacting selectively with any protein or protein complex (a complex of two or more proteins that may include other nonprotein molecules) [goid 5515] [pmid 15961401] [evidence IPI]; Interacting selectively with an…	"The cell cycle process whereby replicated homologous chromosomes are organized and then physically separated and apportioned to two sets during the mitotic cell cycle. Each replicated chromosome, composed of two sister chromatids, aligns at the cell equator, paired with its homologous partner. One homolog of each morphologic type goes into each of the resulting chromosome sets [goid 70] [pmid 93…	+	2598715-2598764	ILMN_1664511	GGAAGCAGAGGAAGAGGATGAAAAATGTGCCAGTGAGCTTGAGTCCTTGG	1661	S	1050470	NP_006092.1	NM_006101.1	NM_006101.1	RefSeq	NM_006101.1	Homo sapiens	NDC80	HEC; hsNDC80; TID3; KNTC2; HEC1	NDC80	ILMN_14098
0.6	NM_001025248.1	6280242	15	15q21.1d	"Homo sapiens deoxyuridine triphosphatase (DUT), nuclear gene encoding mitochondrial protein, transcript variant 1, mRNA."	1854	70906440	DUT	dUTPase; FLJ20622	"A semiautonomous, self replicating organelle that occurs in varying numbers, shapes, and sizes in the cytoplasm of virtually all eukaryotic cells. It is notably the site of tissue respiration [goid 5739] [evidence IEA]; A membrane-bounded organelle of eukaryotic cells in which chromosomes are housed and replicated. In most cells, the nucleus contains all of the cell's chromosomes except the orga…	"Catalysis of the reaction: dUTP + H2O = dUMP + diphosphate [goid 4170] [evidence IEA]; Catalysis of the hydrolysis of various bonds, e.g. C-O, C-N, C-C, phosphoric anhydride bonds, etc. Hydrolase is the systematic name for any enzyme of EC class 3 [goid 16787] [evidence IEA]; Interacting selectively with magnesium (Mg) ions [goid 287] [evidence IEA]; Catalysis of the reaction: dUTP + H2O = dUMP …	"The chemical reactions and pathways involving dUTP, deoxyuridine (5'-)triphosphate [goid 46080] [evidence IEA]; The chemical reactions and pathways involving nucleobases, nucleosides, nucleotides and nucleic acids [goid 6139] [pmid 1325640] [evidence TAS]; The process whereby new strands of DNA are synthesized. The template for replication can either be an existing DNA molecule or RNA [goid 6260…	+	46422761-46422810	ILMN_1732688	GAAATCAACTCAGTGGGACATAGCCAGCATTTTTGCATACCAGGTTGGGC	2045	A	6280242	NP_001020419.1	NM_001025248.1	NM_001025248.1	RefSeq	NM_001025248.1	Homo sapiens	DUT	dUTPase; FLJ20622	DUT	ILMN_163345
0.600671	NM_001034.1	510731	2	2p25.1d	"Homo sapiens ribonucleotide reductase M2 polypeptide (RRM2), mRNA."	6241	4557844	RRM2	RR2M; R2	"All of the contents of a cell excluding the plasma membrane and nucleus, but including other subcellular structures [goid 5737] [evidence NAS]; That part of the cytoplasm that does not contain membranous or particulate subcellular components [goid 5829] [pmid 11517226] [evidence EXP]"	"Catalysis of the reaction: 2'-deoxyribonucleoside diphosphate + thioredoxin disulfide + H2O = ribonucleoside diphosphate + thioredoxin. Thioredoxin disulfide is the oxidized form of thioredoxin [goid 4748] [pmid 1627826] [evidence NAS]; Interacting selectively with iron (Fe) ions [goid 5506] [evidence IEA]; Interacting selectively with any protein or protein complex (a complex of two or more pro…	"The process whereby new strands of DNA are synthesized. The template for replication can either be an existing DNA molecule or RNA [goid 6260] [evidence NAS]; The chemical reactions and pathways involving a deoxyribonucleoside diphosphate, a glycosamine consisting of a base linked to a deoxyribose sugar esterified with diphosphate on its glycose moiety [goid 9186] [evidence IEA]; The process of …	+	10187637-10187686	ILMN_1678669	GTGTCCTGGGATTCTCTGCCCCCTCTGAGTAGAGTGTTGTGGGATAAAGG	2036	S	510731	NP_001025.1	NM_001034.1	NM_001034.1	RefSeq	NM_001034.1	Homo sapiens	RRM2	RR2M; R2	RRM2	ILMN_18637
0.600838	NM_001040694.1	1110538	11	11q12.3a	"Homo sapiens inner centromere protein antigens 135/155kDa (INCENP), transcript variant 1, mRNA."	3619	102467234	INCENP	FLJ31633; MGC111393	"A structural unit of the synaptonemal complex found between the lateral elements [goid 801] [evidence IEA]; A membrane-bounded organelle of eukaryotic cells in which chromosomes are housed and replicated. In most cells, the nucleus contains all of the cell's chromosomes except the organellar chromosomes, and is the site of RNA synthesis and processing. In some species, or in specialized cell typ…	Interacting selectively with any protein or protein complex (a complex of two or more proteins that may include other nonprotein molecules) [goid 5515] [pmid 9864353] [evidence IPI]; Interacting selectively with any protein or protein complex (a complex of two or more proteins that may include other nonprotein molecules) [goid 5515] [pmid 16239925] [evidence IPI]; Interacting selectively with any…	"A cellular process resulting in the division of the cytoplasm of a cell and its separation into two daughter cells. Cytokinesis usually occurs after growth, replication, and segregation of cellular components [goid 910] [pmid 16239925] [evidence IMP]; The progression of biochemical and morphological phases and events that occur in a cell during successive cell replication or nuclear replication …	+	61676247-61676296	ILMN_2355738	GGGCCCAGCCCCACATGGCCTGCAGACAGTGCTCTGTAAATAGTTGTTTT	3182	A	1110538	NP_001035784.1	NM_001040694.1	NM_001040694.1	RefSeq	NM_001040694.1	Homo sapiens	INCENP	FLJ31633; MGC111393	INCENP	ILMN_168809
0.602873	NM_003447.2	6200014	6	6p22.1b	"Homo sapiens zinc finger protein 165 (ZNF165), mRNA."	7718	30181234	ZNF165	ZSCAN7; LD65	"The living contents of a cell; the matter contained within (but not including) the plasma membrane, usually taken to exclude large vacuoles and masses of secretory or ingested material. In eukaryotes it includes the nucleus and cytoplasm [goid 5622] [evidence IEA]; A membrane-bounded organelle of eukaryotic cells in which chromosomes are housed and replicated. In most cells, the nucleus contains…	The function of binding to a specific DNA sequence in order to modulate transcription. The transcription factor may or may not also interact selectively with a protein or macromolecular complex [goid 3700] [evidence NAS]; Interacting selectively with any protein or protein complex (a complex of two or more proteins that may include other nonprotein molecules) [goid 5515] [pmid 16189514] [evidence…	"The synthesis of either RNA on a template of DNA or DNA on a template of RNA [goid 6350] [evidence IEA]; Any process that modulates the frequency, rate or extent of DNA-dependent transcription [goid 6355] [evidence NAS]"	+	28057153-28057202	ILMN_1806502	CCCTATGAATGCAGTGAGTGTGGAAGAGCCTTCAGTCAGAGCTCAAACCT	2447	S	6200014	NP_003438.1	NM_003447.2	NM_003447.2	RefSeq	NM_003447.2	Homo sapiens	ZNF165	ZSCAN7; LD65	ZNF165	ILMN_177343
0.602885	NM_203401.1	3460707	1	1p36.11b	"Homo sapiens stathmin 1 (STMN1), transcript variant 1, mRNA."	3925	44890051	STMN1	SMN; PR22; PP17; OP18; LAP18; PP19; Lag	"All of the contents of a cell excluding the plasma membrane and nucleus, but including other subcellular structures [goid 5737] [evidence IEA]; The living contents of a cell; the matter contained within (but not including) the plasma membrane, usually taken to exclude large vacuoles and masses of secretory or ingested material. In eukaryotes it includes the nucleus and cytoplasm [goid 5622] [pmi…	"Interacting selectively with any protein or protein complex (a complex of two or more proteins that may include other nonprotein molecules) [goid 5515] [evidence IEA]; Mediates the transfer of a signal from the outside to the inside of a cell by means other than the introduction of the signal molecule itself into the cell [goid 4871] [pmid 8003023] [evidence TAS]; Mediates the transfer of a sign…	"A series of reactions within the cell that occur as a result of a single trigger reaction or compound [goid 7242] [evidence IEA]; A series of reactions within the cell that occur as a result of a single trigger reaction or compound [goid 7242] [evidence IEA]; Generation of a long process of a neuron, that carries efferent (outgoing) action potentials from the cell body towards target cells [goid…	-	26226891-26226940	ILMN_1657796	CCGCACGTTCTCTGCCCCGTTTCTTGCCCCAGTGTGGTTTGCATTGTCTC	1380	A	3460707	NP_981946.1	NM_203401.1	NM_005563.3	RefSeq	NM_203401.1	Homo sapiens	STMN1	PR22; PP17; OP18; SMN; LAP18; PP19; Lag	STMN1	ILMN_12586
0.602897	NM_138285.3	2100452	2	2q32.1a	"Homo sapiens nucleoporin 35kDa (NUP35), mRNA."	129401	56788372	NUP35	MP44; NP44	"A membrane-bounded organelle of eukaryotic cells in which chromosomes are housed and replicated. In most cells, the nucleus contains all of the cell's chromosomes except the organellar chromosomes, and is the site of RNA synthesis and processing. In some species, or in specialized cell types, RNA metabolism or DNA replication may be absent [goid 5634] [evidence IEA]; The double lipid bilayer enc…		"The directed movement of proteins into, out of, within or between cells [goid 15031] [evidence IEA]; The directed movement of mRNA, messenger ribonucleic acid, into, out of, within or between cells [goid 51028] [evidence IEA]; The directed movement of proteins in a cell, from one side of a membrane to another [goid 65002] [evidence IEA]"	+	183724496-183724545	ILMN_1815723	GTCCAGCAAGTATCGGTCAGCCACGAAAGACGACATTATCTCCTGCCCAG	516	I	2100452	NP_612142.2	NM_138285.3	NM_138285.3	RefSeq	NM_138285.3	Homo sapiens	NUP35	MP44; NP44	NUP35	ILMN_17545
0.603737	NM_002354.1	4070575	2	2p21a	"Homo sapiens tumor-associated calcium signal transducer 1 (TACSTD1), mRNA."	4072	4505058	TACSTD1	TROP1; MK-1; M4S1; CD326; Ep-CAM; EGP40; KSA; hEGP-2; CO17-1A; MIC18; EGP; GA733-2	"The membrane surrounding a cell that separates the cell from its external environment. It consists of a phospholipid bilayer and associated proteins [goid 5886] [pmid 1729376] [evidence TAS]; Penetrating at least one phospholipid bilayer of a membrane. May also refer to the state of being buried in the bilayer with no exposure outside the bilayer. When used to describe a protein, indicates that …			+	47460550-47460599	ILMN_2160210	GCTGGTGTTATTGCTGTTATTGTGGTTGTGGTGATAGCAGTTGTTGCTGG	974	S	4070575	NP_002345.1	NM_002354.1	NM_002354.1	RefSeq	NM_002354.1	Homo sapiens	TACSTD1	EGP40; TROP1; KSA; hEGP-2; MK-1; CO17-1A; MIC18; M4S1; EGP; GA733-2; CD326; Ep-CAM	TACSTD1	ILMN_4070
0.603754	XM_939887.2	1820093		8q21.13c	"PREDICTED: Homo sapiens heterogeneous nuclear ribonucleoprotein A1 pseudogene 4 (HNRPA1P4), mRNA."	389674	113420447	HNRPA1P4							ILMN_1690586	AAATTTTGGAGGCAGAAGCTCTGGCCCCCATGGTGGTGGAGGCCAGTACT	732	A	1820093	XP_944980.2	XM_939887.2	XM_372050.4	RefSeq	XM_939887.2	Homo sapiens	HNRPA1P4		HNRPA1P4	ILMN_43539
0.604433	NM_002915.3	3890309	13	13q13.2a	"Homo sapiens replication factor C (activator 1) 3, 38kDa (RFC3), transcript variant 1, mRNA."	5983	108773785	RFC3	RFC38; MGC5276	"A membrane-bounded organelle of eukaryotic cells in which chromosomes are housed and replicated. In most cells, the nucleus contains all of the cell's chromosomes except the organellar chromosomes, and is the site of RNA synthesis and processing. In some species, or in specialized cell types, RNA metabolism or DNA replication may be absent [goid 5634] [evidence IEA]; A membrane-bounded organelle…	"Interacting selectively with a nucleotide, any compound consisting of a nucleoside that is esterified with (ortho)phosphate or an oligophosphate at any hydroxyl group on the ribose or deoxyribose moiety [goid 166] [evidence IEA]; Interacting selectively with DNA (deoxyribonucleic acid) [goid 3677] [evidence IEA]; Interacting selectively with ATP, adenosine 5'-triphosphate, a universally importan…	"The process whereby new strands of DNA are synthesized. The template for replication can either be an existing DNA molecule or RNA [goid 6260] [evidence IEA]; Synthesis of DNA that proceeds from the broken 3' single-strand DNA end uses the homologous intact duplex as the template [goid 731] [pmid 9488738] [evidence TAS]; The process by which a DNA strand is synthesized from template DNA during r…	+	33309319-33309368	ILMN_1784860	GCCGTCACCCCAAAAAGTTCCCTCCATATCCCTTTGCAGTCAGTTCATCC	2068	I	3890309	NP_002906.1	NM_002915.3	NM_002915.2	RefSeq	NM_002915.3	Homo sapiens	RFC3	RFC38; MGC5276	RFC3	ILMN_11616
0.606005	NM_033286.2	6270452	15	15q15.1a	"Homo sapiens chromosome 15 open reading frame 23 (C15orf23), mRNA."	90417	110350670	C15ORF23	HSD11; FLJ14502				+	38470992-38471041	ILMN_2141807	GCGGTGAGACCCTGGCATCACGACAAGAATCCACTACTGATCACATGGAC	736	S	6270452	NP_150628.2	NM_033286.2	NM_033286.2	RefSeq	NM_033286.2	Homo sapiens	C15orf23	FLJ14502; MGC141729; MGC141728; TRAF4AF1; HSD11	C15ORF23	ILMN_28790
0.606561	NM_031423.3	2000458	1	1q23.3c	"Homo sapiens NUF2, NDC80 kinetochore complex component, homolog (S. cerevisiae) (NUF2), transcript variant 2, mRNA."	83540	117968352	NUF2	NUF2R	"The region of a chromosome that includes the centromere and associated proteins. In monocentric chromosomes, this region corresponds to a single area of the chromosome, whereas in holocentric chromosomes, it is evenly distributed along the chromosome [goid 775] [pmid 11266451] [evidence NAS]; A multisubunit complex that is located at the centromeric region of a condensed chromosome and provides …	"Elemental activities, such as catalysis or binding, describing the actions of a gene product at the molecular level. A given gene product may exhibit one or more molecular functions [goid 3674] [evidence ND ]; Interacting selectively with any protein or protein complex (a complex of two or more proteins that may include other nonprotein molecules) [goid 5515] [pmid 15961401] [evidence IPI]; Inte…	"The progression of biochemical and morphological phases and events that occur in a cell during successive cell replication or nuclear replication events. Canonically, the cell cycle comprises the replication and segregation of genetic material followed by the division of the cell, but in endocycles or syncytial cells nuclear replication or nuclear division may not be followed by cell division [g…	+	161591771-161591820	ILMN_1658695	CTGCTTTGGAGAAATACCACGACGGTATTGAAAAGGCAGCAGAGGACTCC	1437	A	2000458	NP_113611.2	NM_031423.3	NM_031423.2	RefSeq	NM_031423.3	Homo sapiens	NUF2	NUF2R; CDCA1	NUF2	ILMN_16808
0.606936	NM_017779.3	6200201	1	1p31.2d	"Homo sapiens DEP domain containing 1 (DEPDC1), mRNA."	55635	41282232	DEPDC1	SDP35; FLJ20354; DEP.8				-	68714215-68714264	ILMN_1802819	CACATTAGACTCACCCGAGGAATTTTAAAACAGCCTATATGCCCAGGGCC	2547	S	6200201	NP_060249.2	NM_017779.3	NM_017779.3	RefSeq	NM_017779.3	Homo sapiens	DEPDC1	SDP35; FLJ20354; DEP.8	DEPDC1	ILMN_25582
0.607637	NM_017915.2	990136	12	12q23.2a	"Homo sapiens chromosome 12 open reading frame 48 (C12orf48), mRNA."	55010	90819238	C12ORF48	FLJ20641	"A membrane-bounded organelle of eukaryotic cells in which chromosomes are housed and replicated. In most cells, the nucleus contains all of the cell's chromosomes except the organellar chromosomes, and is the site of RNA synthesis and processing. In some species, or in specialized cell types, RNA metabolism or DNA replication may be absent [goid 5634] [evidence IEA]; All of the contents of a cel…	Interacting selectively with DNA (deoxyribonucleic acid) [goid 3677] [evidence IEA]		+	101115233-101115282	ILMN_1727055	ACACTTTCAGATAAGAGGTGTTTGCTGGGATGGAAGAACTACCTGGCATG	2994	S	990136	NP_060385.2	NM_017915.2	NM_017915.1	RefSeq	NM_017915.2	Homo sapiens	C12orf48	FLJ20641	C12ORF48	ILMN_42497
0.608383	NM_032117.2	3870372	4	4q31.3d	"Homo sapiens meiotic nuclear divisions 1 homolog (S. cerevisiae) (MND1), mRNA."	84057	38455411	MND1	GAJ	"A membrane-bounded organelle of eukaryotic cells in which chromosomes are housed and replicated. In most cells, the nucleus contains all of the cell's chromosomes except the organellar chromosomes, and is the site of RNA synthesis and processing. In some species, or in specialized cell types, RNA metabolism or DNA replication may be absent [goid 5634] [evidence IEA]"	Interacting selectively with DNA (deoxyribonucleic acid) [goid 3677] [evidence IEA]; Interacting selectively with any protein or protein complex (a complex of two or more proteins that may include other nonprotein molecules) [goid 5515] [evidence IEA]	"Any process by which a new genotype is formed by reassortment of genes resulting in gene combinations different from those that were present in the parents. In eukaryotes genetic recombination can occur by chromosome assortment, intrachromosomal recombination, or nonreciprocal interchromosomal recombination. Intrachromosomal recombination occurs by crossing over. In bacteria it may occur by gene…	+	154336175-154336224	ILMN_2148796	CAAAAGCAGGATGATAACCATATCCCCCCAGTGCTCATCAAAGTAGGACA	873	S	3870372	NP_115493.1	NM_032117.2	NM_032117.2	RefSeq	NM_032117.2	Homo sapiens	MND1	GAJ	MND1	ILMN_28552
0.608399	NM_031299.3	6370474	12	12p13.31d	"Homo sapiens cell division cycle associated 3 (CDCA3), mRNA."	83461	34147595	CDCA3	TOME-1; GRCC8; MGC2577	"The part of a cell or its extracellular environment in which a gene product is located. A gene product may be located in one or more parts of a cell and its location may be as specific as a particular macromolecular complex, that is, a stable, persistent association of macromolecules that function together [goid 5575] [evidence ND ]; All of the contents of a cell excluding the plasma membrane an…	"Elemental activities, such as catalysis or binding, describing the actions of a gene product at the molecular level. A given gene product may exhibit one or more molecular functions [goid 3674] [evidence ND ]"	"The chemical reactions and pathways resulting in the breakdown of a protein or peptide by hydrolysis of its peptide bonds, initiated by the covalent attachment of a ubiquitin moiety, or multiple ubiquitin moieties, to the protein [goid 6511] [evidence IEA]; The progression of biochemical and morphological phases and events that occur in a cell during successive cell replication or nuclear replic…	-	6828529-6828578	ILMN_1737728	GGAAGGAGCCATTCTTGGAACTGGACGACTTCTGAAAACTGGAGGACGAG	793	S	6370474	NP_112589.1	NM_031299.3	NM_031299.3	RefSeq	NM_031299.3	Homo sapiens	CDCA3	TOME-1; GRCC8; MGC2577	CDCA3	ILMN_18763
0.608572	NM_199250.1	2650349	19	19q13.33c	"Homo sapiens chromosome 19 open reading frame 48 (C19orf48), mRNA."	84798	40548383	C19ORF48	MGC13170				-	55993333-55993382	ILMN_2383484	CCACACACCCAGGAGAAGGTGGATAAGTGGGCTACCAAGGGCTTCCTGCA	894	A	2650349	NP_954858.1	NM_199250.1	NM_199250.1	RefSeq	NM_199250.1	Homo sapiens	C19orf48	MGC13170	C19ORF48	ILMN_17977
0.608955	NM_031966.2	4590040	5	5q13.2a	"Homo sapiens cyclin B1 (CCNB1), mRNA."	891	34304372	CCNB1	CCNB	"The part of a cell or its extracellular environment in which a gene product is located. A gene product may be located in one or more parts of a cell and its location may be as specific as a particular macromolecular complex, that is, a stable, persistent association of macromolecules that function together [goid 5575] [evidence ND ]; A membrane-bounded organelle of eukaryotic cells in which chro…	Interacting selectively with any protein or protein complex (a complex of two or more proteins that may include other nonprotein molecules) [goid 5515] [pmid 9001210] [evidence IPI]; Interacting selectively with any protein or protein complex (a complex of two or more proteins that may include other nonprotein molecules) [goid 5515] [pmid 10373560] [evidence IPI]; Interacting selectively with any…	"Progression from G2 phase to M phase of the mitotic cell cycle [goid 86] [evidence NAS]; The progression of biochemical and morphological phases and events that occur in a cell during successive cell replication or nuclear replication events. Canonically, the cell cycle comprises the replication and segregation of genetic material followed by the division of the cell, but in endocycles or syncyt…	+	68473790-68473839	ILMN_1712803	ACTTCCATAGGACATACTGCATGTAAGCCAAGTCATGGAGAATCTGCTGC	1811	S	4590040	NP_114172.1	NM_031966.2	NM_031966.2	RefSeq	NM_031966.2	Homo sapiens	CCNB1	CCNB	CCNB1	ILMN_177161
0.609325	NM_014791.2	160097	9	9p13.2b	"Homo sapiens maternal embryonic leucine zipper kinase (MELK), mRNA."	9833	41281490	MELK	KIAA0175; HPK38	"All of the contents of a cell excluding the plasma membrane and nucleus, but including other subcellular structures [goid 5737] [evidence IEA]"	"Interacting selectively with a nucleotide, any compound consisting of a nucleoside that is esterified with (ortho)phosphate or an oligophosphate at any hydroxyl group on the ribose or deoxyribose moiety [goid 166] [evidence IEA]; Catalysis of the reaction: ATP + a protein serine/threonine = ADP + protein serine/threonine phosphate [goid 4674] [evidence IEA]; Interacting selectively with any prot…	The process of introducing a phosphate group on to a protein [goid 6468] [evidence IEA]	+	36641807-36641856	ILMN_2212909	TGATGGATTCTTCCATCCTGCCGGATGAGTGTGGGTGTGATACAGCCTAC	2096	S	160097	NP_055606.1	NM_014791.2	NM_014791.2	RefSeq	NM_014791.2	Homo sapiens	MELK	KIAA0175; HPK38	MELK	ILMN_161976
0.609368	NM_001005413.1	3120307	10	10q21.1d	"Homo sapiens ZW10 interactor (ZWINT), transcript variant 3, mRNA."	11130	53729319	ZWINT*	HZwint-1; MGC117174; KNTC2AP	"A multisubunit complex that is located at the centromeric region of a condensed chromosome and provides an attachment point for the spindle microtubules [goid 777] [evidence IEA]; A membrane-bounded organelle of eukaryotic cells in which chromosomes are housed and replicated. In most cells, the nucleus contains all of the cell's chromosomes except the organellar chromosomes, and is the site of R…	"Interacting selectively with a protein N-terminus, the end of any peptide chain at which the 2-amino (or 2-imino) function of a constituent amino acid is not attached in peptide linkage to another amino-acid residue [goid 47485] [pmid 15485811] [evidence IPI]"	"The cell cycle process whereby replicated homologous chromosomes are organized and then physically separated and apportioned to two sets during the mitotic cell cycle. Each replicated chromosome, composed of two sister chromatids, aligns at the cell equator, paired with its homologous partner. One homolog of each morphologic type goes into each of the resulting chromosome sets [goid 70] [pmid 15…	-	58117715-58117764	ILMN_2362545	TACTCAGAAGCCAATAACATGACAGGAGCTGGGACTGGTTTGAACACAGG	953	A	3120307	NP_001005413.1	NM_001005413.1	NM_001005413.1	RefSeq	NM_001005413.1	Homo sapiens	ZWINT	HZwint-1; MGC117174; KNTC2AP	ZWINT	ILMN_23487
0.610598	NM_005441.2	4610731	21	21q22.12b-q22.13a	"Homo sapiens chromatin assembly factor 1, subunit B (p60) (CHAF1B), mRNA."	8208	45827788	CHAF1B	CAF1P60; MPP7; MPHOSPH7; CAF-IP60; CAF1A; CAF1; CAF-1	"A membrane-bounded organelle of eukaryotic cells in which chromosomes are housed and replicated. In most cells, the nucleus contains all of the cell's chromosomes except the organellar chromosomes, and is the site of RNA synthesis and processing. In some species, or in specialized cell types, RNA metabolism or DNA replication may be absent [goid 5634] [pmid 9614144] [evidence NAS]; That part of …	"Interacting selectively with chromatin, the network of fibers of DNA and protein that make up the chromosomes of the eukaryotic nucleus during interphase [goid 3682] [pmid 7600578] [evidence TAS]; Interacting selectively with a histone, any of a group of water-soluble proteins found in association with the DNA of plant and animal chromosomes. They are involved in the condensation and coiling of …	"The process whereby new strands of DNA are synthesized. The template for replication can either be an existing DNA molecule or RNA [goid 6260] [evidence IEA]; The process of restoring DNA after damage. Genomes are subject to damage by chemical and physical agents in the environment (e.g. UV and ionizing radiations, chemical mutagens, fungal and bacterial toxins, etc.) and by free radicals or alk…	+	36710816-36710865	ILMN_1674231	CAGTGAGTCCTCCCTGGCATCCTCGTGAAAGTGCACACACTTCATGGAGG	2100	S	4610731	NP_005432.1	NM_005441.2	NM_005441.2	RefSeq	NM_005441.2	Homo sapiens	CHAF1B	CAF1P60; MPP7; MPHOSPH7; CAF-IP60; CAF1A; CAF1; CAF-1	CHAF1B	ILMN_165317
0.611395	XR_039632.1	5290546		12q21.2b	"PREDICTED: Homo sapiens misc_RNA (LOC727803), miscRNA."	727803	169204902	LOC727803							ILMN_3212373	ATCATGCGGATGATGGAGCTGAAGCCCAAGCAGGTAGTGACCGTGCCTGG	297	A	5290546		XR_039632.1	XR_039632.1	RefSeq	XR_039632.1	Homo sapiens	LOC727803		LOC727803	ILMN_346420
0.612225	NM_016195.2	5900433	10	10q23.31c	"Homo sapiens kinesin family member 20B (KIF20B), mRNA."	9585	46049113	KIF20B	DKFZp434P0810; DKFZp434B0435; MPP-1; KRMP1; MPP1				+	91492662-91492711	ILMN_1712452	CCAGCCACTGGTAACCATTCTTCTACTCTGTATGCCCATGAGGTCAATTG	6213	S	5900433	NP_057279.2	NM_016195.2	NM_016195.2	RefSeq	NM_016195.2	Homo sapiens	KIF20B	DKFZp434P0810; DKFZp434B0435; MPP-1; KRMP1; MPP1	KIF20B	ILMN_12022
0.6123	NM_018842.3	5700343	7	7q21.3d	"Homo sapiens BAI1-associated protein 2-like 1 (BAIAP2L1), mRNA."	55971	34222363	BAIAP2L1	IRTKS	"The part of a cell or its extracellular environment in which a gene product is located. A gene product may be located in one or more parts of a cell and its location may be as specific as a particular macromolecular complex, that is, a stable, persistent association of macromolecules that function together [goid 5575] [evidence ND ]"	"Elemental activities, such as catalysis or binding, describing the actions of a gene product at the molecular level. A given gene product may exhibit one or more molecular functions [goid 3674] [evidence ND ]"	"The cascade of processes by which a signal interacts with a receptor, causing a change in the level or activity of a second messenger or other downstream target, and ultimately effecting a change in the functioning of the cell [goid 7165] [evidence IEA]; The process whose specific outcome is the progression of nervous tissue over time, from its formation to its mature state [goid 7399] [evidence…	-	97760653-97760702	ILMN_1703593	TCTGCCACGTGCTGACGGTCGGGAAGCTTCAGTGGAGAGGCCTAACTCTA	1818	S	5700343	NP_061330.2	NM_018842.3	NM_018842.3	RefSeq	NM_018842.3	Homo sapiens	BAIAP2L1	IRTKS	BAIAP2L1	ILMN_16050
0.613071	NM_030919.2	150543	20	20q11.23c	"Homo sapiens family with sequence similarity 83, member D (FAM83D), mRNA."	81610	116235447	FAM83D	dJ616B8.3; FAM83D				+	37014583-37014632	ILMN_1781943	CCGTGTTCAGACTCCTGGTTTCTTCCAGGCTTACAGTGGACATCATCAGC	1895	S	150543	NP_112181.2	NM_030919.2	NM_030919.1	RefSeq	NM_030919.2	Homo sapiens	FAM83D	C20orf129; FLJ38341; dJ616B8.3	FAM83D	ILMN_16948
0.613235	NM_018685.2	6450669	7	7p14.2a	"Homo sapiens anillin, actin binding protein (ANLN), mRNA."	54443	31657093	ANLN	DKFZp779A055; Scraps; scra; ANILLIN	"A membrane-bounded organelle of eukaryotic cells in which chromosomes are housed and replicated. In most cells, the nucleus contains all of the cell's chromosomes except the organellar chromosomes, and is the site of RNA synthesis and processing. In some species, or in specialized cell types, RNA metabolism or DNA replication may be absent [goid 5634] [evidence IEA]; All of the contents of a cel…	"Interacting selectively with monomeric or multimeric forms of actin, including actin filaments [goid 3779] [pmid 10931866] [evidence IDA]"	"A cellular process resulting in the division of the cytoplasm of a cell and its separation into two daughter cells. Cytokinesis usually occurs after growth, replication, and segregation of cellular components [goid 910] [pmid 10931866] [evidence IDA]; The aggregation, arrangement and bonding together of septins and associated proteins to form an organized structure resembling a ring at the cell …	+	36446055-36446104	ILMN_1739645	TCAGAAAAGTGATGTGGACATAGGAGGCAATGTGTGAGACTTGGGGGTTC	4131	S	6450669	NP_061155.2	NM_018685.2	NM_018685.2	RefSeq	NM_018685.2	Homo sapiens	ANLN	DKFZp779A055; Scraps; scra; ANILLIN	ANLN	ILMN_20921
0.613348	NM_005983.2	4730674	5	5p13.2c	"Homo sapiens S-phase kinase-associated protein 2 (p45) (SKP2), transcript variant 1, mRNA."	6502	16306594	SKP2	MGC1366; FBXL1; FBL1; FLB1		Interacting selectively with any protein or protein complex (a complex of two or more proteins that may include other nonprotein molecules) [goid 5515] [pmid 11931757] [evidence IPI]; Interacting selectively with any protein or protein complex (a complex of two or more proteins that may include other nonprotein molecules) [goid 5515] [pmid 17157259] [evidence IPI]; Interacting selectively with an…	"Progression from G1 phase to S phase of the mitotic cell cycle [goid 82] [pmid 7553852] [evidence TAS]; The chemical reactions and pathways resulting in the breakdown of a protein or peptide by hydrolysis of its peptide bonds, initiated by the covalent attachment of a ubiquitin moiety, or multiple ubiquitin moieties, to the protein [goid 6511] [evidence IEA]; The multiplication or reproduction o…	+	36171768-36171817	ILMN_1791002	GGCTGTTGCGCATGTGTCAGAGACCATCACCCAGCTGAATCTTAGCGGCT	1010	A	4730674	NP_005974.2	NM_005983.2	NM_032637.2	RefSeq	NM_005983.2	Homo sapiens	SKP2	MGC1366; FBXL1; FBL1; FLB1	SKP2	ILMN_27439
0.613374	NM_203433.1	1010168	21	21q22.2a	"Homo sapiens proteasome (prosome, macropain) assembly chaperone 1 (PSMG1), transcript variant 2, mRNA."	8624	44680113	PSMG1	C21LRP; PAC1; DSCR2; LRPC21	"All of the contents of a cell excluding the plasma membrane and nucleus, but including other subcellular structures [goid 5737] [pmid 15670775] [evidence IDA]; The irregular network of unit membranes, visible only by electron microscopy, that occurs in the cytoplasm of many eukaryotic cells. The membranes form a complex meshwork of tubular channels, which are often expanded into slitlike cavitie…	Interacting selectively with any protein or protein complex (a complex of two or more proteins that may include other nonprotein molecules) [goid 5515] [pmid 16251969] [evidence IPI]	"The aggregation, arrangement and bonding together of a mature, active proteasome complex [goid 43248] [pmid 16251969] [evidence IDA]"	-	40550379-40550428	ILMN_1659285	GCGTGTTGTCCATTGCTAGAACAACCGAATATAGTACACGACCTTCCTGC	667	A	1010168	NP_982257.1	NM_203433.1	NM_203433.1	RefSeq	NM_203433.1	Homo sapiens	PSMG1	C21LRP; PAC1; DSCR2; LRPC21	PSMG1	ILMN_13497
0.613501	NM_032900.4	6110332	10	10q24.1b	"Homo sapiens Rho GTPase activating protein 19 (ARHGAP19), mRNA."	84986	67906813	ARHGAP19	MGC138804; MGC138805; MGC14258; DKFZp313K217	"The living contents of a cell; the matter contained within (but not including) the plasma membrane, usually taken to exclude large vacuoles and masses of secretory or ingested material. In eukaryotes it includes the nucleus and cytoplasm [goid 5622] [evidence IEA]; A membrane-bounded organelle of eukaryotic cells in which chromosomes are housed and replicated. In most cells, the nucleus contains…	"Increases the activity of a GTPase, an enzyme that catalyzes the hydrolysis of GTP [goid 5096] [evidence IEA]"	"The cascade of processes by which a signal interacts with a receptor, causing a change in the level or activity of a second messenger or other downstream target, and ultimately effecting a change in the functioning of the cell [goid 7165] [evidence IEA]"	-	98983559-98983608	ILMN_1688953	GGCCAGCGAGGAGGTGTGGGACATAATAGCCTGAGTGCTTGGGTTACCAT	5097	S	6110332	NP_116289.4	NM_032900.4	NM_032900.4	RefSeq	NM_032900.4	Homo sapiens	ARHGAP19	MGC138804; MGC138805; MGC14258; DKFZp313K217	ARHGAP19	ILMN_22028
0.613596	NM_201555.1	990288	2	2q12.2a	"Homo sapiens four and a half LIM domains 2 (FHL2), transcript variant 2, mRNA."	2274	42403574	FHL2	SLIM3; AAG11; DRAL	"A membrane-bounded organelle of eukaryotic cells in which chromosomes are housed and replicated. In most cells, the nucleus contains all of the cell's chromosomes except the organellar chromosomes, and is the site of RNA synthesis and processing. In some species, or in specialized cell types, RNA metabolism or DNA replication may be absent [goid 5634] [pmid 9150430] [evidence TAS]; All of the co…	The function of a transcription cofactor that activates transcription from a RNA polymerase II promoter; does not bind DNA itself [goid 3713] [pmid 15572661] [evidence NAS]; Interacting selectively with zinc (Zn) ions [goid 8270] [evidence IEA]; Interacting selectively with an identical protein or proteins [goid 42802] [pmid 18255255] [evidence IPI]; Interacting selectively with any metal ion [go…	"The synthesis of either RNA on a template of DNA or DNA on a template of RNA [goid 6350] [evidence IEA]; Any process that modulates the frequency, rate or extent of transcription from an RNA polymerase II promoter [goid 6357] [evidence IEA]; Any series of molecular signals generated as a consequence of an androgen binding to its receptor [goid 30521] [pmid 15572661] [evidence NAS]; Any process t…	-	105977307-105977356	ILMN_2355831	CAGCTCTGTAACCTCCCGTTGCGTCAAGTCTAAACCAAGATTATGTGACT	1802	A	990288	NP_963849.1	NM_201555.1	NM_201555.1	RefSeq	NM_201555.1	Homo sapiens	FHL2	SLIM3; AAG11; DRAL	FHL2	ILMN_21541
0.613721	NR_002920.1	3800278	11	11q21a	"Homo sapiens small nucleolar RNA, H/ACA box 8 (SNORA8), small nucleolar RNA."	654320	86604718	SNORA8	ACA8				-	93465611-93465660	ILMN_3238707	CTGCATGGTATCTGCACTCAGCAGTTTACACCTGCTAGGGTGTTCAAAGG	5	S	3800278		NR_002920.1	NR_002920.1	RefSeq	NR_002920.1	Homo sapiens	SNORA8	ACA8	SNORA8	ILMN_32814
0.613793	NM_019013.1	5870193	17	17p13.2a	"Homo sapiens family with sequence similarity 64, member A (FAM64A), mRNA."	54478	9506604	FAM64A	FLJ10491; FLJ10156				+	6294796-6294845	ILMN_1728972	AGTCACTCACCCACTGTGTTTCTGGTGCCAAGGCTCTTGAGGGCCCCACT	1171	S	5870193	NP_061886.1	NM_019013.1	NM_019013.1	RefSeq	NM_019013.1	Homo sapiens	FAM64A	FLJ10491; FLJ10156	FAM64A	ILMN_18676
0.614511	NM_173362.2	6100278	5	5q15c	"Homo sapiens Rieske (Fe-S) domain containing (RFESD), mRNA."	317671	40255164	RFESD			"Interacting selectively with iron (Fe) ions [goid 5506] [evidence IEA]; Any molecular entity that serves as an electron acceptor and electron donor in an electron transport system [goid 9055] [evidence IEA]; Catalysis of an oxidation-reduction (redox) reaction, a reversible chemical reaction in which the oxidation state of an atom or atoms within a molecule is altered. One substrate acts as a hy…	The process of removal or addition of one or more electrons with or without the concomitant removal or addition of a proton or protons [goid 55114] [evidence IEA]	+	95015814-95015827:95017506-95017541	ILMN_2100458	GGGAGATATAGAGGATTTTGATGGACGACCGTGTATAGTTTGCCCCTGGC	1588	S	6100278	NP_775498.1	NM_173362.2	NM_173362.2	RefSeq	NM_173362.2	Homo sapiens	RFESD		RFESD	ILMN_174243
0.614932	NM_015190.3	50114	10	10q22.2a	"Homo sapiens DnaJ (Hsp40) homolog, subfamily C, member 9 (DNAJC9), mRNA."	23234	33667083	DNAJC9	JDD1; KIAA0974; SB73; HDJC9		"Interacting selectvely with a heat shock protein, any protein synthesized or activated in response to heat shock [goid 31072] [evidence IEA]"		-	75002746-75002795	ILMN_1799516	GGCTCTCTACCCAGCTAGAACACCTTCCAGACACTTGCTGGACAGCTATC	1223	S	50114	NP_056005.1	NM_015190.3	NM_015190.3	RefSeq	NM_015190.3	Homo sapiens	DNAJC9	JDD1; KIAA0974; SB73; HDJC9	DNAJC9	ILMN_28456
0.614962	NM_024094.1	3890372	8	8q24.12c	"Homo sapiens defective in sister chromatid cohesion 1 homolog (S. cerevisiae) (DSCC1), mRNA."	79075	13129095	DSCC1	hDCC1; MGC5528; DCC1	"A membrane-bounded organelle of eukaryotic cells in which chromosomes are housed and replicated. In most cells, the nucleus contains all of the cell's chromosomes except the organellar chromosomes, and is the site of RNA synthesis and processing. In some species, or in specialized cell types, RNA metabolism or DNA replication may be absent [goid 5634] [evidence IEA]"	Interacting selectively with DNA (deoxyribonucleic acid) [goid 3677] [evidence IEA]	"The process whereby new strands of DNA are synthesized. The template for replication can either be an existing DNA molecule or RNA [goid 6260] [evidence IEA]; The progression of biochemical and morphological phases and events that occur in a cell during successive cell replication or nuclear replication events. Canonically, the cell cycle comprises the replication and segregation of genetic mate…	-	120915532-120915581	ILMN_1776577	CTCATCACCAGGACAGTTGGAGGGGGTAGGCCGAGGTTAAATGGTCCACG	2028	S	3890372	NP_076999.1	NM_024094.1	NM_024094.1	RefSeq	NM_024094.1	Homo sapiens	DSCC1	hDCC1; MGC5528; DCC1	DSCC1	ILMN_3628
0.615095	NM_020675.3	1070411	2	2q24.3f	"Homo sapiens SPC25, NDC80 kinetochore complex component, homolog (S. cerevisiae) (SPC25), mRNA."	57405	23510353	SPC25	SPBC25; MGC22228; AD024	"A multisubunit complex that is located at the centromeric region of a condensed chromosome and provides an attachment point for the spindle microtubules [goid 777] [evidence IEA]; A membrane-bounded organelle of eukaryotic cells in which chromosomes are housed and replicated. In most cells, the nucleus contains all of the cell's chromosomes except the organellar chromosomes, and is the site of R…	Interacting selectively with any protein or protein complex (a complex of two or more proteins that may include other nonprotein molecules) [goid 5515] [pmid 15961401] [evidence IPI]; Interacting selectively with any protein or protein complex (a complex of two or more proteins that may include other nonprotein molecules) [goid 5515] [pmid 14699129] [evidence IPI]	"The progression of biochemical and morphological phases and events that occur in a cell during successive cell replication or nuclear replication events. Canonically, the cell cycle comprises the replication and segregation of genetic material followed by the division of the cell, but in endocycles or syncytial cells nuclear replication or nuclear division may not be followed by cell division [g…	-	169728031-169728065:169730095-169730109	ILMN_1814281	GCAAGGGACTATGAAGTGTCAGATAGTGCCCCTCATCTTGAGGGCCTAGC	666	S	1070411	NP_065726.1	NM_020675.3	NM_020675.3	RefSeq	NM_020675.3	Homo sapiens	SPC25	SPBC25; MGC22228; AD024	SPC25	ILMN_915
0.616753	NM_152624.4	6960349	5	5q22.2b	"Homo sapiens DCP2 decapping enzyme homolog (S. cerevisiae) (DCP2), mRNA."	167227	58331235	DCP2	NUDT20; FLJ33245	"A membrane-bounded organelle of eukaryotic cells in which chromosomes are housed and replicated. In most cells, the nucleus contains all of the cell's chromosomes except the organellar chromosomes, and is the site of RNA synthesis and processing. In some species, or in specialized cell types, RNA metabolism or DNA replication may be absent [goid 5634] [evidence IEA]; All of the contents of a cel…	"Interacting selectively with an RNA molecule or a portion thereof [goid 3723] [evidence IEA]; Interacting selectively with any protein or protein complex (a complex of two or more proteins that may include other nonprotein molecules) [goid 5515] [pmid 16364915] [evidence IPI]; Interacting selectively with any protein or protein complex (a complex of two or more proteins that may include other no…	"The nonsense-mediated decay pathway for nuclear-transcribed mRNAs degrades mRNAs in which an amino-acid codon has changed to a nonsense codon; this prevents the translation of such mRNAs into truncated, and potentially harmful, proteins [goid 184] [evidence IEA]"	+	112356140-112356189	ILMN_1669905	CTTCCAAAGACCCACTAGAATGTCAGCTGTACTCTGTACTCTCCACTGAG	8671	S	6960349	NP_689837.2	NM_152624.4	NM_152624.4	RefSeq	NM_152624.4	Homo sapiens	DCP2	NUDT20; FLJ33245	DCP2	ILMN_179808
0.617053	XM_028217.4	5290678	4	4q23c	"PREDICTED: Homo sapiens hypothetical LOC90024 (FLJ20021), mRNA."	90024	88976625	FLJ20021					+	102488971-102489020	ILMN_1754114	TCCCCGACCAACTGCAGCACCCAAGGACTGGCAACGTGGTTGGAGCTTTT	829	A	5290678	XP_028217.3	XM_028217.4	XM_028217.4	RefSeq	XM_028217.4	Homo sapiens	FLJ20021		FLJ20021	ILMN_31242
0.617213	NM_005914.2	6020170	8	8q11.21b	"Homo sapiens minichromosome maintenance complex component 4 (MCM4), transcript variant 1, mRNA."	4173	33469918	MCM4	P1-CDC21; CDC54; MGC33310; CDC21; hCdc21	"A membrane-bounded organelle of eukaryotic cells in which chromosomes are housed and replicated. In most cells, the nucleus contains all of the cell's chromosomes except the organellar chromosomes, and is the site of RNA synthesis and processing. In some species, or in specialized cell types, RNA metabolism or DNA replication may be absent [goid 5634] [pmid 8265339] [evidence NAS]; That part of …	"Catalysis of the reaction: NTP + H2O = NDP + phosphate to drive the unwinding of a DNA helix [goid 3678] [evidence IEA]; Interacting selectively with single-stranded DNA [goid 3697] [evidence IEA]; Interacting selectively with any protein or protein complex (a complex of two or more proteins that may include other nonprotein molecules) [goid 5515] [evidence IEA]; Catalysis of the hydrolysis of v…	"The process by which interchain hydrogen bonds between two strands of DNA are broken or 'melted', generating unpaired template strands for DNA replication [goid 6268] [evidence IEA]; The process whereby new strands of DNA are synthesized. The template for replication can either be an existing DNA molecule or RNA [goid 6260] [pmid 9465298] [evidence NAS]; The process whereby new strands of DNA ar…	+	48889351-48889400	ILMN_1737205	AAGGAAGGCTCCCTGCATGTCCTGCTTGCTGCACGCCACATGGGTGTGGT	2816	A	6020170	NP_005905.2	NM_005914.2	NM_005914.2	RefSeq	NM_005914.2	Homo sapiens	MCM4	P1-CDC21; CDC54; MGC33310; CDC21; hCdc21	MCM4	ILMN_3407
0.61722	NM_001237.2	2650608	4	4q27c	"Homo sapiens cyclin A2 (CCNA2), mRNA."	890	16950653	CCNA2	CCNA; CCN1	"The pronucleus originating from the ovum that is being fertilized [goid 1939] [evidence IEA]; The pronucleus originating from the spermatozoa that was involved in fertilization [goid 1940] [evidence IEA]; A membrane-bounded organelle of eukaryotic cells in which chromosomes are housed and replicated. In most cells, the nucleus contains all of the cell's chromosomes except the organellar chromoso…	Interacting selectively with any protein or protein complex (a complex of two or more proteins that may include other nonprotein molecules) [goid 5515] [pmid 17254966] [evidence IPI]; Interacting selectively with any protein or protein complex (a complex of two or more proteins that may include other nonprotein molecules) [goid 5515] [pmid 15890360] [evidence IPI]	"The progression of biochemical and morphological phases and events that occur in a cell during successive cell replication or nuclear replication events. Canonically, the cell cycle comprises the replication and segregation of genetic material followed by the division of the cell, but in endocycles or syncytial cells nuclear replication or nuclear division may not be followed by cell division [g…	-	122958685-122958734	ILMN_1786125	CCTTGTCTCATGGACCTTCACCAGACCTACCTCAAAGCACCACAGCATGC	1273	S	2650608	NP_001228.1	NM_001237.2	NM_001237.2	RefSeq	NM_001237.2	Homo sapiens	CCNA2	CCNA; CCN1	CCNA2	ILMN_16427
0.61745	NM_000156.4	5290593	19	19p13.3i	"Homo sapiens guanidinoacetate N-methyltransferase (GAMT), transcript variant 1, mRNA."	2593	20336210	GAMT	TP53I2; PIG2	That part of the cytoplasm that does not contain membranous or particulate subcellular components [goid 5829] [pmid 8651275] [evidence EXP]	"Catalysis of the transfer of a methyl group to an acceptor molecule [goid 8168] [evidence IEA]; Catalysis of the transfer of a group, e.g. a methyl group, glycosyl group, acyl group, phosphorus-containing, or other groups, from one compound (generally regarded as the donor) to another compound (generally regarded as the acceptor). Transferase is the systematic name for any enzyme of EC class 2 […	"The chemical reactions and pathways resulting in the formation of creatine (N-(aminoiminomethyl)-N-methylglycine), a compound synthesized from the amino acids arginine, glycine, and methionine that occurs in muscle [goid 6601] [pmid 9325156] [evidence TAS]; A process whereby force is generated within muscle tissue, resulting in a change in muscle geometry. Force generation involves a chemo-mecha…	-	1397140-1397189	ILMN_1756469	CACCAGCAGCTTTCCCAGCTTCTCTGTGAGGGTCACTGCTGCCCACTGCA	956	I	5290593	NP_000147.1	NM_000156.4	NM_000156.4	RefSeq	NM_000156.4	Homo sapiens	GAMT	TP53I2; PIG2	GAMT	ILMN_20028
0.617734	NM_001107.3	5910148	14	14q24.3b	"Homo sapiens acylphosphatase 1, erythrocyte (common) type (ACYP1), transcript variant 1, mRNA."	97	45243543	ACYP1	ACYPE		"Catalysis of the reaction: an acyl phosphate + H2O = a carboxylate + phosphate [goid 3998] [evidence IEA]; Catalysis of the reaction: an acyl phosphate + H2O = a carboxylate + phosphate [goid 3998] [pmid 7796909] [evidence TAS]; Catalysis of the hydrolysis of various bonds, e.g. C-O, C-N, C-C, phosphoric anhydride bonds, etc. Hydrolase is the systematic name for any enzyme of EC class 3 [goid 16…	"The chemical reactions and pathways involving the phosphate group, the anion or salt of any phosphoric acid [goid 6796] [pmid 3026468] [evidence TAS]"	-	75520237-75520286	ILMN_1694233	GGTCCCATCTCCAAGGTGCGTCATATGCAGGAATGGCTTGAAACAAGAGG	248	A	5910148	NP_001098.1	NM_001107.3	NM_203488.1	RefSeq	NM_001107.3	Homo sapiens	ACYP1	ACYPE	ACYP1	ILMN_22509
0.618355	NM_138484.2	4610348	3	3p24.3b	"Homo sapiens shugoshin-like 1 (S. pombe) (SGOL1), transcript variant C2, mRNA."	151648	142359926	SGOL1	NY-BR-85; Sgo1	"The region of a chromosome that includes the centromere and associated proteins. In monocentric chromosomes, this region corresponds to a single area of the chromosome, whereas in holocentric chromosomes, it is evenly distributed along the chromosome [goid 775] [evidence IEA]; A membrane-bounded organelle of eukaryotic cells in which chromosomes are housed and replicated. In most cells, the nucl…	Interacting selectively with any protein or protein complex (a complex of two or more proteins that may include other nonprotein molecules) [goid 5515] [pmid 16541025] [evidence IPI]	"The progression of biochemical and morphological phases and events that occur in a cell during successive cell replication or nuclear replication events. Canonically, the cell cycle comprises the replication and segregation of genetic material followed by the division of the cell, but in endocycles or syncytial cells nuclear replication or nuclear division may not be followed by cell division [g…	-	20212678-20212724:20218093-20218095	ILMN_1730825	GAAGCTACACCACCTGAAACTCAGCAGTCACCTCATCTTAGCCTGAAGGA	612	A	4610348	NP_612493.1	NM_138484.2	NM_001012413.1	RefSeq	NM_138484.2	Homo sapiens	SGOL1	NY-BR-85; Sgo1	SGOL1	ILMN_14008
0.618637	NM_006027.3	1770646	1	1q43e	"Homo sapiens exonuclease 1 (EXO1), transcript variant 1, mRNA."	9156	39995070	EXO1	HEX1; hExoI	"A membrane-bounded organelle of eukaryotic cells in which chromosomes are housed and replicated. In most cells, the nucleus contains all of the cell's chromosomes except the organellar chromosomes, and is the site of RNA synthesis and processing. In some species, or in specialized cell types, RNA metabolism or DNA replication may be absent [goid 5634] [pmid 11429708] [evidence IDA]; A membrane-b…	"Interacting selectively with DNA (deoxyribonucleic acid) [goid 3677] [pmid 11842105] [evidence IDA]; Catalysis of the hydrolysis of ester linkages within nucleic acids by creating internal breaks [goid 4519] [evidence IEA]; Catalysis of the endonucleolytic cleavage of RNA in RNA-DNA hybrids to 5'-phosphomonoesters [goid 4523] [pmid 10364235] [evidence TAS]; Interacting selectively with any prote…	"A system for the correction of errors introduced during DNA replication when an incorrect base, which cannot form hydrogen bonds with the corresponding base in the parent strand, is incorporated into the daughter strand. The mismatch repair system promotes genomic fidelity by repairing base-base mismatches, insertion-deletion loops and heterologies generated during DNA replication and recombinat…	+	240119417-240119466	ILMN_1673721	GAAACCCCTGTCCCCAGTCAGAGATAACATCCAACTAACTCCAGAAGCGG	2868	A	1770646	NP_006018.3	NM_006027.3	NM_003686.3	RefSeq	NM_006027.3	Homo sapiens	EXO1	HEX1; hExoI	EXO1	ILMN_25997
0.618716	NM_003503.2	4900044	1	1p22.2a	"Homo sapiens cell division cycle 7 homolog (S. cerevisiae) (CDC7), mRNA."	8317	11038647	CDC7	HsCDC7; MGC126237; CDC7L1; huCDC7; MGC126238; Hsk1; MGC117361	"A membrane-bounded organelle of eukaryotic cells in which chromosomes are housed and replicated. In most cells, the nucleus contains all of the cell's chromosomes except the organellar chromosomes, and is the site of RNA synthesis and processing. In some species, or in specialized cell types, RNA metabolism or DNA replication may be absent [goid 5634] [pmid 9250678] [evidence IDA]; That part of …	"Interacting selectively with a nucleotide, any compound consisting of a nucleoside that is esterified with (ortho)phosphate or an oligophosphate at any hydroxyl group on the ribose or deoxyribose moiety [goid 166] [evidence IEA]; Catalysis of the phosphorylation of an amino acid residue in a protein, usually according to the reaction: a protein + ATP = a phosphoprotein + ADP [goid 4672] [evidenc…	"The process of introducing a phosphate group on to a protein [goid 6468] [evidence IEA]; The process resulting in the physical partitioning and separation of a cell into daughter cells [goid 51301] [evidence IEA]; The process of formation of spermatozoa, including spermatocytogenesis and spermiogenesis [goid 7283] [evidence IEA]; The meiotic divisions undergone by the primary and secondary sperm…	+	91763635-91763684	ILMN_1741801	GACAGCATATCAAACTTCCTATGGGAAAAAGTCTGGTGGGTGGTCAGCTG	2905	S	4900044	NP_003494.1	NM_003503.2	NM_003503.2	RefSeq	NM_003503.2	Homo sapiens	CDC7	HsCDC7; MGC126237; CDC7L1; huCDC7; MGC126238; Hsk1; MGC117361	CDC7	ILMN_20584
0.619118	NR_003142.2	1300608	16	16p13.3e	"Homo sapiens small nucleolar RNA host gene 9 (non-protein coding) (SNHG9), non-coding RNA."	735301	141802492	SNHG9	DKFZp686N06141				+	1955069-1955118	ILMN_3238785	GGAATCCACCCGAAGAGTGGCTATAAACGTCCGCGCCTCCATTGCGCTCT	72	S	1300608		NR_003142.2	NR_003142.2	RefSeq	NR_003142.2	Homo sapiens	SNHG9	DKFZp686N06141	SNHG9	ILMN_181475
0.620387	XR_015310.1	3180619	7	7q36.1a	"PREDICTED: Homo sapiens misc_RNA (LOC643438), miscRNA."	643438	113418837	LOC643438					+	147965225-147965274	ILMN_1660869	ATGCGGCGGCGTGGTGAAATAGATGCGGCGACCGAGGGGGATGTGGAGCT	1	S	3180619		XR_015310.1	XM_926769.1	RefSeq	XR_015310.1	Homo sapiens	LOC643438		LOC643438	ILMN_165861
0.620662	NR_002912.1	1240577	17	17p13.1d	"Homo sapiens small nucleolar RNA, H/ACA box 67 (SNORA67), small nucleolar RNA."	26781	86604701	SNORA67	RNU67; U67				+	7422078-7422127	ILMN_3247018	GGCCTTTGGGGAACTGGGATGCTTATTTCCTCTGCCTTCCTTGGCTGCCC	82	S	1240577		NR_002912.1	NR_002912.1	RefSeq	NR_002912.1	Homo sapiens	SNORA67	RNU67; U67	SNORA67	ILMN_31907
0.62092	NM_002167.2	7570324	1	1p36.12a	"Homo sapiens inhibitor of DNA binding 3, dominant negative helix-loop-helix protein (ID3), mRNA."	3399	32171181	ID3	HEIR-1	"A membrane-bounded organelle of eukaryotic cells in which chromosomes are housed and replicated. In most cells, the nucleus contains all of the cell's chromosomes except the organellar chromosomes, and is the site of RNA synthesis and processing. In some species, or in specialized cell types, RNA metabolism or DNA replication may be absent [goid 5634] [evidence IEA]"	"The function of a transcription cofactor that represses transcription from a RNA polymerase II promoter; does not bind DNA itself [goid 3714] [pmid 8437843] [evidence TAS]; Interacting selectively with a transcription factor, any protein required to initiate or regulate transcription [goid 8134] [evidence IEA]; Interacting selectively with a specific domain of a protein [goid 19904] [evidence IE…	"Any process that stops, prevents or reduces the frequency, rate or extent of transcription from an RNA polymerase II promoter [goid 122] [evidence IEA]; The biological process whose specific outcome is the progression of a multicellular organism over time from an initial condition (e.g. a zygote or a young adult) to a later condition (e.g. a multicellular animal or an aged adult) [goid 7275] [pm…	-	23757369-23757418	ILMN_1732296	CCCCAACTTCGCCCTGCCCACTTGACTTCACCAAATCCCTTCCTGGAGAC	828	S	7570324	NP_002158.2	NM_002167.2	NM_002167.2	RefSeq	NM_002167.2	Homo sapiens	ID3	HEIR-1	ID3	ILMN_6829
0.621756	NM_014264.3	3190470	4	4q28.1e	"Homo sapiens polo-like kinase 4 (Drosophila) (PLK4), mRNA."	10733	121114282	PLK4	SAK; STK18		"Interacting selectively with a nucleotide, any compound consisting of a nucleoside that is esterified with (ortho)phosphate or an oligophosphate at any hydroxyl group on the ribose or deoxyribose moiety [goid 166] [evidence IEA]; Catalysis of the reaction: ATP + a protein serine/threonine = ADP + protein serine/threonine phosphate [goid 4674] [pmid 10607900] [evidence TAS]; Catalysis of the reac…	The process of introducing a phosphate group on to a protein [goid 6468] [pmid 10607900] [evidence TAS]	+	128817992-128818041	ILMN_1789123	GGGTCCCAGTTGGTTGTGCAGGCAGGAGTGTCTTCTATCAGTTATACCTC	2985	S	3190470	NP_055079.3	NM_014264.3	NM_014264.2	RefSeq	NM_014264.3	Homo sapiens	PLK4	SAK; STK18	PLK4	ILMN_167207
0.621805	NM_015426.2	6660446	3	3p21.1e	"Homo sapiens WD repeat domain 51A (WDR51A), mRNA."	25886	31377769	WDR51A	MGC131902; DKFZP434C245				-	52084332-52084381	ILMN_1780667	CACTGGAGCCAGGTGACTTCCTCCTTGCGTGAGTGAGGGCACAGGAATCT	1817	S	6660446	NP_056241.2	NM_015426.2	NM_015426.2	RefSeq	NM_015426.2	Homo sapiens	WDR51A	MGC131902; DKFZP434C245	WDR51A	ILMN_23579
0.621959	NM_002228.3	6510367	1	1p32.1f	"Homo sapiens jun oncogene (JUN), mRNA."	3725	44890066	JUN	AP1; c-Jun	"A chromosome found in the nucleus of a eukaryotic cell [goid 228] [pmid 10918580] [evidence TAS]; A membrane-bounded organelle of eukaryotic cells in which chromosomes are housed and replicated. In most cells, the nucleus contains all of the cell's chromosomes except the organellar chromosomes, and is the site of RNA synthesis and processing. In some species, or in specialized cell types, RNA me…	"The function of binding to a specific DNA sequence in order to modulate transcription. The transcription factor may or may not also interact selectively with a protein or macromolecular complex [goid 3700] [pmid 2825349] [evidence TAS]; The function of binding to a specific DNA sequence in order to modulate transcription. The transcription factor may or may not also interact selectively with a p…	"Any process that modulates the frequency, rate or extent of DNA-dependent transcription [goid 6355] [evidence IEA]; Any process that is carried out at the cellular level, but not necessarily restricted to a single cell. For example, cell communication occurs among more than one cell, but occurs at the cellular level [goid 9987] [evidence IEA]; Any process that stops, prevents or decreases the ra…	-	59247250-59247299	ILMN_1806023	GGGAGGTTTGTGAGAGCGAGGCTGAGCCTACAGATGAACTCTTTCTGGCC	2486	S	6510367	NP_002219.1	NM_002228.3	NM_002228.3	RefSeq	NM_002228.3	Homo sapiens	JUN	AP1; c-Jun	JUN	ILMN_7746
0.622881	NM_001040138.1	5080367	16	16q21e	"Homo sapiens chemokine-like factor (CKLF), transcript variant 5, mRNA."	51192	93141023	CKLF	UCK-1; CKLF1; CKLF4; CKLF2; CKLF3; C32; HSPC224	"The space external to the outermost structure of a cell. For cells without external protective or external encapsulating structures this refers to space outside of the plasma membrane. This term covers the host cell environment outside an intracellular parasite [goid 5576] [pmid 11415443] [evidence IDA]; That part of a multicellular organism outside the cells proper, usually taken to be outside …	The function of a family of chemotactic pro-inflammatory activation-inducible cytokines acting primarily upon hemopoietic cells in immunoregulatory processes; all chemokines possess a number of conserved cysteine residues involved in intramolecular disulfide bond formation [goid 8009] [pmid 11415443] [evidence IDA]	"The directed movement of a motile cell or organism, or the directed growth of a cell guided by a specific chemical concentration gradient. Movement may be towards a higher concentration (positive chemotaxis) or towards a lower concentration (negative chemotaxis) [goid 6935] [evidence IEA]; The multiplication or reproduction of cells, resulting in the expansion of a cell population [goid 8283] [p…	+	65144146-65144195	ILMN_1712389	ACATCGCCCCTTCTGCTTCAGTGTGAAAGGCCACGTGAAGATGCTGCGGC	180	A	5080367	NP_001035228.1	NM_001040138.1	NM_016326.2	RefSeq	NM_001040138.1	Homo sapiens	CKLF	UCK-1; CKLF1; CKLF4; CKLF2; CKLF3; C32; HSPC224	CKLF	ILMN_162781
0.623054	NR_001566.1	3420678	3	3q26.2b	"Homo sapiens telomerase RNA component (TERC), telomerase RNA."	7012	38176147	TERC	TRC3; TR; hTR; SCARNA19				-	170965371-170965420	ILMN_1766573	GCGGAAAAGCCTCGGCCTGCCGCCTTCCACCGTTCATTCTAGAGCAAACA	122	S	3420678		NR_001566.1	NR_001566.1	RefSeq	NR_001566.1	Homo sapiens	TERC	TRC3; TR; hTR; SCARNA19	TERC	ILMN_24848
0.623085	NM_001786.2	2760603	10	10q21.2a	"Homo sapiens cell division cycle 2, G1 to S and G2 to M (CDC2), transcript variant 1, mRNA."	983	16306490	CDC2*	DKFZp686L20222; CDK1; MGC111195; CDC28A	"A membrane-bounded organelle of eukaryotic cells in which chromosomes are housed and replicated. In most cells, the nucleus contains all of the cell's chromosomes except the organellar chromosomes, and is the site of RNA synthesis and processing. In some species, or in specialized cell types, RNA metabolism or DNA replication may be absent [goid 5634] [pmid 18029348] [evidence IDA]; A membrane-b…	"Interacting selectively with a nucleotide, any compound consisting of a nucleoside that is esterified with (ortho)phosphate or an oligophosphate at any hydroxyl group on the ribose or deoxyribose moiety [goid 166] [evidence IEA]; Catalysis of the reaction: ATP + a protein = ADP + a phosphoprotein; dependent on the binding of a regulatory cyclin subunit and full activity requires stimulatory phos…	"The process of introducing a phosphate group on to a protein [goid 6468] [evidence IEA]; A process which directly inhibits any of the steps required for cell death by apoptosis [goid 6916] [pmid 11069302] [evidence IDA]; The progression of biochemical and morphological phases and events that occur in a cell during successive cell replication or nuclear replication events. Canonically, the cell c…	+	62217917-62217966	ILMN_1710428	GACAAAGGAACAATTAAACTGGCTGATTTTGGCCTTGCCAGAGCTTTTGG	541	I	2760603	NP_001777.1	NM_001786.2	NM_001786.2	RefSeq	NM_001786.2	Homo sapiens	CDC2	DKFZp686L20222; CDK1; MGC111195; CDC28A	CDC2	ILMN_24793
0.623494	NM_001018.3	6290609	19	19p13.3h	"Homo sapiens ribosomal protein S15 (RPS15), mRNA."	6209	71284430	RPS15	RIG; MGC111130	"The living contents of a cell; the matter contained within (but not including) the plasma membrane, usually taken to exclude large vacuoles and masses of secretory or ingested material. In eukaryotes it includes the nucleus and cytoplasm [goid 5622] [evidence IEA]; A membrane-bounded organelle of eukaryotic cells in which chromosomes are housed and replicated. In most cells, the nucleus contains…	Interacting selectively with DNA (deoxyribonucleic acid) [goid 3677] [pmid 2159154] [evidence NAS]; Interacting selectively with DNA (deoxyribonucleic acid) [goid 3677] [pmid 2821540] [evidence NAS]; The action of a molecule that contributes to the structural integrity of the ribosome [goid 3735] [evidence IEA]; Interacting selectively with any protein or protein complex (a complex of two or more…	The directed movement of a ribosomal small subunit from the nucleus into the cytoplasm [goid 56] [pmid 16037817] [evidence IMP]; The successive addition of amino acid residues to a nascent polypeptide chain during protein biosynthesis [goid 6414] [pmid 15189156] [evidence EXP]	+	1389365-1389414	ILMN_2219131	CAGTCTCGCGATAACTGCGCAGGCGCGGACCAAAGCGATCTCTTCTGAGG	3	S	6290609	NP_001009.1	NM_001018.3	NM_001018.3	RefSeq	NM_001018.3	Homo sapiens	RPS15	RIG; MGC111130	RPS15	ILMN_4289
0.623782	NM_001813.2	6100564	4	4q24b	"Homo sapiens centromere protein E, 312kDa (CENPE), mRNA."	1062	71061467	CENPE	KIF10	"The region of a chromosome that includes the centromere and associated proteins. In monocentric chromosomes, this region corresponds to a single area of the chromosome, whereas in holocentric chromosomes, it is evenly distributed along the chromosome [goid 775] [pmid 11084331] [evidence IDA]; The region of a condensed chromosome kinetochore most external to centromeric DNA; this outer region med…	"Interacting selectively with a nucleotide, any compound consisting of a nucleoside that is esterified with (ortho)phosphate or an oligophosphate at any hydroxyl group on the ribose or deoxyribose moiety [goid 166] [evidence IEA]; Catalysis of movement along a microtubule, coupled to the hydrolysis of a nucleoside triphosphate (usually ATP) [goid 3777] [pmid 9363944] [evidence TAS]; Interacting s…	"Progression through metaphase, the stage of mitosis at which chromosomes are firmly attached to the mitotic spindle at its equator but have not yet segregated to opposite poles [goid 89] [pmid 2022189] [evidence TAS]; Movement of organelles, other microtubules and other particles along microtubules, mediated by motor proteins [goid 7018] [evidence IEA]; The progression of biochemical and morphol…	-	104246876-104246922:104249409-104249411	ILMN_1716279	CCAGAGGTGCAAAATGCAGGAGCAGAGAGTGTGGATTCTCAGCCAGGTCC	8098	S	6100564	NP_001804.2	NM_001813.2	NM_001813.2	RefSeq	NM_001813.2	Homo sapiens	CENPE	KIF10	CENPE	ILMN_7509
0.623857	NM_022346.3	1450280	4	4p15.32b	"Homo sapiens non-SMC condensin I complex, subunit G (NCAPG), mRNA."	64151	50658080	NCAPG	NY-MEL-3; FLJ12450; HCAP-G; MGC126525; CHCG; CAPG	"A membrane-bounded organelle of eukaryotic cells in which chromosomes are housed and replicated. In most cells, the nucleus contains all of the cell's chromosomes except the organellar chromosomes, and is the site of RNA synthesis and processing. In some species, or in specialized cell types, RNA metabolism or DNA replication may be absent [goid 5634] [pmid 10910072] [evidence NAS]; All of the c…	Interacting selectively with any protein or protein complex (a complex of two or more proteins that may include other nonprotein molecules) [goid 5515] [pmid 17353931] [evidence IPI]	"The progression of biochemical and morphological phases and events that occur in a cell during successive cell replication or nuclear replication events. Canonically, the cell cycle comprises the replication and segregation of genetic material followed by the division of the cell, but in endocycles or syncytial cells nuclear replication or nuclear division may not be followed by cell division [g…	+	17453041-17453090	ILMN_1751444	AGTGACAGTTTCAGCTAGGACGAACAGGAGGTGTCAGACTGCTGAAGCCG	3041	S	1450280	NP_071741.2	NM_022346.3	NM_022346.3	RefSeq	NM_022346.3	Homo sapiens	NCAPG	NY-MEL-3; FLJ12450; HCAP-G; MGC126525; CHCG; CAPG	NCAPG	ILMN_23620
0.624251	NM_001034194.1	3520070	4	4q27c	"Homo sapiens exosome component 9 (EXOSC9), transcript variant 1, mRNA."	5393	77812671	EXOSC9	p5; PMSCL1; PM/Scl-75; p6; Rrp45p; RRP45	"Complex of 3'-5' exoribonucleases found in the nucleus [goid 176] [pmid 11879549] [evidence NAS]; A membrane-bounded organelle of eukaryotic cells in which chromosomes are housed and replicated. In most cells, the nucleus contains all of the cell's chromosomes except the organellar chromosomes, and is the site of RNA synthesis and processing. In some species, or in specialized cell types, RNA me…	"Catalysis of the sequential cleavage of mononucleotides from a free 3' terminus of an RNA molecule [goid 175] [pmid 11879549] [evidence NAS]; Interacting selectively with an RNA molecule or a portion thereof [goid 3723] [pmid 11879549] [evidence NAS]; Catalysis of the hydrolysis of ester linkages within nucleic acids by removing nucleotide residues from the 3' or 5' end [goid 4527] [evidence IEA…	Any process involved in the conversion of a primary ribosomal RNA (rRNA) transcript into one or more mature rRNA molecules [goid 6364] [pmid 11879549] [evidence NAS]; Any process involved in the conversion of one or more primary RNA transcripts into one or more mature RNA molecules [goid 6396] [evidence IEA]; Any immune system process that functions in the calibrated response of an organism to a …	+	122735084-122735133	ILMN_2312719	CTGGGGTGATCTTGAAGACTCTGAGAAGGAAGATGATGAAGGCGGTGGTG	1146	A	3520070	NP_001029366.1	NM_001034194.1	NM_001034194.1	RefSeq	NM_001034194.1	Homo sapiens	EXOSC9	p5; PMSCL1; PM/Scl-75; p6; Rrp45p; RRP45	EXOSC9	ILMN_26957
0.624541	NM_018131.3	7510709	10	10q23.33b	"Homo sapiens centrosomal protein 55kDa (CEP55), mRNA."	55165	34147683	CEP55	URCC6; C10orf3; FLJ10540			"The progression of biochemical and morphological phases and events that occur in a cell during successive cell replication or nuclear replication events. Canonically, the cell cycle comprises the replication and segregation of genetic material followed by the division of the cell, but in endocycles or syncytial cells nuclear replication or nuclear division may not be followed by cell division [g…	+	95278458-95278507	ILMN_1747016	GCTGTGTTCCCCAACTCTGTTCTGCGCACGAAACAGTATCTGTTTGAGGC	2237	S	7510709	NP_060601.2	NM_018131.3	NM_018131.3	RefSeq	NM_018131.3	Homo sapiens	CEP55	URCC6; C10orf3; FLJ10540	CEP55	ILMN_6470
0.627269	NM_014865.2	2680497	12	12p13.31d	"Homo sapiens non-SMC condensin I complex, subunit D2 (NCAPD2), mRNA."	9918	41281520	NCAPD2	hCAP-D2; KIAA0159; CAP-D2; CNAP1	"A highly compacted molecule of DNA and associated proteins resulting in a cytologically distinct structure [goid 793] [pmid 10101332] [evidence IDA]; The core heterodimer of a condensin complex, a multisubunit protein complex that plays a central role in chromosome condensation [goid 797] [pmid 10958694] [evidence NAS]; A membrane-bounded organelle of eukaryotic cells in which chromosomes are ho…	"The selective, often stoichiometric, interaction of a molecule with one or more specific sites on another molecule [goid 5488] [evidence IEA]; Interacting selectively with a histone, any of a group of water-soluble proteins found in association with the DNA of plant and animal chromosomes. They are involved in the condensation and coiling of chromosomes during cell division and have also been im…	"The progression of biochemical and morphological phases and events that occur in a cell during successive cell replication or nuclear replication events. Canonically, the cell cycle comprises the replication and segregation of genetic material followed by the division of the cell, but in endocycles or syncytial cells nuclear replication or nuclear division may not be followed by cell division [g…	+	6510846-6510895	ILMN_1775008	GATCCTAGGAAGTCTGTTCCTGTCCTCCCTGTGCAGGGTATCCTGTAGGG	4257	S	2680497	NP_055680.2	NM_014865.2	NM_014865.2	RefSeq	NM_014865.2	Homo sapiens	NCAPD2	hCAP-D2; KIAA0159; CAP-D2; CNAP1	NCAPD2	ILMN_26621
0.627364	NM_006951.3	2900193	10	10q24.33a	"Homo sapiens TAF5 RNA polymerase II, TATA box binding protein (TBP)-associated factor, 100kDa (TAF5), mRNA."	6877	50363367	TAF5	TAFII100; TAF2D	"A membrane-bounded organelle of eukaryotic cells in which chromosomes are housed and replicated. In most cells, the nucleus contains all of the cell's chromosomes except the organellar chromosomes, and is the site of RNA synthesis and processing. In some species, or in specialized cell types, RNA metabolism or DNA replication may be absent [goid 5634] [pmid 18029348] [evidence IDA]; A membrane-b…	"The function of binding to a specific DNA sequence in order to modulate transcription. The transcription factor may or may not also interact selectively with a protein or macromolecular complex [goid 3700] [pmid 9045704] [evidence TAS]; Catalysis of the reaction: acetyl-CoA + histone = CoA + acetyl-histone [goid 4402] [pmid 10373431] [evidence IDA]; The formation of a protein dimer, a macromolec…	"Any process that modulates the frequency, rate or extent of DNA-dependent transcription [goid 6355] [evidence IEA]; Any process involved in starting transcription from the RNA polymerase II promoter [goid 6367] [pmid 9045704] [evidence IDA]; Any process involved in starting transcription from the RNA polymerase II promoter [goid 6367] [pmid 8946909] [evidence EXP]; The extension of an RNA molecu…	+	105137350-105137399	ILMN_1684802	GTAGGGTTCCTTTCTTAGATCTAGAGGAAGTACAGCCACCCACTGACATC	2933	S	2900193	NP_008882.2	NM_006951.3	NM_006951.3	RefSeq	NM_006951.3	Homo sapiens	TAF5	TAFII100; TAF2D	TAF5	ILMN_181009
0.628593	NM_018319.3	2060110	14	14q32.11a	"Homo sapiens tyrosyl-DNA phosphodiesterase 1 (TDP1), transcript variant 1, mRNA."	55775	57242803	TDP1	FLJ11090; MGC104252	"A membrane-bounded organelle of eukaryotic cells in which chromosomes are housed and replicated. In most cells, the nucleus contains all of the cell's chromosomes except the organellar chromosomes, and is the site of RNA synthesis and processing. In some species, or in specialized cell types, RNA metabolism or DNA replication may be absent [goid 5634] [pmid 10521354] [evidence NAS]; All of the c…	"Catalysis of the hydrolysis of ester linkages within nucleic acids by removing nucleotide residues from the 3' or 5' end [goid 4527] [evidence IEA]; Catalysis of the hydrolysis of various bonds, e.g. C-O, C-N, C-C, phosphoric anhydride bonds, etc. Hydrolase is the systematic name for any enzyme of EC class 3 [goid 16787] [evidence IEA]; Catalysis of the hydrolysis of covalent intermediates (in D…	"The process of restoring DNA after damage. Genomes are subject to damage by chemical and physical agents in the environment (e.g. UV and ionizing radiations, chemical mutagens, fungal and bacterial toxins, etc.) and by free radicals or alkylating agents endogenously generated in metabolism. DNA is also damaged because of errors during its replication. A variety of different DNA repair pathways h…	+	89492690-89492739	ILMN_2285713	CTGTATTAAAAAGGCAAATCGAAGGCCGGGCGCGGTGACTCACGCCTGTC	85	I	2060110	NP_060789.2	NM_018319.3	NM_018319.3	RefSeq	NM_018319.3	Homo sapiens	TDP1	FLJ11090; MGC104252	TDP1	ILMN_166533
0.629036	NM_015895.3	4830373	6	6p22.2b	"Homo sapiens geminin, DNA replication inhibitor (GMNN), mRNA."	51053	41393571	GMNN	Gem; RP3-369A17.3	"A membrane-bounded organelle of eukaryotic cells in which chromosomes are housed and replicated. In most cells, the nucleus contains all of the cell's chromosomes except the organellar chromosomes, and is the site of RNA synthesis and processing. In some species, or in specialized cell types, RNA metabolism or DNA replication may be absent [goid 5634] [evidence IEA]; That part of the nuclear con…	Interacting selectively with any protein or protein complex (a complex of two or more proteins that may include other nonprotein molecules) [goid 5515] [pmid 15232106] [evidence IPI]	"Any process that stops, prevents or reduces the frequency, rate or extent of DNA replication [goid 8156] [pmid 9635433] [evidence IDA]; Morphogenesis of an organ. An organ is defined as a tissue or set of tissues that work together to perform a specific function or functions. Morphogenesis is the process by which anatomical structures are generated and organized. Organs are commonly observed as …	+	24785941-24785990	ILMN_1720114	GAGGATTCTCTAGTGGAAGACTCAGAAATTGGCACGTGTGCTGAAGGAAC	878	S	4830373	NP_056979.1	NM_015895.3	NM_015895.3	RefSeq	NM_015895.3	Homo sapiens	GMNN	Gem; RP3-369A17.3	GMNN	ILMN_20255
0.629184	NM_016084.3	2710735	17	17p11.2g	"Homo sapiens RAS, dexamethasone-induced 1 (RASD1), mRNA."	51655	22027484	RASD1	MGC:26290; DEXRAS1; AGS1	"The living contents of a cell; the matter contained within (but not including) the plasma membrane, usually taken to exclude large vacuoles and masses of secretory or ingested material. In eukaryotes it includes the nucleus and cytoplasm [goid 5622] [evidence IEA]; The membrane surrounding a cell that separates the cell from its external environment. It consists of a phospholipid bilayer and ass…	"Interacting selectively with a nucleotide, any compound consisting of a nucleoside that is esterified with (ortho)phosphate or an oligophosphate at any hydroxyl group on the ribose or deoxyribose moiety [goid 166] [evidence IEA]; Catalysis of the reaction: GTP + H2O = GDP + phosphate [goid 3924] [pmid 10471929] [evidence TAS]; Interacting selectively with GTP, guanosine triphosphate [goid 5525] …	"The cascade of processes by which a signal interacts with a receptor, causing a change in the level or activity of a second messenger or other downstream target, and ultimately effecting a change in the functioning of the cell [goid 7165] [pmid 10673050] [evidence TAS]; The cascade of processes by which a signal interacts with a receptor, causing a change in the level or activity of a second mes…	-	17398006-17398055	ILMN_1740426	GTCAGGACCCACGGGGCATTATCTTGTCTGTGATTCCGGGTTGCTGTGAC	1441	S	2710735	NP_057168.1	NM_016084.3	NM_016084.3	RefSeq	NM_016084.3	Homo sapiens	RASD1	MGC:26290; DEXRAS1; AGS1	RASD1	ILMN_13561
0.629293	NM_199342.1	630086	1	1p34.2a	"Homo sapiens coiled-coil domain containing 23 (CCDC23), mRNA."	374969	40786403	CCDC23					-	43045619-43045668	ILMN_2050023	CCCCAGGTTCAAACCAGATGGGATCCTGAGAGCTTTGAGAGGGTGTTGCC	303	S	630086	NP_955374.1	NM_199342.1	NM_199342.1	RefSeq	NM_199342.1	Homo sapiens	CCDC23		CCDC23	ILMN_26398
0.629591	NR_002959.1	1090148	11	11q21a	"Homo sapiens small nucleolar RNA, H/ACA box 18 (SNORA18), small nucleolar RNA."	677805	91680826	SNORA18	ACA18				-	93466708-93466757	ILMN_3244348	GGTCTATCCCGATGGGGCTTTTCCTGTAGCCTGCACATCGTTGGAAACGC	6	S	1090148		NR_002959.1	NR_002959.1	RefSeq	NR_002959.1	Homo sapiens	SNORA18	ACA18	SNORA18	ILMN_180420
0.630023	XM_001129232.1	4610608			"PREDICTED: Homo sapiens similar to Ubiquitin-conjugating enzyme E2S (Ubiquitin-conjugating enzyme E2-24 kDa) (Ubiquitin-protein ligase) (Ubiquitin carrier protein) (E2-EPF5) (LOC731049), mRNA."	731049	113430895	LOC731049	E2-EPF						ILMN_1808591	CGGCGGCTGTAGTGGGCTCTCTTCCTCCTTCCACCGTGACCCCAACCTCT	851	S	4610608	XP_001129232.1	XM_001129232.1	NM_014501.1	RefSeq	XM_001129232.1	Homo sapiens	LOC731049		LOC731049	ILMN_180228
0.630162	NR_002448.1	2750446	9	9q34.2a	"Homo sapiens small nucleolar RNA, C/D box 36A (SNORD36A), small nucleolar RNA."	26815	72255553	SNORD36A	RNU36A; U36a				+	135207152-135207201	ILMN_2135175	CACTGAATTCAACCTTGAAGTGCGAATCCATGAGCTTTTTAACCCTGAGC	21	S	2750446		NR_002448.1	NR_002448.1	RefSeq	NR_002448.1	Homo sapiens	SNORD36A	RNU36A; U36a	SNORD36A	ILMN_20691
0.631276	NM_019554.2	5290270	1	1q21.3c	"Homo sapiens S100 calcium binding protein A4 (S100A4), transcript variant 2, mRNA."	6275	115430249	S100A4	FSP1; MTS1; 18A2; PEL98; P9KA; CAPL; 42A	"A membrane-bounded organelle of eukaryotic cells in which chromosomes are housed and replicated. In most cells, the nucleus contains all of the cell's chromosomes except the organellar chromosomes, and is the site of RNA synthesis and processing. In some species, or in specialized cell types, RNA metabolism or DNA replication may be absent [goid 5634] [pmid 18029348] [evidence IDA]; A small, den…	Interacting selectively with calcium ions (Ca2+) [goid 5509] [pmid 8204608] [evidence TAS]; Interacting selectively with any protein or protein complex (a complex of two or more proteins that may include other nonprotein molecules) [goid 5515] [pmid 15479433] [evidence IPI]; Interacting selectively with any protein or protein complex (a complex of two or more proteins that may include other nonpr…	"A transition where an epithelial cell loses apical/basolateral polarity, severs intercellular adhesive junctions, degrades basement membrane components and becomes a migratory mesenchymal cell [goid 1837] [pmid 14679171] [evidence TAS]"	-	153517235-153517270:153517271-153517284	ILMN_1684306	ATCCTGACTGCTGTCATGGCGTGCCCTCTGGAGAAGGCCCTGGATGTGAT	104	A	5290270	NP_062427.1	NM_019554.2	NM_002961.2	RefSeq	NM_019554.2	Homo sapiens	S100A4	FSP1; MTS1; 18A2; PEL98; P9KA; CAPL; 42A	S100A4	ILMN_20183
0.631998	XR_017490.2	6370224	7	7q33b	"PREDICTED: Homo sapiens misc_RNA (LOC647081), miscRNA."	647081	169171143	LOC647081					+	134780243-134780292	ILMN_3290800	AGAACTGATGTAAGCCTCTTTGCCTCTGCTTGTCATGCCATTAAGCTCAC	509	M	6370224		XR_017490.2	XR_017490.2	RefSeq	XR_017490.2	Homo sapiens	LOC647081		LOC647081	ILMN_182738
0.632042	NM_001048197.1	3710373	1	1p35.3b	"Homo sapiens SNHG3-RCC1 readthrough transcript (SNHG3-RCC1), transcript variant 1, mRNA."	751867	114796647	SNHG3-RCC1	CHC1; RCC1-I				+	28737782-28737831	ILMN_1707493	TTCACCTGCAGCCAACGGCCTGGAATCGCAAAGAGACACCACTCTGGGCA	2304	S	3710373	NP_001041662.1	NM_001048197.1	NM_001269.2	RefSeq	NM_001048197.1	Homo sapiens	SNHG3-RCC1		SNHG3-RCC1	ILMN_167397
0.633282	NM_019554.2	3990458	1	1q21.3c	"Homo sapiens S100 calcium binding protein A4 (S100A4), transcript variant 2, mRNA."	6275	115430249	S100A4	FSP1; MTS1; 18A2; PEL98; P9KA; CAPL; 42A	"A membrane-bounded organelle of eukaryotic cells in which chromosomes are housed and replicated. In most cells, the nucleus contains all of the cell's chromosomes except the organellar chromosomes, and is the site of RNA synthesis and processing. In some species, or in specialized cell types, RNA metabolism or DNA replication may be absent [goid 5634] [pmid 18029348] [evidence IDA]; A small, den…	Interacting selectively with calcium ions (Ca2+) [goid 5509] [pmid 8204608] [evidence TAS]; Interacting selectively with any protein or protein complex (a complex of two or more proteins that may include other nonprotein molecules) [goid 5515] [pmid 15479433] [evidence IPI]; Interacting selectively with any protein or protein complex (a complex of two or more proteins that may include other nonpr…	"A transition where an epithelial cell loses apical/basolateral polarity, severs intercellular adhesive junctions, degrades basement membrane components and becomes a migratory mesenchymal cell [goid 1837] [pmid 14679171] [evidence TAS]"	-	153518231-153518280	ILMN_1688780	TTCTTCCCCTCTCTACAACCCTCTCTCCTCAGCGCTTCTTCTTTCTTGGT	2	I	3990458	NP_062427.1	NM_019554.2	NM_002961.2	RefSeq	NM_019554.2	Homo sapiens	S100A4	FSP1; MTS1; 18A2; PEL98; P9KA; CAPL; 42A	S100A4	ILMN_20183
0.633461	NM_001048201.1	2940110	19	19p13.3c	"Homo sapiens ubiquitin-like with PHD and ring finger domains 1 (UHRF1), transcript variant 1, mRNA."	29128	115430234	UHRF1	huNp95; Np95; ICBP90; RNF106; FLJ21925	"A membrane-bounded organelle of eukaryotic cells in which chromosomes are housed and replicated. In most cells, the nucleus contains all of the cell's chromosomes except the organellar chromosomes, and is the site of RNA synthesis and processing. In some species, or in specialized cell types, RNA metabolism or DNA replication may be absent [goid 5634] [evidence IEA]"	"The function of binding to a specific DNA sequence in order to modulate transcription. The transcription factor may or may not also interact selectively with a protein or macromolecular complex [goid 3700] [pmid 1868030] [evidence TAS]; The function of binding to a specific DNA sequence in order to modulate transcription. The transcription factor may or may not also interact selectively with a p…	"The process of restoring DNA after damage. Genomes are subject to damage by chemical and physical agents in the environment (e.g. UV and ionizing radiations, chemical mutagens, fungal and bacterial toxins, etc.) and by free radicals or alkylating agents endogenously generated in metabolism. DNA is also damaged because of errors during its replication. A variety of different DNA repair pathways h…	+	4912360-4912409	ILMN_1786065	CCAGTTCTTCCTGACACCGGATGGGTGCTTGGGAACCGTTTGAGCCTTAT	3416	S	2940110	NP_001041666.1	NM_001048201.1	NM_013282.2	RefSeq	NM_001048201.1	Homo sapiens	UHRF1	Np95; hNP95; MGC138707; ICBP90; RNF106; FLJ21925	UHRF1	ILMN_162952
0.633559	NM_030928.2	2630433	16	16q24.3a	"Homo sapiens chromatin licensing and DNA replication factor 1 (CDT1), mRNA."	81620	19923847	CDT1	RIS2; DUP	"A membrane-bounded organelle of eukaryotic cells in which chromosomes are housed and replicated. In most cells, the nucleus contains all of the cell's chromosomes except the organellar chromosomes, and is the site of RNA synthesis and processing. In some species, or in specialized cell types, RNA metabolism or DNA replication may be absent [goid 5634] [pmid 11125146] [evidence IDA]; That part of…	Interacting selectively with DNA (deoxyribonucleic acid) [goid 3677] [evidence ISS]; Interacting selectively with any protein or protein complex (a complex of two or more proteins that may include other nonprotein molecules) [goid 5515] [pmid 15232106] [evidence IPI]	"A signal transduction based surveillance mechanism that prevents the initiation of mitosis until DNA replication is complete, thereby ensuring that progeny inherit a full complement of the genome [goid 76] [pmid 14672932] [evidence IDA]; The process whereby new strands of DNA are synthesized. The template for replication can either be an existing DNA molecule or RNA [goid 6260] [evidence IEA]; T…	+	87403077-87403126	ILMN_1651237	GAGCCTCCAGAAGGGACTGGCCTCTGCCCACACCTTGACTTCAGTATTTC	2585	S	2630433	NP_112190.1	NM_030928.2	NM_030928.2	RefSeq	NM_030928.2	Homo sapiens	CDT1	DUP; RIS2	CDT1	ILMN_18895
0.633778	NM_001789.2	2480341	3	3p21.31f	"Homo sapiens cell division cycle 25 homolog A (S. pombe) (CDC25A), transcript variant 1, mRNA."	993	42490757	CDC25A	CDC25A2	"The part of a cell or its extracellular environment in which a gene product is located. A gene product may be located in one or more parts of a cell and its location may be as specific as a particular macromolecular complex, that is, a stable, persistent association of macromolecules that function together [goid 5575] [evidence ND ]; The living contents of a cell; the matter contained within (bu…	"Catalysis of the reaction: protein tyrosine phosphate + H2O = protein tyrosine + phosphate [goid 4725] [evidence IEA]; Interacting selectively with any protein or protein complex (a complex of two or more proteins that may include other nonprotein molecules) [goid 5515] [pmid 17292828] [evidence IPI]; Catalysis of the hydrolysis of various bonds, e.g. C-O, C-N, C-C, phosphoric anhydride bonds, e…	"Any process that modulates the frequency, rate or extent of CDK activity [goid 79] [pmid 11139144] [evidence TAS]; The process whereby new strands of DNA are synthesized. The template for replication can either be an existing DNA molecule or RNA [goid 6260] [pmid 12791985] [evidence EXP]; The process of removing one or more phosphoric residues from a protein [goid 6470] [evidence IEA]; The progr…	-	48199787-48199836	ILMN_1711005	GGTGCCAGCCTCCTTACCATCACGGCTTCACTGAGGTGTAGGTGGGTTTT	3330	A	2480341	NP_001780.2	NM_001789.2	NM_001789.2	RefSeq	NM_001789.2	Homo sapiens	CDC25A	CDC25A2	CDC25A	ILMN_174259
0.634625	NM_001025249.1	6330494	15	15q21.1d	"Homo sapiens deoxyuridine triphosphatase (DUT), nuclear gene encoding mitochondrial protein, transcript variant 3, mRNA."	1854	70906443	DUT	dUTPase; FLJ20622	"A semiautonomous, self replicating organelle that occurs in varying numbers, shapes, and sizes in the cytoplasm of virtually all eukaryotic cells. It is notably the site of tissue respiration [goid 5739] [evidence IEA]; A membrane-bounded organelle of eukaryotic cells in which chromosomes are housed and replicated. In most cells, the nucleus contains all of the cell's chromosomes except the orga…	"Catalysis of the reaction: dUTP + H2O = dUMP + diphosphate [goid 4170] [evidence IEA]; Catalysis of the hydrolysis of various bonds, e.g. C-O, C-N, C-C, phosphoric anhydride bonds, etc. Hydrolase is the systematic name for any enzyme of EC class 3 [goid 16787] [evidence IEA]; Interacting selectively with magnesium (Mg) ions [goid 287] [evidence IEA]; Catalysis of the reaction: dUTP + H2O = dUMP …	"The chemical reactions and pathways involving dUTP, deoxyuridine (5'-)triphosphate [goid 46080] [evidence IEA]; The chemical reactions and pathways involving nucleobases, nucleosides, nucleotides and nucleic acids [goid 6139] [pmid 1325640] [evidence TAS]; The process whereby new strands of DNA are synthesized. The template for replication can either be an existing DNA molecule or RNA [goid 6260…	+	46422615-46422664	ILMN_2374778	GGAGTGCTTCTGGAACTATCAGCCCACTTGACCACCCAGTTTGTGGAAGC	1583	A	6330494	NP_001020420.1	NM_001025249.1	NM_001025249.1	RefSeq	NM_001025249.1	Homo sapiens	DUT	dUTPase; FLJ20622	DUT	ILMN_7273
0.634666	NM_203467.1	10253	14	14q22.1a	"Homo sapiens peptidylprolyl isomerase (cyclophilin)-like 5 (PPIL5), transcript variant 3, mRNA."	122769	45439345	PPIL5	MGC20689; 4-1BBLRR; LRR-1		Interacting selectively with any protein or protein complex (a complex of two or more proteins that may include other nonprotein molecules) [goid 5515] [evidence IEA]; Catalysis of the geometric or structural changes within one molecule. Isomerase is the systematic name for any enzyme of EC class 5 [goid 16853] [evidence IEA]	"The chemical reactions and pathways resulting in the breakdown of a protein or peptide by hydrolysis of its peptide bonds, initiated by the covalent attachment of a ubiquitin moiety, or multiple ubiquitin moieties, to the protein [goid 6511] [evidence IEA]"	+	49150854-49150882:49150883-49150903	ILMN_1715616	GTTGCCCACACTGTGGTCTTAGTAGATAATTTGGGTGGTACTGAAGCACC	737	A	10253	NP_982292.1	NM_203467.1	NM_152329.3	RefSeq	NM_203467.1	Homo sapiens	PPIL5	MGC20689; 4-1BBLRR; LRR-1	PPIL5	ILMN_11590
0.634846	NM_002689.2	4920537	11	11q13.1c	"Homo sapiens polymerase (DNA directed), alpha 2 (70kD subunit) (POLA2), mRNA."	23649	20127447	POLA2	FLJ21662; FLJ37250	"A membrane-bounded organelle of eukaryotic cells in which chromosomes are housed and replicated. In most cells, the nucleus contains all of the cell's chromosomes except the organellar chromosomes, and is the site of RNA synthesis and processing. In some species, or in specialized cell types, RNA metabolism or DNA replication may be absent [goid 5634] [evidence NAS]; That part of the nuclear con…	"Elemental activities, such as catalysis or binding, describing the actions of a gene product at the molecular level. A given gene product may exhibit one or more molecular functions [goid 3674] [evidence ND ]; Interacting selectively with DNA (deoxyribonucleic acid) [goid 3677] [evidence IEA]; Catalysis of the reaction: deoxynucleoside triphosphate + DNA(n) = diphosphate + DNA(n+1); the synthesi…	"The vectorial transfer of a protein from the cytoplasm into the nucleus, through the nuclear pore and across the nuclear envelope [goid 60] [evidence IEA]; The process whereby new strands of DNA are synthesized. The template for replication can either be an existing DNA molecule or RNA [goid 6260] [pmid 8223465] [evidence NAS]"	+	64821556-64821605	ILMN_1696713	TCCAGAAGTAAGCCAGCTGTGGATCCCGCCCACTCAGAAAAGGCGAGAAG	2371	S	4920537	NP_002680.2	NM_002689.2	NM_002689.2	RefSeq	NM_002689.2	Homo sapiens	POLA2	FLJ37250; FLJ21662	POLA2	ILMN_173939
0.635071	NM_199280.2	6580403	2	2p23.2a	"Homo sapiens family with sequence similarity 179, member A (FAM179A), mRNA."	165186	145587087	FAM179A					+	29128407-29128456	ILMN_3247182	GGGGTGGCCCCTGACAGCAAGACAACTGGCAGCTCATACCCTTTTCAGCT	3355	S	6580403	NP_954974.2	NM_199280.2	NM_199280.2	RefSeq	NM_199280.2	Homo sapiens	FAM179A		FAM179A	ILMN_2089
0.635365	NM_001035004.1	3890711	4	4p15.31d-p15.31b	"Homo sapiens Kv channel interacting protein 4 (KCNIP4), transcript variant 6, mRNA."	80333	78190487	KCNIP4	MGC44947; KCHIP4; CALP	The membrane surrounding a cell that separates the cell from its external environment. It consists of a phospholipid bilayer and associated proteins [goid 5886] [evidence IEA]	Catalysis of the transmembrane transfer of an ion by a voltage-gated channel. An ion is an atom or group of atoms carrying an electric charge by virtue of having gained or lost one or more electrons [goid 5244] [evidence IEA]; Catalysis of facilitated diffusion of a potassium ion (by an energy-independent process) involving passage through a transmembrane aqueous pore or channel without evidence …	"The directed movement of charged atoms or small charged molecules into, out of, within or between cells [goid 6811] [evidence IEA]; The directed movement of potassium ions (K+) into, out of, within or between cells [goid 6813] [evidence IEA]"	-	20730408-20730457	ILMN_2387865	TCTGGTGTAGAGATAGGATGTTGAAAGCTGCCCTGCTATCACCAGTGTAG	2160	A	3890711	NP_001030176.1	NM_001035004.1	NM_001035004.1	RefSeq	NM_001035004.1	Homo sapiens	KCNIP4	MGC44947; KCHIP4; CALP	KCNIP4	ILMN_13305
0.636473	NM_181522.1	4280048	20	20q13.12b	"Homo sapiens WAP four-disulfide core domain 3 (WFDC3), transcript variant 2, mRNA."	140686	32307102	WFDC3	WAP14; dJ447F3.3	The space external to the outermost structure of a cell. For cells without external protective or external encapsulating structures this refers to space outside of the plasma membrane. This term covers the host cell environment outside an intracellular parasite [goid 5576] [evidence IEA]; The space external to the outermost structure of a cell. For cells without external protective or external en…	"Stops, prevents or reduces the activity of serine-type endopeptidases, enzymes that catalyze the hydrolysis of nonterminal peptide bonds in a polypeptide chain; a serine residue (and a histidine residue) are at the active center of the enzyme [goid 4867] [evidence IEA]; Stops, prevents or reduces the activity of a protease, any enzyme catalyzes the hydrolysis peptide bonds [goid 30414] [evidence…		-	43837583-43837592:43837593-43837632	ILMN_2308903	GTCCAAAAGTTCTGGTGGGCCTGTGCATTGTTGGCTGTGTGATGGATGAG	369	A	4280048	NP_852663.1	NM_181522.1	NM_181522.1	RefSeq	NM_181522.1	Homo sapiens	WFDC3	dJ447F3.3; WAP14	WFDC3	ILMN_21897
0.636699	XR_037233.1	5810519		Xp22.13a	"PREDICTED: Homo sapiens misc_RNA (LOC441484), miscRNA."	441484	169216193	LOC441484							ILMN_3215759	GCTTTGGTTGGCAGTGCGGTGGCCCTTGAAACGAAGGATGCCTCACTAAC	314	A	5810519		XR_037233.1	XR_037233.1	RefSeq	XR_037233.1	Homo sapiens	LOC441484		LOC441484	ILMN_349332
0.636711	NM_052844.3	6200195	9	9q34.11b	"Homo sapiens WD repeat domain 34 (WDR34), mRNA."	89891	66267729	WDR34	MGC20486; bA216B9.3; RP11-216B9.5				-	131396227-131396261:131396505-131396519	ILMN_1685928	GCTGCCTCTGGGAAAGGTGACGTGCAGCTGTTTGATCTCCAGAAAAGCTC	1481	S	6200195	NP_443076.2	NM_052844.3	NM_052844.3	RefSeq	NM_052844.3	Homo sapiens	WDR34	MGC20486; bA216B9.3; RP11-216B9.5	WDR34	ILMN_25161
0.638028	NM_199487.1	620075	20	20q11.22b	"Homo sapiens ubiquinol-cytochrome c reductase complex chaperone (UQCC), nuclear gene encoding mitochondrial protein, transcript variant 2, mRNA."	55245	41327686	UQCC	MGC141902; BFZB; C20orf44; CBP3; MGC104353	"A vesicle formed of membrane or protein, found in the cytoplasm of a cell [goid 31410] [evidence IEA]"			-	33890929-33890978	ILMN_2381121	CTCCCAGTGAACTGAATGAGGAACATGCTGTCTCCTGTCTTGGCCTCCCC	1645	A	620075	NP_955781.1	NM_199487.1	NM_199487.1	RefSeq	NM_199487.1	Homo sapiens	UQCC	MGC141902; BFZB; C20orf44; CBP3; MGC104353	UQCC	ILMN_16175
0.638583	NM_001018115.1	2690240	3	3p25.3c-p25.3b	"Homo sapiens Fanconi anemia, complementation group D2 (FANCD2), transcript variant 2, mRNA."	2177	66528887	FANCD2	FACD; FA-D2; FA4; FANCD; DKFZp762A223; FLJ23826; FAD2; FAD	"The part of a cell or its extracellular environment in which a gene product is located. A gene product may be located in one or more parts of a cell and its location may be as specific as a particular macromolecular complex, that is, a stable, persistent association of macromolecules that function together [goid 5575] [evidence ND ]; A membrane-bounded organelle of eukaryotic cells in which chro…	"Elemental activities, such as catalysis or binding, describing the actions of a gene product at the molecular level. A given gene product may exhibit one or more molecular functions [goid 3674] [evidence ND ]; Interacting selectively with any protein or protein complex (a complex of two or more proteins that may include other nonprotein molecules) [goid 5515] [pmid 12874027] [evidence IPI]"	"The process of restoring DNA after damage. Genomes are subject to damage by chemical and physical agents in the environment (e.g. UV and ionizing radiations, chemical mutagens, fungal and bacterial toxins, etc.) and by free radicals or alkylating agents endogenously generated in metabolism. DNA is also damaged because of errors during its replication. A variety of different DNA repair pathways h…	+	10097881-10097912:10098030-10098047	ILMN_2235137	ACTTGTGGACATCATGGATTGTCTAACACCATCACAGTCCCTGGCTCAGG	4886	I	2690240	NP_001018125.1	NM_001018115.1	NM_001018115.1	RefSeq	NM_001018115.1	Homo sapiens	FANCD2	FACD; FA-D2; FA4; FANCD; DKFZp762A223; FLJ23826; FAD2; FAD	FANCD2	ILMN_11844
0.63961	XM_001133149.1	2490328			"PREDICTED: Homo sapiens hypothetical protein LOC731486 (LOC731486), mRNA."	731486	113423142	LOC731486	pp11662; MGC71430; FLJ00171						ILMN_1656938	TCTATGTCCTCCTTCCACCCCAAGTCCCGGATCACTCGCTGTTTTCTGGC	1485	S	2490328	XP_001133149.1	XM_001133149.1	NM_198277.1	RefSeq	XM_001133149.1	Homo sapiens	LOC731486		LOC731486	ILMN_166134
0.640033	NM_018136.3	6130441	1	1q31.3c	"Homo sapiens asp (abnormal spindle) homolog, microcephaly associated (Drosophila) (ASPM), mRNA."	259266	126116595	ASPM	ASP; FLJ10517; FLJ10549; Calmbp1; MCPH5	"A membrane-bounded organelle of eukaryotic cells in which chromosomes are housed and replicated. In most cells, the nucleus contains all of the cell's chromosomes except the organellar chromosomes, and is the site of RNA synthesis and processing. In some species, or in specialized cell types, RNA metabolism or DNA replication may be absent [goid 5634] [evidence IEA]; All of the contents of a cel…	"Interacting selectively with calmodulin, a calcium-binding protein with many roles, both in the calcium-bound and calcium-free states [goid 5516] [evidence IEA]"	"The progression of biochemical and morphological phases and events that occur in a cell during successive cell replication or nuclear replication events. Canonically, the cell cycle comprises the replication and segregation of genetic material followed by the division of the cell, but in endocycles or syncytial cells nuclear replication or nuclear division may not be followed by cell division [g…	-	195320084-195320133	ILMN_1815184	CACAAATCCCCTGCAAGCTATTCAAATGGTGATGGATACGCTTGGCATTC	10474	S	6130441	NP_060606.3	NM_018136.3	NM_018136.2	RefSeq	NM_018136.3	Homo sapiens	ASPM	ASP; FLJ10517; FLJ43117; FLJ10549; Calmbp1; MCPH5; DKFZp686N06184	ASPM	ILMN_408
0.640662	NM_153332.3	5360398	8	8p23.1d	"Homo sapiens exoribonuclease 1 (ERI1), mRNA."	90459	161621248	ERI1	MGC35395; 3'HEXO				+	8890610-8890659	ILMN_3245659	CCACCAACCTGTATATCAAGCCTCCTTGCCCCACAAAGCTTCCAAAGCCC	4376	S	5360398	NP_699163.2	NM_153332.3	NM_153332.3	RefSeq	NM_153332.3	Homo sapiens	ERI1	MGC35395; 3'HEXO	ERI1	ILMN_9945
0.640763	NM_018101.2	4830634	1	1p34.3b	"Homo sapiens cell division cycle associated 8 (CDCA8), mRNA."	55143	51593099	CDCA8	FLJ12042; FLJ10468; BOR	"The region of a chromosome that includes the centromere and associated proteins. In monocentric chromosomes, this region corresponds to a single area of the chromosome, whereas in holocentric chromosomes, it is evenly distributed along the chromosome [goid 775] [evidence IEA]; A membrane-bounded organelle of eukaryotic cells in which chromosomes are housed and replicated. In most cells, the nucl…	Interacting selectively with any protein or protein complex (a complex of two or more proteins that may include other nonprotein molecules) [goid 5515] [pmid 16291752] [evidence IPI]; Interacting selectively with any protein or protein complex (a complex of two or more proteins that may include other nonprotein molecules) [goid 5515] [pmid 16239925] [evidence IPI]	"The progression of biochemical and morphological phases and events that occur in a cell during successive cell replication or nuclear replication events. Canonically, the cell cycle comprises the replication and segregation of genetic material followed by the division of the cell, but in endocycles or syncytial cells nuclear replication or nuclear division may not be followed by cell division [g…	+	37947578-37947627	ILMN_1709294	TGTGACTTGCTTGGTGGCCTCATTCCATGTGTGCCTGTGCCTGGGGCATG	1903	S	4830634	NP_060571.1	NM_018101.2	NM_018101.2	RefSeq	NM_018101.2	Homo sapiens	CDCA8	FLJ12042; FLJ10468; BOR	CDCA8	ILMN_13462
0.641466	NM_001827.1	6200468	9	9q22.2a	"Homo sapiens CDC28 protein kinase regulatory subunit 2 (CKS2), mRNA."	1164	4502858	CKS2	CKSHS2		"Modulates the activity of a cyclin-dependent protein kinase, enzymes of the protein kinase family that are regulated through association with cyclins and other proteins [goid 16538] [evidence IEA]"	"Any process that modulates the frequency, rate or extent of CDK activity [goid 79] [pmid 2227411] [evidence TAS]; The progression of biochemical and morphological phases and events that occur in a cell during successive cell replication or nuclear replication events. Canonically, the cell cycle comprises the replication and segregation of genetic material followed by the division of the cell, bu…	+	91116007-91116027:91116028-91116056	ILMN_1756326	TTTCTGCAGCGCGCCACGAGGATGGCCCACAAGCAGATCTACTACTCGGA	75	S	6200468	NP_001818.1	NM_001827.1	NM_001827.1	RefSeq	NM_001827.1	Homo sapiens	CKS2	CKSHS2	CKS2	ILMN_14702
0.642399	NM_152995.4	1230731	4	4p12a	"Homo sapiens nuclear transcription factor, X-box binding-like 1 (NFXL1), mRNA."	152518	89363019	NFXL1	HOZFP	"A membrane-bounded organelle of eukaryotic cells in which chromosomes are housed and replicated. In most cells, the nucleus contains all of the cell's chromosomes except the organellar chromosomes, and is the site of RNA synthesis and processing. In some species, or in specialized cell types, RNA metabolism or DNA replication may be absent [goid 5634] [evidence IEA]; Double layer of lipid molecu…	The function of binding to a specific DNA sequence in order to modulate transcription. The transcription factor may or may not also interact selectively with a protein or macromolecular complex [goid 3700] [evidence IEA]; Interacting selectively with any protein or protein complex (a complex of two or more proteins that may include other nonprotein molecules) [goid 5515] [evidence IEA]; Interacti…	"Any process that modulates the frequency, rate or extent of DNA-dependent transcription [goid 6355] [evidence IEA]"	-	47849419-47849468	ILMN_1682197	GTGCTGACAACAGGGCTTATGAGGTCTATGTACCTTAATCTCGTTTCTCC	3516	S	1230731	NP_694540.3	NM_152995.4	NM_152995.3	RefSeq	NM_152995.4	Homo sapiens	NFXL1	HOZFP; FLJ16294	NFXL1	ILMN_43252
0.642553	NM_001005176.1	6400681	2	2q37.1a	"Homo sapiens SP140 nuclear body protein (SP140), transcript variant 2, mRNA."	11262	52487276	SP140	MGC126440; LYSP100-B; LYSP100-A	"A membrane-bounded organelle of eukaryotic cells in which chromosomes are housed and replicated. In most cells, the nucleus contains all of the cell's chromosomes except the organellar chromosomes, and is the site of RNA synthesis and processing. In some species, or in specialized cell types, RNA metabolism or DNA replication may be absent [goid 5634] [evidence IEA]; All of the contents of a cel…	Interacting selectively with DNA (deoxyribonucleic acid) [goid 3677] [evidence IEA]; Interacting selectively with any protein or protein complex (a complex of two or more proteins that may include other nonprotein molecules) [goid 5515] [evidence IEA]; Interacting selectively with zinc (Zn) ions [goid 8270] [evidence IEA]; Interacting selectively with any metal ion [goid 46872] [evidence IEA]; Th…	"Reactions, triggered in response to the presence of a foreign body or the occurrence of an injury, which result in restriction of damage to the organism attacked or prevention/recovery from the infection caused by the attack [goid 6952] [pmid 8910577] [evidence TAS]"	+	230811877-230811926	ILMN_2246882	CCATGTGGTTGAATTGCAGACTGTGGGAGGCAGGGTGTGAGAGCTGACTC	678	I	6400681	NP_001005176.1	NM_001005176.1	NM_001005176.1	RefSeq	NM_001005176.1	Homo sapiens	SP140	MGC126440; LYSP100-B; LYSP100-A	SP140	ILMN_6500
0.642807	NM_001040668.1	7550753	19	19q13.33b	"Homo sapiens BCL2-like 12 (proline rich) (BCL2L12), transcript variant 3, mRNA."	83596	100913020	BCL2L12	MGC120315; MGC120314; MGC120313			"A form of programmed cell death induced by external or internal signals that trigger the activity of proteolytic caspases, whose actions dismantle the cell and result in cell death. Apoptosis begins internally with condensation and subsequent fragmentation of the cell nucleus (blebbing) while the plasma membrane remains intact. Other characteristics of apoptosis include DNA fragmentation and the…	+	50173740-50173745:50176955-50176998	ILMN_1752953	GGCTGGGAGGGCATCCTGGCTGTTTCACCCGTGGACTTGAACTTGCCATT	1628	A	7550753	NP_001035758.1	NM_001040668.1	NM_052842.2	RefSeq	NM_001040668.1	Homo sapiens	BCL2L12	MGC120315; MGC120314; MGC120313	BCL2L12	ILMN_177176
0.642861	NM_003390.2	2970332	11	11p15.4a	"Homo sapiens WEE1 homolog (S. pombe) (WEE1), mRNA."	7465	19718775	WEE1	WEE1hu; FLJ16446; DKFZp686I18166	"A membrane-bounded organelle of eukaryotic cells in which chromosomes are housed and replicated. In most cells, the nucleus contains all of the cell's chromosomes except the organellar chromosomes, and is the site of RNA synthesis and processing. In some species, or in specialized cell types, RNA metabolism or DNA replication may be absent [goid 5634] [pmid 8348613] [evidence TAS]; That part of …	"Interacting selectively with a nucleotide, any compound consisting of a nucleoside that is esterified with (ortho)phosphate or an oligophosphate at any hydroxyl group on the ribose or deoxyribose moiety [goid 166] [evidence IEA]; Interacting selectively with magnesium (Mg) ions [goid 287] [evidence IEA]; Catalysis of the reaction: ATP + a protein serine/threonine = ADP + protein serine/threonine…	"The process of introducing a phosphate group on to a protein [goid 6468] [evidence IEA]; The progression of biochemical and morphological phases and events that occur in a cell during successive cell replication or nuclear replication events. Canonically, the cell cycle comprises the replication and segregation of genetic material followed by the division of the cell, but in endocycles or syncyt…	+	9567197-9567246	ILMN_1778561	CCCACTGGGAGCACTTTGTAGGCATTGCATGAACCATGGGATGATGATTC	3554	S	2970332	NP_003381.1	NM_003390.2	NM_003390.2	RefSeq	NM_003390.2	Homo sapiens	WEE1	WEE1hu; FLJ16446; DKFZp686I18166	WEE1	ILMN_28737
0.64348	NM_058216.1	7610129	17	17q22d	"Homo sapiens RAD51 homolog C (S. cerevisiae) (RAD51C), transcript variant 1, mRNA."	5889	17402895	RAD51C	MGC104277; RAD51L2	"A membrane-bounded organelle of eukaryotic cells in which chromosomes are housed and replicated. In most cells, the nucleus contains all of the cell's chromosomes except the organellar chromosomes, and is the site of RNA synthesis and processing. In some species, or in specialized cell types, RNA metabolism or DNA replication may be absent [goid 5634] [pmid 9469824] [evidence TAS]"	"Interacting selectively with a nucleotide, any compound consisting of a nucleoside that is esterified with (ortho)phosphate or an oligophosphate at any hydroxyl group on the ribose or deoxyribose moiety [goid 166] [evidence IEA]; Interacting selectively with DNA (deoxyribonucleic acid) [goid 3677] [pmid 9469824] [evidence TAS]; Interacting selectively with ATP, adenosine 5'-triphosphate, a unive…	"The process of restoring DNA after damage. Genomes are subject to damage by chemical and physical agents in the environment (e.g. UV and ionizing radiations, chemical mutagens, fungal and bacterial toxins, etc.) and by free radicals or alkylating agents endogenously generated in metabolism. DNA is also damaged because of errors during its replication. A variety of different DNA repair pathways h…	+	54129143-54129192	ILMN_1760635	GGTTGATAGAGTGGTAGACCTTGCTACTGCCTGCATTCAGCACCTTCAGC	537	I	7610129	NP_478123.1	NM_058216.1	NM_058216.1	RefSeq	NM_058216.1	Homo sapiens	RAD51C	MGC104277; RAD51L2	RAD51C	ILMN_2944
0.64422	NM_024955.4	160181	22	22q12.3d	"Homo sapiens FAD-dependent oxidoreductase domain containing 2 (FOXRED2), mRNA."	80020	34303916	FOXRED2	FLJ33734; FLJ23322		"Any molecular entity that serves as an electron acceptor and electron donor in an electron transport system [goid 9055] [evidence IEA]; Catalysis of an oxidation-reduction (redox) reaction, a reversible chemical reaction in which the oxidation state of an atom or atoms within a molecule is altered. One substrate acts as a hydrogen or electron donor and becomes oxidized, while the other acts as h…	The process of removal or addition of one or more electrons with or without the concomitant removal or addition of a proton or protons [goid 55114] [evidence IEA]	-	35214248-35214297	ILMN_2130635	GCCTAGGTGACAAAGCAAGACCCACAGTAAAGCCCCCACACCCCATCTCA	3870	S	160181	NP_079231.3	NM_024955.4	NM_024955.4	RefSeq	NM_024955.4	Homo sapiens	FOXRED2	FLJ33734; FLJ23322	FOXRED2	ILMN_165686
0.644403	NM_014321.2	4830343	16	16q11.2i	"Homo sapiens origin recognition complex, subunit 6 like (yeast) (ORC6L), mRNA."	23594	32454755	ORC6L	ORC6	"A membrane-bounded organelle of eukaryotic cells in which chromosomes are housed and replicated. In most cells, the nucleus contains all of the cell's chromosomes except the organellar chromosomes, and is the site of RNA synthesis and processing. In some species, or in specialized cell types, RNA metabolism or DNA replication may be absent [goid 5634] [evidence IEA]; That part of the nuclear con…	Interacting selectively with DNA (deoxyribonucleic acid) [goid 3677] [evidence IEA]; Interacting selectively with any protein or protein complex (a complex of two or more proteins that may include other nonprotein molecules) [goid 5515] [pmid 15232106] [evidence IPI]	The process whereby new strands of DNA are synthesized. The template for replication can either be an existing DNA molecule or RNA [goid 6260] [evidence IEA]; The process whereby new strands of DNA are synthesized. The template for replication can either be an existing DNA molecule or RNA [goid 6260] [pmid 12791985] [evidence EXP]	+	45287477-45287498:45288871-45288898	ILMN_1731070	GTGGTTGAAGCCCCAGCAAAGGAAATGGAGAAGGTAGAGGAGATGCCACA	670	S	4830343	NP_055136.1	NM_014321.2	NM_014321.2	RefSeq	NM_014321.2	Homo sapiens	ORC6L	ORC6	ORC6L	ILMN_26697
0.646192	NM_018518.3	6580685	10	10p13e	"Homo sapiens minichromosome maintenance complex component 10 (MCM10), transcript variant 2, mRNA."	55388	33383234	MCM10	PRO2249; CNA43; MGC126776				+	13252247-13252296	ILMN_2413899	ACCACAGCAAAGGTTTCATTCAGGAGATTCTTCCATCTGGGCAACCTGGT	3771	A	6580685	NP_060988.3	NM_018518.3	NM_018518.3	RefSeq	NM_018518.3	Homo sapiens	MCM10	PRO2249; CNA43; MGC126776	MCM10	ILMN_2483
0.646326	NM_024884.1	7040433	14	14q22.1b	"Homo sapiens L-2-hydroxyglutarate dehydrogenase (L2HGDH), mRNA."	79944	13376330	L2HGDH	FLJ12618; C14orf160	"A semiautonomous, self replicating organelle that occurs in varying numbers, shapes, and sizes in the cytoplasm of virtually all eukaryotic cells. It is notably the site of tissue respiration [goid 5739] [pmid 16005139] [evidence IDA]; Penetrating at least one phospholipid bilayer of a membrane. May also refer to the state of being buried in the bilayer with no exposure outside the bilayer. When…	"Catalysis of an oxidation-reduction (redox) reaction, a reversible chemical reaction in which the oxidation state of an atom or atoms within a molecule is altered. One substrate acts as a hydrogen or electron donor and becomes oxidized, while the other acts as hydrogen or electron acceptor and becomes reduced [goid 16491] [evidence IEA]; Catalysis of the reaction: (S)-2-hydroxyglutarate + accept…	"The chemical reactions and pathways involving a specific protein, rather than of proteins in general, occurring at the level of an individual cell. Includes protein modification [goid 44267] [pmid 16005139] [evidence IDA]; The process of removal or addition of one or more electrons with or without the concomitant removal or addition of a proton or protons [goid 55114] [evidence IEA]"	-	49783034-49783083	ILMN_1723211	CACAAAGTTAGCTGGGTCTGGTGCCTCTGTGGTTCCAGCTCCTCAGTAGG	1913	S	7040433	NP_079160.1	NM_024884.1	NM_024884.1	RefSeq	NM_024884.1	Homo sapiens	L2HGDH	FLJ12618; C14orf160	L2HGDH	ILMN_21427
0.646643	NM_182649.1	6900079	20	20p12.3c	"Homo sapiens proliferating cell nuclear antigen (PCNA), transcript variant 2, mRNA."	5111	33239450	PCNA	MGC8367	"Cyclin-dependent protein kinases (CDKs) are heterodimeric enzymes that contain a kinase catalytic subunit associated with a regulatory cyclin partner [goid 307] [evidence IEA]; A membrane-bounded organelle of eukaryotic cells in which chromosomes are housed and replicated. In most cells, the nucleus contains all of the cell's chromosomes except the organellar chromosomes, and is the site of RNA …	Interacting selectively with DNA (deoxyribonucleic acid) [goid 3677] [evidence IEA]; Interacting selectively with any protein or protein complex (a complex of two or more proteins that may include other nonprotein molecules) [goid 5515] [pmid 15358233] [evidence IPI]; Interacting selectively with any protein or protein complex (a complex of two or more proteins that may include other nonprotein m…	"Any process that modulates the frequency, rate or extent of DNA replication [goid 6275] [evidence IEA]; The process of restoring DNA after damage. Genomes are subject to damage by chemical and physical agents in the environment (e.g. UV and ionizing radiations, chemical mutagens, fungal and bacterial toxins, etc.) and by free radicals or alkylating agents endogenously generated in metabolism. DN…	-	5095941-5095990	ILMN_1694177	GCGGATATGGGACACTTAAAATACTACTTGGCTCCCAAGATCGAGGATGA	927	A	6900079	NP_872590.1	NM_182649.1	NM_182649.1	RefSeq	NM_182649.1	Homo sapiens	PCNA	MGC8367	PCNA	ILMN_6858
0.646686	NM_052998.2	130707	1	1p35.1a	"Homo sapiens arginine decarboxylase (ADC), mRNA."	113451	31543358	ADC	ODC1L; KIAA1945; AZI2; ODC-p	"The part of a cell or its extracellular environment in which a gene product is located. A gene product may be located in one or more parts of a cell and its location may be as specific as a particular macromolecular complex, that is, a stable, persistent association of macromolecules that function together [goid 5575] [evidence ND ]; A semiautonomous, self replicating organelle that occurs in va…	"Interacting selectively with any protein or protein complex (a complex of two or more proteins that may include other nonprotein molecules) [goid 5515] [evidence IEA]; Catalysis of the reaction: L-arginine = agmatine + CO2 [goid 8792] [evidence IEA]; Catalysis of the cleavage of C-C, C-O, C-N and other bonds by other means than by hydrolysis or oxidation, or conversely adding a group to a double…	"The chemical reactions and pathways involving ornithine, an amino acid only rarely found in proteins, but which is important in living organisms as an intermediate in the reactions of the urea cycle and in arginine biosynthesis [goid 6591] [evidence IEA]; The chemical reactions and pathways resulting in the formation of polyamines, any organic compound containing two or more amino groups [goid 6…	+	33358486-33358535	ILMN_1659599	ACCCCCGCGCTCCACCTGCAGTGTTTCTGCCCTGTAAATAGGACCAGTCT	2086	S	130707	NP_443724.1	NM_052998.2	NM_052998.2	RefSeq	NM_052998.2	Homo sapiens	ADC	ODC1L; AZI2; ODC-p; KIAA1945	ADC	ILMN_793
0.646723	NM_001129742.1	5720463	10	10q24.33a	"Homo sapiens calcium homeostasis modulator 3 (CALHM3), mRNA."	119395	193211394	CALHM3					-	105232797-105232846	ILMN_3241364	TTAAAGTAGCCCAATCTCTGCCTAGTTTCTGGGTGTGGCCTCCAGCGCGC	1366	S	5720463	NP_001123214.1	NM_001129742.1	NM_001129742.1	RefSeq	NM_001129742.1	Homo sapiens	CALHM3		CALHM3	ILMN_364996
0.646751	NM_015907.2	3290292	4	4p15.32b	"Homo sapiens leucine aminopeptidase 3 (LAP3), mRNA."	51056	41393560	LAP3	LAP; LAPEP; PEPS	"The living contents of a cell; the matter contained within (but not including) the plasma membrane, usually taken to exclude large vacuoles and masses of secretory or ingested material. In eukaryotes it includes the nucleus and cytoplasm [goid 5622] [evidence IEA]; All of the contents of a cell excluding the plasma membrane and nucleus, but including other subcellular structures [goid 5737] [evi…	"Interacting selectively with magnesium (Mg) ions [goid 287] [evidence NAS]; Catalysis of the hydrolysis of N-terminal amino acid residues from in a polypeptide chain [goid 4177] [pmid 1908238] [evidence NAS]; Catalysis of the hydrolysis of a peptide bond. A peptide bond is a covalent bond formed when the carbon atom from the carboxyl group of one amino acid shares electrons with the nitrogen ato…	"The hydrolysis of a peptide bond or bonds within a protein [goid 6508] [pmid 1908238] [evidence NAS]; The chemical reactions and pathways involving a specific protein, rather than of proteins in general. Includes protein modification [goid 19538] [evidence IEA]"	+	17218210-17218259	ILMN_1683792	CCAACAAAGATGAAGTTCCCTATCTACGGAAAGGCATGACTGGGAGGCCC	1622	S	3290292	NP_056991.2	NM_015907.2	NM_015907.2	RefSeq	NM_015907.2	Homo sapiens	LAP3	LAP; LAPEP; PEPS	LAP3	ILMN_12514
0.647232	NM_014708.3	3190524	12	12q24.31c	"Homo sapiens kinetochore associated 1 (KNTC1), mRNA."	9735	41327744	KNTC1	FLJ36151; KIAA0166; ROD	"A multisubunit complex that is located at the centromeric region of a condensed chromosome and provides an attachment point for the spindle microtubules [goid 777] [evidence IEA]; Either of the ends of a spindle, where spindle microtubules are organized; usually contains a microtubule organizing center and accessory molecules, spindle microtubules and astral microtubules [goid 922] [pmid 1114666…	"The function of binding to a specific DNA sequence in order to modulate transcription. The transcription factor may or may not also interact selectively with a protein or macromolecular complex [goid 3700] [evidence IEA]; Interacting selectively with DNA of a specific nucleotide composition, e.g. GC-rich DNA binding, or with a specific sequence motif or type of DNA e.g. promotor binding or rDNA …	"Any process that modulates the frequency, rate or extent of DNA-dependent transcription [goid 6355] [evidence IEA]; The aggregation, arrangement and bonding together of a set of components to form a protein complex [goid 6461] [pmid 11146660] [evidence NAS]; The progression of biochemical and morphological phases and events that occur in a cell during successive cell replication or nuclear repli…	+	121675137-121675186	ILMN_1732516	GCACTGCGGGAAACCTGTGCCTCCAGACACTGCTCCCTGTGAAATTCTGA	6718	S	3190524	NP_055523.1	NM_014708.3	NM_014708.3	RefSeq	NM_014708.3	Homo sapiens	KNTC1	FLJ36151; KIAA0166; ROD	KNTC1	ILMN_25890
0.647389	NM_017426.2	4810358	4	4q21.1a	"Homo sapiens nucleoporin 54kDa (NUP54), mRNA."	53371	26051236	NUP54	MGC13407	"A membrane-bounded organelle of eukaryotic cells in which chromosomes are housed and replicated. In most cells, the nucleus contains all of the cell's chromosomes except the organellar chromosomes, and is the site of RNA synthesis and processing. In some species, or in specialized cell types, RNA metabolism or DNA replication may be absent [goid 5634] [evidence IEA]; Any of the numerous similar …		"The directed movement of proteins into, out of, within or between cells [goid 15031] [evidence IEA]; The directed movement of mRNA, messenger ribonucleic acid, into, out of, within or between cells [goid 51028] [evidence IEA]; The directed movement of proteins in a cell, from one side of a membrane to another [goid 65002] [evidence IEA]"	-	77255190-77255239	ILMN_2061405	CTGTGTTTAATGATTATTGTCCATTGAGCCTGTACTCTGCTTTCCATACC	1955	S	4810358	NP_059122.2	NM_017426.2	NM_017426.2	RefSeq	NM_017426.2	Homo sapiens	NUP54	MGC13407	NUP54	ILMN_170157
0.647458	NM_001641.2	3120309	14	14q11.2b	"Homo sapiens APEX nuclease (multifunctional DNA repair enzyme) 1 (APEX1), transcript variant 1, mRNA."	328	18375500	APEX1	APEX; REF1; APE1; APE-1; HAP1; APE; APX; REF-1; APEN	"The living contents of a cell; the matter contained within (but not including) the plasma membrane, usually taken to exclude large vacuoles and masses of secretory or ingested material. In eukaryotes it includes the nucleus and cytoplasm [goid 5622] [evidence IEA]; A membrane-bounded organelle of eukaryotic cells in which chromosomes are housed and replicated. In most cells, the nucleus contains…	"Interacting selectively with magnesium (Mg) ions [goid 287] [evidence IEA]; Interacting selectively with DNA (deoxyribonucleic acid) [goid 3677] [pmid 11286553] [evidence IDA]; The function of a transcription cofactor that activates transcription from a RNA polymerase II promoter; does not bind DNA itself [goid 3713] [pmid 9119221] [evidence IDA]; The function of a transcription cofactor that re…	"In base excision repair, an altered base is removed by a DNA glycosylase enzyme, followed by excision of the resulting sugar phosphate. The small gap left in the DNA helix is filled in by the sequential action of DNA polymerase and DNA ligase [goid 6284] [pmid 11286553] [evidence TAS]; The synthesis of RNA from a DNA template by RNA polymerase II (Pol II), originating at a Pol II-specific promot…	+	19995147-19995196	ILMN_2319344	GGCTTCCCGAAAGCCCCTTGTGCTGTGTGGAGACCTCAATGTGGCACATG	929	A	3120309	NP_001632.2	NM_001641.2	NM_001641.2	RefSeq	NM_001641.2	Homo sapiens	APEX1	APEX; REF1; APE1; APE-1; HAP1; APE; APX; REF-1; APEN	APEX1	ILMN_9983
0.648594	NM_001042426.1	2600392	2	2p23.3a	"Homo sapiens centromere protein A (CENPA), transcript variant 2, mRNA."	1058	109637778	CENPA		"A complex comprised of DNA wound around a multisubunit core and associated proteins, which forms the primary packing unit of DNA into higher order structures [goid 786] [evidence IEA]; A membrane-bounded organelle of eukaryotic cells in which chromosomes are housed and replicated. In most cells, the nucleus contains all of the cell's chromosomes except the organellar chromosomes, and is the site…	"Interacting selectively with DNA (deoxyribonucleic acid) [goid 3677] [evidence IEA]; Interacting selectively with DNA (deoxyribonucleic acid) [goid 3677] [evidence IEA]; Interacting selectively with chromatin, the network of fibers of DNA and protein that make up the chromosomes of the eukaryotic nucleus during interphase [goid 3682] [pmid 7962047] [evidence TAS]"	"The aggregation, arrangement and bonding together of a nucleosome, the beadlike structural units of eukaryotic chromatin composed of histones and DNA [goid 6334] [evidence IEA]; The aggregation, arrangement and bonding together of a nucleosome, the beadlike structural units of eukaryotic chromatin composed of histones and DNA [goid 6334] [evidence IEA]; Any process by which an organism has an ef…	+	26870611-26870660	ILMN_1801257	GGCTGGGCATTTCCATCATATAGACCTCTGCCCTTCAGAGTAGCCTCACC	1002	S	2600392	NP_001035891.1	NM_001042426.1	NM_001809.2	RefSeq	NM_001042426.1	Homo sapiens	CENPA	CENP-A	CENPA	ILMN_180589
0.648931	NM_018944.2	160593	21	21q22.11b	"Homo sapiens chromosome 21 open reading frame 45 (C21orf45), mRNA."	54069	45827699	C21ORF45	B28; C21orf46; MIS18alpha; FASP1				-	33641191-33641240	ILMN_1712386	ATTAGCCAGGCATGCGAAACGCTGAGGTGGGAGGATCAGATGAGCTTGGG	860	S	160593	NP_061817.1	NM_018944.2	NM_018944.2	RefSeq	NM_018944.2	Homo sapiens	C21orf45	B28; C21orf46; MIS18alpha; FASP1	C21ORF45	ILMN_22929
0.649135	NM_138779.2	1850068	13	13q33.1b	"Homo sapiens chromosome 13 open reading frame 27 (C13orf27), mRNA."	93081	34222136	C13ORF27					-	102216833-102216882	ILMN_1682774	CACTGGATTGAGAAGGCAAATCATTCCATGGCAGTGAAAGGACGGTCGAC	724	S	1850068	NP_620134.2	NM_138779.2	NM_138779.2	RefSeq	NM_138779.2	Homo sapiens	C13orf27		C13ORF27	ILMN_8559
0.649863	NM_057735.1	4760154	8	8q22.1c	"Homo sapiens cyclin E2 (CCNE2), transcript variant 2, mRNA."	9134	17318562	CCNE2	CYCE2	"A membrane-bounded organelle of eukaryotic cells in which chromosomes are housed and replicated. In most cells, the nucleus contains all of the cell's chromosomes except the organellar chromosomes, and is the site of RNA synthesis and processing. In some species, or in specialized cell types, RNA metabolism or DNA replication may be absent [goid 5634] [evidence IEA]; That part of the nuclear con…	"Interacting selectively with any protein or protein complex (a complex of two or more proteins that may include other nonprotein molecules) [goid 5515] [pmid 9840943] [evidence IPI]; Interacting selectively with any protein or protein complex (a complex of two or more proteins that may include other nonprotein molecules) [goid 5515] [pmid 15232106] [evidence IPI]; Modulates the activity of a cyc…	"A point in the eukaryotic cell cycle where progress through the cycle can be halted until conditions are suitable for the cell to proceed to the next stage [goid 75] [pmid 9858585] [evidence TAS]; Any process that modulates the frequency, rate or extent of CDK activity [goid 79] [pmid 9840943] [evidence TAS]; The progression of biochemical and morphological phases and events that occur in a cell…	-	95962279-95962328	ILMN_2412384	GCTGTGGCTCCTTCCTAACTGGGGCTTTCTTGACATGTAGGTTGCTTGGT	1893	A	4760154	NP_477083.1	NM_057735.1	NM_057735.1	RefSeq	NM_057735.1	Homo sapiens	CCNE2	CYCE2	CCNE2	ILMN_27299
0.65029	NM_001130963.1	870767	12	12q13.3a-q13.3b	"Homo sapiens transmembrane protein 194A (TMEM194A), transcript variant 1, mRNA."	23306	195972880	TMEM194A		"Double layer of lipid molecules that encloses all cells, and, in eukaryotes, many organelles; may be a single or double lipid bilayer; also includes associated proteins [goid 16020] [evidence IEA]; Penetrating at least one phospholipid bilayer of a membrane. May also refer to the state of being buried in the bilayer with no exposure outside the bilayer. When used to describe a protein, indicates…	"Elemental activities, such as catalysis or binding, describing the actions of a gene product at the molecular level. A given gene product may exhibit one or more molecular functions [goid 3674] [evidence ND ]"	"Any process specifically pertinent to the functioning of integrated living units: cells, tissues, organs, and organisms. A process is a collection of molecular events with a defined beginning and end [goid 8150] [evidence ND ]"	-	57449965-57450014	ILMN_3306440	CTTGAAAAGGATGTTGGTGCCTTATGTGACACGAGCCAGAGCCTGCTGGG	5028	M	870767	NP_001124435.1	NM_001130963.1	NM_001130963.1	RefSeq	NM_001130963.1	Homo sapiens	TMEM194A		TMEM194A	ILMN_366734
0.650291	NM_003249.3	770672	19	19p13.3g-p13.3f	"Homo sapiens thimet oligopeptidase 1 (THOP1), mRNA."	7064	34222291	THOP1	MEPD_HUMAN; MP78; EP24.15	"All of the contents of a cell excluding the plasma membrane and nucleus, but including other subcellular structures [goid 5737] [evidence IEA]"	"Catalysis of the hydrolysis of internal, alpha-peptide bonds in a polypeptide chain by a mechanism in which water acts as a nucleophile, one or two metal ions hold the water molecule in place, and charged amino acid side chains are ligands for the metal ions [goid 4222] [evidence IEA]; Catalysis of the hydrolysis of a peptide bond. A peptide bond is a covalent bond formed when the carbon atom fr…	"The hydrolysis of a peptide bond or bonds within a protein [goid 6508] [evidence IEA]; The chemical reactions and pathways involving peptides, compounds of two or more amino acids where the alpha carboxyl group of one is bound to the alpha amino group of another [goid 6518] [evidence IEA]; A series of reactions, mediated by protein kinases, which occurs as a result of a single trigger reaction o…	+	2764369-2764418	ILMN_1726659	CTGGGACTGGCAGGGTGGCTGAGCGGCTGTCTTGCCTCTTGTCATTGTCT	2320	S	770672	NP_003240.1	NM_003249.3	NM_003249.3	RefSeq	NM_003249.3	Homo sapiens	THOP1	MEPD_HUMAN; MP78; EP24.15	THOP1	ILMN_21418
0.650343	NM_018451.3	460561	13	13q12.12b	"Homo sapiens centromere protein J (CENPJ), mRNA."	55835	130980074	CENPJ	MGC131581; LAP; LIP1; MCPH6; BM032; MGC131582; CPAP; CEMPJ	"All of the contents of a cell excluding the plasma membrane and nucleus, but including other subcellular structures [goid 5737] [evidence IEA]; A structure comprised of a core structure (in most organisms, a pair of centrioles) and peripheral material from which a microtubule-based structure, such as a spindle apparatus, is organized. Centrosomes occur close to the nucleus during interphase in m…	"Interacting selectively with monomeric or multimeric forms of tubulin, including microtubules [goid 15631] [pmid 15047868] [evidence IDA]; Interacting selectively with a specific domain of a protein [goid 19904] [pmid 11984006] [evidence IPI]"	"The 'de novo' formation of a microtubule, in which tubulin heterodimers form metastable oligomeric aggregates, some of which go on to support formation of a complete microtubule. Microtubule nucleation usually occurs from a specific site within a cell [goid 7020] [pmid 11003675] [evidence TAS]; The addition of tubulin heterodimers to one or both ends of a microtubule [goid 46785] [pmid 15047868]…	-	25457427-25457476	ILMN_1661776	TGGCCAAAGAGAACTACATACTGCCCAGTTCAAGAGACGGGAATACCCAG	4108	S	460561	NP_060921.3	NM_018451.3	NM_018451.2	RefSeq	NM_018451.3	Homo sapiens	CENPJ	MGC131581; LAP; LIP1; MCPH6; BM032; MGC142222; MGC131582; CPAP; MGC142224	CENPJ	ILMN_11774
0.650559	NM_015257.1	1110494	12	12q13.3a-q13.3b	"Homo sapiens transmembrane protein 194 (TMEM194), mRNA."	23306	58037092	TMEM194	KIAA0286; DKFZp686N1768				-	55736162-55736211	ILMN_2131336	GCCAACACCAACTCGTAGCTTTAGTGGCAGATGGGAGTGGTCACAGACTC	4851	S	1110494	NP_056072.1	NM_015257.1	NM_015257.1	RefSeq	NM_015257.1	Homo sapiens	TMEM194	KIAA0286; DKFZp686N1768	TMEM194	ILMN_7574
0.65057	NM_005480.2	4760646	12	12q13.12b	"Homo sapiens trophinin associated protein (tastin) (TROAP), mRNA."	10024	33438581	TROAP	TASTIN	"All of the contents of a cell excluding the plasma membrane and nucleus, but including other subcellular structures [goid 5737] [pmid 7758945] [evidence TAS]"	Interacting selectively with any protein or protein complex (a complex of two or more proteins that may include other nonprotein molecules) [goid 5515] [evidence IEA]	"The attachment of a cell, either to another cell or to an underlying substrate such as the extracellular matrix, via cell adhesion molecules [goid 7155] [pmid 7758945] [evidence TAS]"	+	48011638-48011667:48011668-48011687	ILMN_1700337	CGAATGGCAGGATGCCCTGTGTTTCATTCCAGTTGGTTCTGCTGCCCCCC	2384	S	4760646	NP_005471.2	NM_005480.2	NM_005480.2	RefSeq	NM_005480.2	Homo sapiens	TROAP	TASTIN	TROAP	ILMN_13141
0.650591	NM_024065.3	3870646	2	2q11.2d	"Homo sapiens phosducin-like 3 (PDCL3), mRNA."	79031	51944951	PDCL3	VIAF1; HTPHLP; MGC3062	"All of the contents of a cell excluding the plasma membrane and nucleus, but including other subcellular structures [goid 5737] [pmid 15371430] [evidence IDA]"	Interacting selectively with any protein or protein complex (a complex of two or more proteins that may include other nonprotein molecules) [goid 5515] [pmid 15371430] [evidence IPI]	"A form of programmed cell death induced by external or internal signals that trigger the activity of proteolytic caspases, whose actions dismantle the cell and result in cell death. Apoptosis begins internally with condensation and subsequent fragmentation of the cell nucleus (blebbing) while the plasma membrane remains intact. Other characteristics of apoptosis include DNA fragmentation and the…	+	100559358-100559390:100559391-100559407	ILMN_1702806	ATGAAGAGGGACAGCGATTCCGAGGGTGACTGAGGCTACAGCTTCTATCA	791	S	3870646	NP_076970.1	NM_024065.3	NM_024065.3	RefSeq	NM_024065.3	Homo sapiens	PDCL3	VIAF1; HTPHLP; MGC3062	PDCL3	ILMN_30010
0.650715	NM_003362.2	3610750	12	12q24.11a	"Homo sapiens uracil-DNA glycosylase (UNG), nuclear gene encoding mitochondrial protein, transcript variant 1, mRNA."	7374	19718744	UNG	UDG; DKFZp781L1143; UNG15; HIGM4; UNG1; UNG2; DGU	"A membrane-bounded organelle of eukaryotic cells in which chromosomes are housed and replicated. In most cells, the nucleus contains all of the cell's chromosomes except the organellar chromosomes, and is the site of RNA synthesis and processing. In some species, or in specialized cell types, RNA metabolism or DNA replication may be absent [goid 5634] [pmid 9016624] [evidence NAS]; A semiautonom…	"Catalysis of the cleavage of the N-C1' glycosidic bond between the damaged DNA base and the deoxyribose sugar, releasing a free base and leaving an apyrimidinic (AP) site. Enzymes with this activity recognize and remove uracil bases in DNA that result from the deamination of cytosine or the misincorporation of dUTP opposite an adenine [goid 4844] [pmid 9016624] [evidence NAS]; Interacting select…	"In base excision repair, an altered base is removed by a DNA glycosylase enzyme, followed by excision of the resulting sugar phosphate. The small gap left in the DNA helix is filled in by the sequential action of DNA polymerase and DNA ligase [goid 6284] [pmid 10805771] [evidence TAS]; The chemical reactions and pathways, including anabolism and catabolism, by which living organisms transform ch…	+	108032880-108032929	ILMN_1683120	TTCTCCTAGGGTTATGTCCAGTTGGGGTTTTTAAGGCAGCACAGACTGCC	1763	A	3610750	NP_003353.1	NM_003362.2	NM_080911.1	RefSeq	NM_003362.2	Homo sapiens	UNG	UDG; UNG1; DKFZp781L1143; UNG15; HIGM4; DGU	UNG	ILMN_21638
0.650873	NM_003594.3	2190220	1	1p13.1a	"Homo sapiens transcription termination factor, RNA polymerase II (TTF2), mRNA."	8458	40807470	TTF2	HuF2	"A membrane-bounded organelle of eukaryotic cells in which chromosomes are housed and replicated. In most cells, the nucleus contains all of the cell's chromosomes except the organellar chromosomes, and is the site of RNA synthesis and processing. In some species, or in specialized cell types, RNA metabolism or DNA replication may be absent [goid 5634] [evidence IEA]; A ribonucleoprotein complex,…	"Interacting selectively with a nucleotide, any compound consisting of a nucleoside that is esterified with (ortho)phosphate or an oligophosphate at any hydroxyl group on the ribose or deoxyribose moiety [goid 166] [evidence IEA]; Interacting selectively with DNA (deoxyribonucleic acid) [goid 3677] [evidence IEA]; Any activity that brings about termination of transcription by RNA polymerase II [g…	"The synthesis of either RNA on a template of DNA or DNA on a template of RNA [goid 6350] [evidence IEA]; The process by which transcription is completed; the formation of phosphodiester bonds ceases, the RNA-DNA hybrid dissociates, and RNA polymerase releases the DNA [goid 6353] [pmid 9748214] [evidence TAS]; Any process that modulates the frequency, rate or extent of DNA-dependent transcription…	+	117446481-117446530	ILMN_1810228	CAGCCATCTCTGCAGTTCTCTCAGTGCAGGCAGTTCTTCCTCTCAGGCTG	4321	S	2190220	NP_003585.3	NM_003594.3	NM_003594.3	RefSeq	NM_003594.3	Homo sapiens	TTF2	HuF2	TTF2	ILMN_7413
0.651442	NM_018283.1	3450370	13	13q14.2b	"Homo sapiens nudix (nucleoside diphosphate linked moiety X)-type motif 15 (NUDT15), mRNA."	55270	8922791	NUDT15	RP11-90M2.1; MTH2; FLJ10956; MGC104352		"Interacting selectively with magnesium (Mg) ions [goid 287] [evidence IEA]; Catalysis of the hydrolysis of various bonds, e.g. C-O, C-N, C-C, phosphoric anhydride bonds, etc. Hydrolase is the systematic name for any enzyme of EC class 3 [goid 16787] [evidence IEA]; Interacting selectively with manganese (Mn) ions [goid 30145] [evidence IEA]"		+	47519105-47519154	ILMN_2172202	AGGCTGAATGCAAAAGCAGATACAAGATTCCAGCTTTCGTCTGTCATCAG	1844	S	3450370	NP_060753.1	NM_018283.1	NM_018283.1	RefSeq	NM_018283.1	Homo sapiens	NUDT15	RP11-90M2.1; MTH2; FLJ10956; MGC104352	NUDT15	ILMN_9527
0.652128	NM_022490.1	4040504	9	9p13.2a	"Homo sapiens polymerase (RNA) I polypeptide E, 53kDa (POLR1E), mRNA."	64425	11968046	POLR1E	FLJ13390; FLJ13970; RP11-405L18.3; PRAF1; PAF53	"A membrane-bounded organelle of eukaryotic cells in which chromosomes are housed and replicated. In most cells, the nucleus contains all of the cell's chromosomes except the organellar chromosomes, and is the site of RNA synthesis and processing. In some species, or in specialized cell types, RNA metabolism or DNA replication may be absent [goid 5634] [evidence IEA]; A small, dense body one or m…	"Interacting selectively with DNA (deoxyribonucleic acid) [goid 3677] [evidence IEA]; Catalysis of the reaction: nucleoside triphosphate + RNA(n) = diphosphate + RNA(n+1). Utilizes a DNA template, i.e. the catalysis of DNA-template-directed extension of the 3'-end of an RNA strand by one nucleotide at a time. Can initiate a chain 'de novo' [goid 3899] [evidence IEA]; Interacting selectively with …	"The synthesis of either RNA on a template of DNA or DNA on a template of RNA [goid 6350] [evidence IEA]; The synthesis of ribosomal RNA (rRNA), any RNA that forms part of the ribosomal structure, from a DNA template [goid 9303] [evidence ISS]"	+	37493099-37493148	ILMN_2110167	GCCTTGCTTTAGCACAGGTATGAAGCCAGAAGCCAGCATCTCAACTGTGC	1762	S	4040504	NP_071935.1	NM_022490.1	NM_022490.1	RefSeq	NM_022490.1	Homo sapiens	POLR1E	FLJ13390; FLJ13970; RP11-405L18.3; PRAF1; PAF53	POLR1E	ILMN_2978
0.65237	NM_003318.3	5870725	6	6q14.1d	"Homo sapiens TTK protein kinase (TTK), mRNA."	7272	34303964	TTK	PYT; MPS1L1; FLJ38280; ESK	The array of microtubules and associated molecules that forms between opposite poles of a eukaryotic cell during mitosis or meiosis and serves to move the duplicated chromosomes apart [goid 5819] [pmid 10366450] [evidence TAS]	"Catalysis of the transfer of a phosphate group, usually from ATP, to a substrate molecule [goid 16301] [evidence IEA]; Interacting selectively with a nucleotide, any compound consisting of a nucleoside that is esterified with (ortho)phosphate or an oligophosphate at any hydroxyl group on the ribose or deoxyribose moiety [goid 166] [evidence IEA]; Catalysis of the reaction: ATP + a protein serine…	"The process of introducing a phosphate group on to a protein [goid 6468] [evidence IEA]; A process that is carried out at the cellular level which results in the formation, arrangement of constituent parts, or disassembly of the microtubule spindle during a mitotic cell cycle [goid 7052] [pmid 7737118] [evidence TAS]; A signal transduction based surveillance mechanism that ensures the fidelity o…	+	80807086-80807135	ILMN_1788166	CTGGGCCAACTTGTTGGTCTGAATTCTCCTAACTCCATTTTGAAAGCTGC	2511	S	5870725	NP_003309.2	NM_003318.3	NM_003318.3	RefSeq	NM_003318.3	Homo sapiens	TTK	PYT; MPS1L1; FLJ38280; ESK	TTK	ILMN_24472
0.653136	NM_005980.2	1510424	4	4p16.1f	"Homo sapiens S100 calcium binding protein P (S100P), mRNA."	6286	45827727	S100P	MIG9	"A membrane-bounded organelle of eukaryotic cells in which chromosomes are housed and replicated. In most cells, the nucleus contains all of the cell's chromosomes except the organellar chromosomes, and is the site of RNA synthesis and processing. In some species, or in specialized cell types, RNA metabolism or DNA replication may be absent [goid 5634] [pmid 15632002] [evidence IDA]; All of the c…	"Interacting selectively with magnesium (Mg) ions [goid 287] [pmid 15632002] [evidence TAS]; Interacting selectively with calcium ions (Ca2+) [goid 5509] [pmid 1633809] [evidence TAS]; Interacting selectively with any protein or protein complex (a complex of two or more proteins that may include other nonprotein molecules), in the presence of calcium [goid 48306] [pmid 15632002] [evidence IPI]"	The orderly movement of endothelial cells into the extracellular matrix to form an endothelium [goid 43542] [pmid 15313892] [evidence IMP]	+	6698765-6698769:6698770-6698814	ILMN_1801216	AATGATGCCCTGGAGATGTCACAGATTCCTGGCAGAGCCATGGTCCCAGG	378	S	1510424	NP_005971.1	NM_005980.2	NM_005980.2	RefSeq	NM_005980.2	Homo sapiens	S100P	MIG9	S100P	ILMN_23476
0.653363	NM_003035.2	6220050	1	1p33d	"Homo sapiens SCL/TAL1 interrupting locus (STIL), transcript variant 2, mRNA."	6491	115298660	STIL	SIL; DKFZp686O09161	"All of the contents of a cell excluding the plasma membrane and nucleus, but including other subcellular structures [goid 5737] [evidence IEA]"		"The biological process whose specific outcome is the progression of a multicellular organism over time from an initial condition (e.g. a zygote or a young adult) to a later condition (e.g. a multicellular animal or an aged adult) [goid 7275] [evidence IEA]; The multiplication or reproduction of cells, resulting in the expansion of a cell population [goid 8283] [pmid 8825637] [evidence TAS]"	-	47715945-47715994	ILMN_2413650	CTCGAGATACAGCTTTTTGCAGTATGGTGGGTTGGTTTTGGTGTAACATC	4832	A	6220050	NP_003026.2	NM_003035.2	NM_003035.2	RefSeq	NM_003035.2	Homo sapiens	STIL	SIL; DKFZp686O09161	STIL	ILMN_170609
0.653371	NR_003672.2	6760021	9		"Homo sapiens small nucleolar RNA host gene 7 (non-protein coding) (SNHG7), transcript variant 1, non-coding RNA."	84973	215422346	SNHG7					-	139621498-139621538:139622333-139622341	ILMN_3227023	GGGAAGCCTGGACGTCTGCTCACTGGAGATGACACGTGCGTGGGGTGTTG	295	A	6760021		NR_003672.2	NR_003672.2	RefSeq	NR_003672.2	Homo sapiens	SNHG7		SNHG7	ILMN_371358
0.653457	NR_004380.1	6290091	17		"Homo sapiens small nucleolar RNA, C/D box 104 (SNORD104), small nucleolar RNA."	692227	161087000	SNORD104	U104				+	62223468-62223517	ILMN_3248218	ACGTGTTAGACTGCTGACGCGGGTGATGCGAACTGGAGTCTGAGCCTGCC	31	S	6290091		NR_004380.1	NR_004380.1	RefSeq	NR_004380.1	Homo sapiens	SNORD104	U104	SNORD104	ILMN_351608
0.653463	NM_001548.3	2000148	10	10q23.31b	"Homo sapiens interferon-induced protein with tetratricopeptide repeats 1 (IFIT1), transcript variant 2, mRNA."	3434	116534936	IFIT1	RNM561; IFI-56; IFI56; GARG-16; IFNAI1; G10P1	"All of the contents of a cell excluding the plasma membrane and nucleus, but including other subcellular structures [goid 5737] [pmid 3753936] [evidence NAS]"	"The selective, often stoichiometric, interaction of a molecule with one or more specific sites on another molecule [goid 5488] [evidence IEA]"	"Any process specifically pertinent to the functioning of integrated living units: cells, tissues, organs, and organisms. A process is a collection of molecular events with a defined beginning and end [goid 8150] [evidence ND ]"	+	91153370-91153419	ILMN_1707695	TGAATGAAGCCCTGGAGTACTATGAGCGGGCCCTGAGACTGGCTGCTGAC	1506	A	2000148	NP_001539.3	NM_001548.3	NM_001548.2	RefSeq	NM_001548.3	Homo sapiens	IFIT1	RNM561; IFI-56; IFI56; GARG-16; IFNAI1; G10P1; ISG56	IFIT1	ILMN_1751
0.653583	XR_042352.1	1850192	6	6p21.33a	"PREDICTED: Homo sapiens misc_RNA (LOC729816), miscRNA."	729816	169169534	LOC729816					-	31441802-31441851	ILMN_3232696	CCATCGCATATGGGACTCTTGCCAGTCCTTGACATTGTCGGGCTTTTCAA	961	I	1850192		XR_042352.1	XR_042352.1	RefSeq	XR_042352.1	Homo sapiens	LOC729816		LOC729816	ILMN_344322
0.654542	NM_032485.4	1190037	20	20p12.3c	"Homo sapiens minichromosome maintenance complex component 8 (MCM8), transcript variant 1, mRNA."	84515	33469925	MCM8	C20orf154; dJ967N21.5; MGC119522; MGC4816; MGC12866; REC; MGC119523	"A membrane-bounded organelle of eukaryotic cells in which chromosomes are housed and replicated. In most cells, the nucleus contains all of the cell's chromosomes except the organellar chromosomes, and is the site of RNA synthesis and processing. In some species, or in specialized cell types, RNA metabolism or DNA replication may be absent [goid 5634] [evidence IEA]; That part of the nuclear con…	"Interacting selectively with a nucleotide, any compound consisting of a nucleoside that is esterified with (ortho)phosphate or an oligophosphate at any hydroxyl group on the ribose or deoxyribose moiety [goid 166] [evidence IEA]; Interacting selectively with DNA (deoxyribonucleic acid) [goid 3677] [evidence IEA]; Interacting selectively with ATP, adenosine 5'-triphosphate, a universally importan…	"The process whereby new strands of DNA are synthesized. The template for replication can either be an existing DNA molecule or RNA [goid 6260] [evidence IEA]; The process whereby new strands of DNA are synthesized. The template for replication can either be an existing DNA molecule or RNA [goid 6260] [pmid 12791985] [evidence EXP]; The synthesis of either RNA on a template of DNA or DNA on a tem…	+	5923018-5923037:5923038-5923067	ILMN_2407124	ACCAGCTTCAAACTATGTAAAAGGACTTCACCAAGTTAGGGCCTCCTGGG	2881	A	1190037	NP_115874.3	NM_032485.4	NM_032485.4	RefSeq	NM_032485.4	Homo sapiens	MCM8	C20orf154; dJ967N21.5; MGC119522; MGC4816; MGC12866; REC; MGC119523	MCM8	ILMN_11171
0.654545	NM_032620.1	2710431	19	19p13.11e	"Homo sapiens GTP binding protein 3 (mitochondrial) (GTPBP3), nuclear gene encoding mitochondrial protein, transcript variant V, mRNA."	84705	14249125	GTPBP3	FLJ14700; GTPBG3; MTGP1; MSS1; THDF1	"The living contents of a cell; the matter contained within (but not including) the plasma membrane, usually taken to exclude large vacuoles and masses of secretory or ingested material. In eukaryotes it includes the nucleus and cytoplasm [goid 5622] [evidence IEA]; A membrane-bounded organelle of eukaryotic cells in which chromosomes are housed and replicated. In most cells, the nucleus contains…	"Interacting selectively with a nucleotide, any compound consisting of a nucleoside that is esterified with (ortho)phosphate or an oligophosphate at any hydroxyl group on the ribose or deoxyribose moiety [goid 166] [evidence IEA]; Catalysis of the reaction: GTP + H2O = GDP + phosphate [goid 3924] [evidence IEA]; Interacting selectively with GTP, guanosine triphosphate [goid 5525] [evidence IEA]; …	The covalent alteration of one or more nucleotides within a tRNA molecule to produce a tRNA molecule with a sequence that differs from that coded genetically [goid 6400] [evidence IEA]	+	17314411-17314460	ILMN_1748894	CCTTAGCCCTTCTGTGGTTGTCATGGCTTAATGTGTGTCTTTCCAGAACT	2420	I	2710431	NP_116009.1	NM_032620.1	NM_032620.1	RefSeq	NM_032620.1	Homo sapiens	GTPBP3	MTGP1; MSS1; FLJ14700; THDF1; GTPBG3	GTPBP3	ILMN_13264
0.655121	NM_001826.1	4210088	1	1q21.3e	"Homo sapiens CDC28 protein kinase regulatory subunit 1B (CKS1B), mRNA."	1163	4502856	CKS1B	PNAS-18; PNAS-16; ckshs1; CKS1	That part of the nuclear content other than the chromosomes or the nucleolus [goid 5654] [pmid 11231585] [evidence EXP]	"Catalysis of the transfer of a phosphate group, usually from ATP, to a substrate molecule [goid 16301] [evidence IEA]; Modulates the activity of a cyclin-dependent protein kinase, enzymes of the protein kinase family that are regulated through association with cyclins and other proteins [goid 16538] [evidence IEA]; Catalysis of the transfer of a phosphate group, usually from ATP, to a substrate …	"The progression of biochemical and morphological phases and events that occur in a cell during successive cell replication or nuclear replication events. Canonically, the cell cycle comprises the replication and segregation of genetic material followed by the division of the cell, but in endocycles or syncytial cells nuclear replication or nuclear division may not be followed by cell division [g…	+	153217209-153217214:153217825-153217868	ILMN_1719256	GAACCAGAACCTCACATCTTGCTGTTCCGGCGCCCACTACCCAAGAAACC	190	S	4210088	NP_001817.1	NM_001826.1	NM_001826.1	RefSeq	NM_001826.1	Homo sapiens	CKS1B	PNAS-18; PNAS-16; ckshs1; CKS1	CKS1B	ILMN_11313
0.655309	NM_004470.2	7160491	11	11q13.1a-q13.1b	"Homo sapiens FK506 binding protein 2, 13kDa (FKBP2), transcript variant 1, mRNA."	2286	17149841	FKBP2	PPIase; FKBP-13	"The irregular network of unit membranes, visible only by electron microscopy, that occurs in the cytoplasm of many eukaryotic cells. The membranes form a complex meshwork of tubular channels, which are often expanded into slitlike cavities called cisternae. The ER takes two forms, rough (or granular), with ribosomes adhering to the outer surface, and smooth (with no ribosomes attached) [goid 578…	Catalysis of the reaction: peptidyl-proline (omega=180) = peptidyl-proline (omega=0) [goid 3755] [evidence IEA]; Interacting selectively with any protein or protein complex (a complex of two or more proteins that may include other nonprotein molecules) [goid 5515] [pmid 16713569] [evidence IPI]; Interacting selectively with the immunosuppressant FK506 [goid 5528] [pmid 1713687] [evidence TAS]; Ca…	The process of assisting in the covalent and noncovalent assembly of single chain polypeptides or multisubunit complexes into the correct tertiary structure [goid 6457] [evidence IEA]	+	63765036-63765085	ILMN_1807563	AAGACCCGTGCCAGCGGGCGTGTGGCCGCGGGTTTCGCACGGTCCAATAA	48	I	7160491	NP_004461.2	NM_004470.2	NM_004470.2	RefSeq	NM_004470.2	Homo sapiens	FKBP2	PPIase; FKBP-13	FKBP2	ILMN_17464
0.656801	NM_130851.1	990075	14	14q22.2b	"Homo sapiens bone morphogenetic protein 4 (BMP4), transcript variant 3, mRNA."	652	19528651	BMP4	BMP2B1; BMP2B; ZYME	"The space external to the outermost structure of a cell. For cells without external protective or external encapsulating structures this refers to space outside of the plasma membrane. This term covers the host cell environment outside an intracellular parasite [goid 5576] [evidence IEA]; A layer consisting mainly of proteins (especially collagen) and glycosaminoglycans (mostly as proteoglycans)…	"Mediates the transfer of a signal from the outside to the inside of a cell by means other than the introduction of the signal molecule itself into the cell [goid 4871] [pmid 9804553] [evidence TAS]; Functions to control the survival, growth, differentiation and effector function of tissues and cells [goid 5125] [pmid 14749725] [evidence IDA]; Interacting selectively with any protein or protein c…	"Blood vessel formation when new vessels emerge from the proliferation of pre-existing blood vessels [goid 1525] [evidence IEA]; Branching of the ureteric bud [goid 1658] [evidence IEA]; Any process that activates or increases the frequency, rate or extent of addition of phosphate groups to amino acids within a protein [goid 1934] [pmid 14749725] [evidence IDA]; The biological process whose speci…	-	53486474-53486499:53486500-53486523	ILMN_1740900	AGTAGAGGGATGTGGGTGCCGCTGAGATCAGGCAGTCCTTGAGGATAGAC	1460	A	990075	NP_570912.1	NM_130851.1	NM_001202.2	RefSeq	NM_130851.1	Homo sapiens	BMP4	BMP2B1; BMP2B; ZYME	BMP4	ILMN_6177
0.656905	XR_038380.1	1510180		4q31.21b	"PREDICTED: Homo sapiens misc_RNA (LOC100130178), miscRNA."	100130178	169167138	LOC100130178							ILMN_3181695	ACGCGCATTATCCAGGGAGATGGTGTTGTCCTGGTTGTCCCTCCACTGAA	354	A	1510180		XR_038380.1	XR_038380.1	RefSeq	XR_038380.1	Homo sapiens	LOC100130178		LOC100130178	ILMN_339397
0.657613	NM_021029.4	6860671		Xq22.1c	"Homo sapiens ribosomal protein L36a (RPL36A), mRNA."	6173	78190470	RPL36A	RPL44; MGC72020; MIG6; L44L	"The living contents of a cell; the matter contained within (but not including) the plasma membrane, usually taken to exclude large vacuoles and masses of secretory or ingested material. In eukaryotes it includes the nucleus and cytoplasm [goid 5622] [evidence IEA]; An intracellular organelle, about 200 A in diameter, consisting of RNA and protein. It is the site of protein biosynthesis resulting…	"The action of a molecule that contributes to the structural integrity of the ribosome [goid 3735] [evidence IEA]; Elemental activities, such as catalysis or binding, describing the actions of a gene product at the molecular level. A given gene product may exhibit one or more molecular functions [goid 3674] [evidence ND ]; The action of a molecule that contributes to the structural integrity of t…	"The chemical reactions and pathways resulting in the formation of a protein. This is a ribosome-mediated process in which the information in messenger RNA (mRNA) is used to specify the sequence of amino acids in the protein [goid 6412] [evidence IEA]; The successive addition of amino acid residues to a nascent polypeptide chain during protein biosynthesis [goid 6414] [pmid 15189156] [evidence EX…	+	100532604-100532653	ILMN_2112811	GAGGAAGTGCGATCGGGAACCTCCTATATACTTCCGTTTGCCTCGCGGTT	1	S	6860671	NP_066357.1	NM_021029.4	NM_021029.4	RefSeq	NM_021029.4	Homo sapiens	RPL36A	RPL44; MGC72020; MIG6; L44L	RPL36A	ILMN_11108
0.657624	NM_014042.1	6840100	11	11q13.4a	"Homo sapiens chromosome 11 open reading frame 51 (C11orf51), mRNA."	25906	7661621	C11ORF51	DKFZP564M082; HSPC020	"The living contents of a cell; the matter contained within (but not including) the plasma membrane, usually taken to exclude large vacuoles and masses of secretory or ingested material. In eukaryotes it includes the nucleus and cytoplasm [goid 5622] [pmid 11256614] [evidence IDA]"			-	71499252-71499297:71499851-71499854	ILMN_1726104	CCTGGCTCCAAAGCATCGCGGAGAAAGACAACAACCTGGTTCCTATTGGC	342	S	6840100	NP_054761.1	NM_014042.1	NM_014042.1	RefSeq	NM_014042.1	Homo sapiens	C11orf51	DKFZP564M082; HSPC020	C11ORF51	ILMN_3952
0.657752	NM_001038.4	7040487	12	12p13.31d	"Homo sapiens sodium channel, nonvoltage-gated 1 alpha (SCNN1A), mRNA."	6337	47834319	SCNN1A	SCNEA; FLJ21883; ENaCa; SCNN1; ENaCalpha	"The membrane surrounding a cell that separates the cell from its external environment. It consists of a phospholipid bilayer and associated proteins [goid 5886] [evidence IEA]; Penetrating at least one phospholipid bilayer of a membrane. May also refer to the state of being buried in the bilayer with no exposure outside the bilayer. When used to describe a protein, indicates that all or part of …	Catalysis of facilitated diffusion of an ion (by an energy-independent process) by passage through a transmembrane aqueous pore or channel without evidence for a carrier-mediated mechanism [goid 5216] [evidence IEA]; Interacting selectively with any protein or protein complex (a complex of two or more proteins that may include other nonprotein molecules) [goid 5515] [pmid 11244092] [evidence IPI]…	"The directed movement of charged atoms or small charged molecules into, out of, within or between cells [goid 6811] [evidence IEA]; The directed movement of sodium ions (Na+) into, out of, within or between cells [goid 6814] [evidence IEA]; The directed movement of sodium ions (Na+) into, out of, within or between cells [goid 6814] [pmid 8589714] [evidence TAS]; The directed movement of sodium i…	-	6326327-6326376	ILMN_1713995	GCGGTCAGGGACTGAATCTTGCCCGTTTATGTATGCTCCATGTCTAGCCC	3032	S	7040487	NP_001029.1	NM_001038.4	NM_001038.4	RefSeq	NM_001038.4	Homo sapiens	SCNN1A	SCNEA; FLJ21883; ENaCa; SCNN1; ENaCalpha	SCNN1A	ILMN_5697
0.657958	NM_031453.2	6040603	10	10p13c	"Homo sapiens family with sequence similarity 107, member B (FAM107B), mRNA."	83641	40254981	FAM107B	FLJ45505; C10orf45; MGC11034; MGC90261				-	14601899-14601948	ILMN_1758672	GGGGCCCTGGTAGGCTCCTTTAGAAGGACCATTTCTGTTCCTAGAGCTTA	3104	S	6040603	NP_113641.2	NM_031453.2	NM_031453.2	RefSeq	NM_031453.2	Homo sapiens	FAM107B	FLJ45505; C10orf45; MGC11034; MGC90261	FAM107B	ILMN_2236
0.658182	NM_012177.2	4010097	6	6q25.2a	"Homo sapiens F-box protein 5 (FBXO5), mRNA."	26271	15812190	FBXO5	Fbxo31; FBX5; EMI1	"A membrane-bounded organelle of eukaryotic cells in which chromosomes are housed and replicated. In most cells, the nucleus contains all of the cell's chromosomes except the organellar chromosomes, and is the site of RNA synthesis and processing. In some species, or in specialized cell types, RNA metabolism or DNA replication may be absent [goid 5634] [pmid 11988738] [evidence IDA]; That part of…	Interacting selectively with any protein or protein complex (a complex of two or more proteins that may include other nonprotein molecules) [goid 5515] [pmid 11988738] [evidence IPI]; Interacting selectively with any protein or protein complex (a complex of two or more proteins that may include other nonprotein molecules) [goid 5515] [pmid 12791267] [evidence IPI]; Interacting selectively with zi…	"The chemical reactions and pathways resulting in the breakdown of a protein or peptide by hydrolysis of its peptide bonds, initiated by the covalent attachment of a ubiquitin moiety, or multiple ubiquitin moieties, to the protein [goid 6511] [evidence IEA]; The progression of biochemical and morphological phases and events that occur in a cell during successive cell replication or nuclear replic…	-	153334023-153334072	ILMN_1710676	GATGGCAAGCTCCTCAAAGCCAGTTGTAAAATAGGTCCCCTGCCTGGTAC	1342	S	4010097	NP_036309.1	NM_012177.2	NM_012177.2	RefSeq	NM_012177.2	Homo sapiens	FBXO5	Fbxo31; FBX5; EMI1	FBXO5	ILMN_9763
0.659386	NM_032440.1	7150554	10	10q24.1a-q24.1b	"Homo sapiens ligand dependent nuclear receptor corepressor (LCOR), mRNA."	84458	39930472	LCOR	FLJ38026; MLR2; KIAA1795; RP11-175O19.1	"A membrane-bounded organelle of eukaryotic cells in which chromosomes are housed and replicated. In most cells, the nucleus contains all of the cell's chromosomes except the organellar chromosomes, and is the site of RNA synthesis and processing. In some species, or in specialized cell types, RNA metabolism or DNA replication may be absent [goid 5634] [evidence IEA]"	"The function of binding to a specific DNA sequence in order to modulate transcription. The transcription factor may or may not also interact selectively with a protein or macromolecular complex [goid 3700] [evidence IEA]; Functions to initiate or regulate RNA polymerase II transcription [goid 3702] [evidence IEA]; Interacting selectively with a transcription factor, any protein required to initi…	"Any process that stops, prevents or reduces the frequency, rate or extent of transcription from an RNA polymerase II promoter [goid 122] [evidence IEA]; The synthesis of either RNA on a template of DNA or DNA on a template of RNA [goid 6350] [evidence IEA]; Any process that modulates the frequency, rate or extent of DNA-dependent transcription [goid 6355] [evidence IEA]"	+	98708585-98708634	ILMN_2062381	GTGAAGCATGGTTGAAATTAGCTAGTGGTCCCTTTTGAATTTCATGAGCC	4764	S	7150554	NP_115816.1	NM_032440.1	NM_032440.1	RefSeq	NM_032440.1	Homo sapiens	LCOR	FLJ38026; MLR2; KIAA1795; RP11-175O19.1	LCOR	ILMN_173510
0.659549	NM_005101.1	2100196	1	1p36.33b	"Homo sapiens ISG15 ubiquitin-like modifier (ISG15), mRNA."	9636	4826773	ISG15	G1P2; UCRP; IFI15	"The space external to the outermost structure of a cell. For cells without external protective or external encapsulating structures this refers to space outside of the plasma membrane. This term covers the host cell environment outside an intracellular parasite [goid 5576] [evidence IEA]; That part of a multicellular organism outside the cells proper, usually taken to be outside the plasma membr…	"Interacting selectively with any protein or protein complex (a complex of two or more proteins that may include other nonprotein molecules) [goid 5515] [evidence NAS]; Acting as an indicator or marker to facilitate recognition by other molecules in the cell. Recognition of the tag, which can be covalently attached to the target molecule, may result in modification, sequestration, transport or de…	"The covalent alteration of one or more amino acids occurring in proteins, peptides and nascent polypeptides (co-translational, post-translational modifications). Includes the modification of charged tRNAs that are destined to occur in a protein (pre-translation modification) [goid 6464] [evidence IEA]; The chemical reactions and pathways resulting in the breakdown of a protein or peptide by hydr…	+	939540-939589	ILMN_2054019	ACCTGAAGCAGCAAGTGAGCGGGCTGGAGGGTGTGCAGGACGACCTGTTC	392	S	2100196	NP_005092.1	NM_005101.1	NM_005101.1	RefSeq	NM_005101.1	Homo sapiens	ISG15	G1P2; UCRP; IFI15	ISG15	ILMN_6174
0.659556	NM_016343.3	4780129	1	1q41a	"Homo sapiens centromere protein F, 350/400ka (mitosin) (CENPF), mRNA."	1063	55770833	CENPF	PRO1779; hcp-1; CENF	"The ordered and organized complex of DNA and protein that forms the chromosome [goid 785] [pmid 9891037] [evidence NAS]; Either of the ends of a spindle, where spindle microtubules are organized; usually contains a microtubule organizing center and accessory molecules, spindle microtubules and astral microtubules [goid 922] [pmid 7542657] [evidence IDA]; The region of a condensed chromosome kine…	"Interacting selectively with chromatin, the network of fibers of DNA and protein that make up the chromosomes of the eukaryotic nucleus during interphase [goid 3682] [pmid 9891037] [evidence NAS]; Interacting selectively with a protein C-terminus, the end of any peptide chain at which the 1-carboxy function of a constituent amino acid is not attached in peptide linkage to another amino-acid resi…	"Progression through G2 phase, one of two 'gap' phases in the mitotic cell cycle; G2 is the interval between the completion of DNA synthesis and the beginning of mitosis [goid 85] [pmid 12154071] [evidence IMP]; Progression through G2 phase, one of two 'gap' phases in the mitotic cell cycle; G2 is the interval between the completion of DNA synthesis and the beginning of mitosis [goid 85] [pmid 76…	+	212904364-212904413	ILMN_1664516	CCAGTGAGGGCTGCAGGCTTCCTAGAGGTGTGCTATACCATGCGTCTGTC	10123	S	4780129	NP_057427.3	NM_016343.3	NM_016343.3	RefSeq	NM_016343.3	Homo sapiens	CENPF	PRO1779; hcp-1; CENF	CENPF	ILMN_176772
0.659677	NM_006636.3	1300706	2	2p13.1b	"Homo sapiens methylenetetrahydrofolate dehydrogenase (NADP+ dependent) 2, methenyltetrahydrofolate cyclohydrolase (MTHFD2), nuclear gene encoding mitochondrial protein, transcript variant 1, mRNA."	10797	94721353	MTHFD2	NMDMC	"A semiautonomous, self replicating organelle that occurs in varying numbers, shapes, and sizes in the cytoplasm of virtually all eukaryotic cells. It is notably the site of tissue respiration [goid 5739] [evidence IEA]; A semiautonomous, self replicating organelle that occurs in varying numbers, shapes, and sizes in the cytoplasm of virtually all eukaryotic cells. It is notably the site of tissu…	"The selective, often stoichiometric, interaction of a molecule with one or more specific sites on another molecule [goid 5488] [evidence IEA]; Catalysis of the hydrolysis of various bonds, e.g. C-O, C-N, C-C, phosphoric anhydride bonds, etc. Hydrolase is the systematic name for any enzyme of EC class 3 [goid 16787] [evidence IEA]; Interacting selectively with magnesium (Mg) ions [goid 287] [pmid…	"The chemical reactions and pathways, including anabolism and catabolism, by which living organisms transform chemical substances. Metabolic processes typically transform small molecules, but also include macromolecular processes such as DNA repair and replication, and protein synthesis and degradation [goid 8152] [evidence IEA]; The chemical reactions and pathways resulting in the formation of f…	+	74295734-74295783	ILMN_1674706	GGGTAAGTACGCAACTTACTTTTCCACCAAAGAACTGTCAGCAGCTGCCT	1989	S	1300706	NP_006627.2	NM_006636.3	NM_006636.2	RefSeq	NM_006636.3	Homo sapiens	MTHFD2	NMDMC	MTHFD2	ILMN_23782
0.659937	NM_001025203.1	1450102	21	21q22.3c	"Homo sapiens U2 small nuclear RNA auxiliary factor 1 (U2AF1), transcript variant b, mRNA."	7307	68800127	U2AF1	DKFZp313J1712; U2AFBP; U2AF35; RN; RNU2AF1; FP793	"A membrane-bounded organelle of eukaryotic cells in which chromosomes are housed and replicated. In most cells, the nucleus contains all of the cell's chromosomes except the organellar chromosomes, and is the site of RNA synthesis and processing. In some species, or in specialized cell types, RNA metabolism or DNA replication may be absent [goid 5634] [evidence IEA]; A membrane-bounded organelle…	"Interacting selectively with a nucleotide, any compound consisting of a nucleoside that is esterified with (ortho)phosphate or an oligophosphate at any hydroxyl group on the ribose or deoxyribose moiety [goid 166] [evidence IEA]; Interacting selectively with an RNA molecule or a portion thereof [goid 3723] [evidence IEA]; Interacting selectively with zinc (Zn) ions [goid 8270] [evidence IEA]; In…	"The joining together of exons from one or more primary transcripts of nuclear messenger RNA (mRNA) and the excision of intron sequences, via a spliceosomal mechanism, so that mRNA consisting only of the joined exons is produced [goid 398] [pmid 9731529] [evidence IC ]; The joining together of exons from one or more primary transcripts of nuclear messenger RNA (mRNA) and the excision of intron se…	-	44513339-44513359:44514581-44514609	ILMN_1772113	GCGGGAGCTGTATGGCCGCCGTCGCAAGAAGCATAGATCAAGATCCCGAT	630	A	1450102	NP_001020374.1	NM_001025203.1	NM_001025204.1	RefSeq	NM_001025203.1	Homo sapiens	U2AF1	DKFZp313J1712; U2AFBP; U2AF35; RN; RNU2AF1; FP793	U2AF1	ILMN_12734
0.660375	NM_153682.2	5810630	21	21q22.13a	"Homo sapiens phosphatidylinositol glycan anchor biosynthesis, class P (PIGP), transcript variant 2, mRNA."	51227	82799479	PIGP	DCRC-S; DCRC; DSRC; PIGP; PIG-P	"Double layer of lipid molecules that encloses all cells, and, in eukaryotes, many organelles; may be a single or double lipid bilayer; also includes associated proteins [goid 16020] [evidence IEA]; Penetrating at least one phospholipid bilayer of a membrane. May also refer to the state of being buried in the bilayer with no exposure outside the bilayer. When used to describe a protein, indicates…	"Elemental activities, such as catalysis or binding, describing the actions of a gene product at the molecular level. A given gene product may exhibit one or more molecular functions [goid 3674] [evidence ND ]; Catalysis of the transfer of a glycosyl group from one compound (donor) to another (acceptor) [goid 16757] [evidence IEA]; Catalysis of the reaction: UDP-N-acetyl-D-glucosamine + phosphati…	"Any process specifically pertinent to the functioning of integrated living units: cells, tissues, organs, and organisms. A process is a collection of molecular events with a defined beginning and end [goid 8150] [evidence ND ]; The stepwise addition of the components of the GPI anchor on to phosphatidylinositol lipids in the endoplasmic reticulum membrane [goid 16254] [pmid 11102867] [evidence E…	-	38439573-38439622	ILMN_1764871	GCTCTTGTTTGGGATTAACATGATGAGTACCTCTCCACTCGACTCCATCC	394	A	5810630	NP_710149.1	NM_153682.2	NM_153681.1	RefSeq	NM_153682.2	Homo sapiens	PIGP	DCRC-S; DSCR5; DCRC; DSRC	PIGP	ILMN_18625
0.660827	NM_003068.3	6330730	8	8q11.21c	"Homo sapiens snail homolog 2 (Drosophila) (SNAI2), mRNA."	6591	24497625	SNAI2	WS2D; SLUG; SLUGH1; MGC10182	"The living contents of a cell; the matter contained within (but not including) the plasma membrane, usually taken to exclude large vacuoles and masses of secretory or ingested material. In eukaryotes it includes the nucleus and cytoplasm [goid 5622] [evidence IEA]; A membrane-bounded organelle of eukaryotic cells in which chromosomes are housed and replicated. In most cells, the nucleus contains…	Interacting selectively with DNA (deoxyribonucleic acid) [goid 3677] [evidence IEA]; Interacting selectively with zinc (Zn) ions [goid 8270] [evidence IEA]; Interacting selectively with any metal ion [goid 46872] [evidence IEA]	"Any process that stops, prevents or reduces the frequency, rate or extent of transcription from an RNA polymerase II promoter [goid 122] [pmid 10866665] [evidence TAS]; The synthesis of either RNA on a template of DNA or DNA on a template of RNA [goid 6350] [evidence IEA]; Any process that modulates the frequency, rate or extent of DNA-dependent transcription [goid 6355] [evidence IEA]; The biol…	-	49993471-49993520	ILMN_2082585	AGGATTTCCCATAGGAAGAGATCTGCCAGACGCGAACTCAGGTGCCTTAA	1369	S	6330730	NP_003059.1	NM_003068.3	NM_003068.3	RefSeq	NM_003068.3	Homo sapiens	SNAI2	WS2D; SLUG; SLUGH1; MGC10182	SNAI2	ILMN_165913
0.661303	NM_032593.2	1570370	9	9p13.3a	"Homo sapiens histidine triad nucleotide binding protein 2 (HINT2), mRNA."	84681	49574527	HINT2	HIT-17	"The space external to the outermost structure of a cell. For cells without external protective or external encapsulating structures this refers to space outside of the plasma membrane. This term covers the host cell environment outside an intracellular parasite [goid 5576] [evidence IEA]; A semiautonomous, self replicating organelle that occurs in varying numbers, shapes, and sizes in the cytopl…	"Catalysis of the hydrolysis of various bonds, e.g. C-O, C-N, C-C, phosphoric anhydride bonds, etc. Hydrolase is the systematic name for any enzyme of EC class 3 [goid 16787] [evidence IEA]"		-	35813139-35813142:35813263-35813308	ILMN_1697820	CAAGCAGACAGCAAAGGCTGAGGGCCTGGGAGATGGATACCGACTTGTGA	420	S	1570370	NP_115982.1	NM_032593.2	NM_032593.2	RefSeq	NM_032593.2	Homo sapiens	HINT2	HIT-17	HINT2	ILMN_20073
0.661523	NM_001467.4	5130577	11	11q23.3e	"Homo sapiens solute carrier family 37 (glucose-6-phosphate transporter), member 4 (SLC37A4), mRNA."	2542	116686112	SLC37A4	GSD1b; TRG19; MGC15729; G6PT1; PRO0685	"The irregular network of unit membranes, visible only by electron microscopy, that occurs in the cytoplasm of many eukaryotic cells. The membranes form a complex meshwork of tubular channels, which are often expanded into slitlike cavities called cisternae. The ER takes two forms, rough (or granular), with ribosomes adhering to the outer surface, and smooth (with no ribosomes attached) [goid 578…	"Enables the directed movement of substances (such as macromolecules, small molecules, ions) into, out of, within or between cells [goid 5215] [pmid 9428641] [evidence NAS]; Catalysis of the transfer of a solute or solutes from one side of a membrane to the other according to the reaction: sugar(out) + H+(out) = sugar(in) + H+(in) [goid 5351] [evidence IEA]; Catalysis of the transfer of a solute …	"The process of regulating the proliferation and elimination of neutrophils such that the total number of neutrophils within a whole or part of an organism is stable over time in the absence of an outside stimulus [goid 1780] [evidence IEA]; The appearance of a cytokine due to biosynthesis or secretion following a cellular stimulus, resulting in an increase in its intracellular or extracellular l…	-	118400362-118400411	ILMN_1678678	GACTGCTGTTGCCAATACCTCAGACTCCAGGGAAAGAGAGGAGGCCATCA	1936	S	5130577	NP_001458.1	NM_001467.4	NM_001467.3	RefSeq	NM_001467.4	Homo sapiens	SLC37A4	G6PT3; GSD1b; TRG19; G6PT2; GSD1d; GSD1c; MGC15729; G6PT1; PRO0685	SLC37A4	ILMN_24454
0.661642	NM_002692.2	1170326	14	14q22.1a	"Homo sapiens polymerase (DNA directed), epsilon 2 (p59 subunit) (POLE2), mRNA."	5427	32189368	POLE2	DPE2	"A membrane-bounded organelle of eukaryotic cells in which chromosomes are housed and replicated. In most cells, the nucleus contains all of the cell's chromosomes except the organellar chromosomes, and is the site of RNA synthesis and processing. In some species, or in specialized cell types, RNA metabolism or DNA replication may be absent [goid 5634] [evidence IEA]; That part of the nuclear con…	"Interacting selectively with DNA (deoxyribonucleic acid) [goid 3677] [evidence IEA]; Catalysis of the reaction: deoxynucleoside triphosphate + DNA(n) = diphosphate + DNA(n+1); the synthesis of DNA from deoxyribonucleotide triphosphates in the presence of a DNA template and primer [goid 3887] [pmid 9405441] [evidence TAS]; Catalysis of the transfer of a group, e.g. a methyl group, glycosyl group,…	"The process whereby new strands of DNA are synthesized. The template for replication can either be an existing DNA molecule or RNA [goid 6260] [pmid 9405441] [evidence TAS]; The process of restoring DNA after damage. Genomes are subject to damage by chemical and physical agents in the environment (e.g. UV and ionizing radiations, chemical mutagens, fungal and bacterial toxins, etc.) and by free …	-	50117090-50117139	ILMN_1774336	CCCAAGGACATCTGACTCCCCTACCTCTTTATGTCTGCCCAGTGTATTGG	1354	S	1170326	NP_002683.2	NM_002692.2	NM_002692.2	RefSeq	NM_002692.2	Homo sapiens	POLE2	DPE2	POLE2	ILMN_19705
0.661812	NM_016055.4	730139	11	11q13.4b	"Homo sapiens mitochondrial ribosomal protein L48 (MRPL48), nuclear gene encoding mitochondrial protein, mRNA."	51642	71852587	MRPL48	CGI-118; MGC13323	"The living contents of a cell; the matter contained within (but not including) the plasma membrane, usually taken to exclude large vacuoles and masses of secretory or ingested material. In eukaryotes it includes the nucleus and cytoplasm [goid 5622] [evidence IEA]; A semiautonomous, self replicating organelle that occurs in varying numbers, shapes, and sizes in the cytoplasm of virtually all euk…	The action of a molecule that contributes to the structural integrity of the ribosome [goid 3735] [evidence IEA]	The chemical reactions and pathways resulting in the formation of a protein. This is a ribosome-mediated process in which the information in messenger RNA (mRNA) is used to specify the sequence of amino acids in the protein [goid 6412] [evidence IEA]	+	73251931-73251954:73252989-73253014	ILMN_1773369	GGAGTCAGACTGTCAGTGAAGGAGCACACTGAAGAAGACTTCAAGGGACG	1197	A	730139	NP_057139.1	NM_016055.4	NM_016055.4	RefSeq	NM_016055.4	Homo sapiens	MRPL48	CGI-118; MGC13323	MRPL48	ILMN_24933
0.66224	NM_017426.2	6940201	4	4q21.1a	"Homo sapiens nucleoporin 54kDa (NUP54), mRNA."	53371	26051236	NUP54	MGC13407	"A membrane-bounded organelle of eukaryotic cells in which chromosomes are housed and replicated. In most cells, the nucleus contains all of the cell's chromosomes except the organellar chromosomes, and is the site of RNA synthesis and processing. In some species, or in specialized cell types, RNA metabolism or DNA replication may be absent [goid 5634] [evidence IEA]; Any of the numerous similar …		"The directed movement of proteins into, out of, within or between cells [goid 15031] [evidence IEA]; The directed movement of mRNA, messenger ribonucleic acid, into, out of, within or between cells [goid 51028] [evidence IEA]; The directed movement of proteins in a cell, from one side of a membrane to another [goid 65002] [evidence IEA]"	-	77255448-77255497	ILMN_1771835	CTGCATCAGACCTTCCTTAAGAATGAAACCGACCACATGGAGGGAAAAAG	1697	S	6940201	NP_059122.2	NM_017426.2	NM_017426.2	RefSeq	NM_017426.2	Homo sapiens	NUP54	MGC13407	NUP54	ILMN_27005
0.662513	NM_000234.1	5050113	19	19q13.32c	"Homo sapiens ligase I, DNA, ATP-dependent (LIG1), mRNA."	3978	4557718	LIG1	MGC130025; MGC117397	"A membrane-bounded organelle of eukaryotic cells in which chromosomes are housed and replicated. In most cells, the nucleus contains all of the cell's chromosomes except the organellar chromosomes, and is the site of RNA synthesis and processing. In some species, or in specialized cell types, RNA metabolism or DNA replication may be absent [goid 5634] [pmid 8696349] [evidence TAS]; That part of …	"Interacting selectively with a nucleotide, any compound consisting of a nucleoside that is esterified with (ortho)phosphate or an oligophosphate at any hydroxyl group on the ribose or deoxyribose moiety [goid 166] [evidence IEA]; Interacting selectively with DNA (deoxyribonucleic acid) [goid 3677] [pmid 8696349] [evidence TAS]; Catalysis of the reaction: ATP + deoxyribonucleotide(n) + deoxyribon…	"The process whereby new strands of DNA are synthesized. The template for replication can either be an existing DNA molecule or RNA [goid 6260] [evidence IEA]; The process of restoring DNA after damage. Genomes are subject to damage by chemical and physical agents in the environment (e.g. UV and ionizing radiations, chemical mutagens, fungal and bacterial toxins, etc.) and by free radicals or alk…	-	53310955-53311004	ILMN_1706779	CTTCCCTCGGTTTATTCGAGTCCGTGAAGACAAGCAGCCGGAGCAGGCCA	2733	S	5050113	NP_000225.1	NM_000234.1	NM_000234.1	RefSeq	NM_000234.1	Homo sapiens	LIG1	MGC130025; MGC117397	LIG1	ILMN_8009
0.662525	NM_004856.4	4120278	15	15q23a	"Homo sapiens kinesin family member 23 (KIF23), transcript variant 2, mRNA."	9493	20143965	KIF23	MKLP-1; CHO1; KNSL5; MKLP1	"Any of the long, generally straight, hollow tubes of internal diameter 12-15 nm and external diameter 24 nm found in a wide variety of eukaryotic cells; each consists (usually) of 13 protofilaments of polymeric tubulin, staggered in such a manner that the tubulin monomers are arranged in a helical pattern on the microtubular surface, and with the alpha/beta axes of the tubulin subunits parallel …	"Interacting selectively with a nucleotide, any compound consisting of a nucleoside that is esterified with (ortho)phosphate or an oligophosphate at any hydroxyl group on the ribose or deoxyribose moiety [goid 166] [evidence IEA]; Catalysis of movement along a microtubule, coupled to the hydrolysis of a nucleoside triphosphate (usually ATP) [goid 3777] [evidence IEA]; Interacting selectively with…	"Movement of organelles, other microtubules and other particles along microtubules, mediated by motor proteins [goid 7018] [evidence IEA]; Lengthening of the distance between poles of the mitotic spindle [goid 22] [pmid 1406973] [evidence TAS]; Movement of organelles, other microtubules and other particles along microtubules, mediated by motor proteins [goid 7018] [evidence IEA]; The progression …	+	67526297-67526334:67527185-67527196	ILMN_1811472	CAGCTGGGACCTGGATATCAGCATCACGCACAACCCAAGCGCAAAAAGCC	2635	A	4120278	NP_004847.2	NM_004856.4	NM_004856.4	RefSeq	NM_004856.4	Homo sapiens	KIF23	MKLP-1; CHO1; KNSL5; MKLP1	KIF23	ILMN_11802
0.66266	NM_005327.2	6290709	4	4q25b	"Homo sapiens hydroxyacyl-Coenzyme A dehydrogenase (HADH), nuclear gene encoding mitochondrial protein, mRNA."	3033	94557307	HADH	SCHAD	"All of the contents of a cell excluding the plasma membrane and nucleus, but including other subcellular structures [goid 5737] [pmid 11256614] [evidence IDA]; A semiautonomous, self replicating organelle that occurs in varying numbers, shapes, and sizes in the cytoplasm of virtually all eukaryotic cells. It is notably the site of tissue respiration [goid 5739] [evidence IEA]; A semiautonomous, …	"Catalysis of the reaction: (S)-3-hydroxyacyl-CoA + NAD+ = 3-oxoacyl-CoA + NADH + H+ [goid 3857] [pmid 8687463] [evidence EXP]; Catalysis of the reaction: (S)-3-hydroxyacyl-CoA + NAD+ = 3-oxoacyl-CoA + NADH + H+ [goid 3857] [pmid 8687463] [evidence TAS]; The selective, often stoichiometric, interaction of a molecule with one or more specific sites on another molecule [goid 5488] [evidence IEA]; C…	"The chemical reactions and pathways involving lipids, compounds soluble in an organic solvent but not, or sparingly, in an aqueous solvent. Includes fatty acids; neutral fats, other fatty-acid esters, and soaps; long-chain (fatty) alcohols and waxes; sphingoids and other long-chain bases; glycolipids, phospholipids and sphingolipids; and carotenes, polyprenols, sterols, terpenes and other isopre…	+	108956065-108956114	ILMN_1719906	GCTGCTGAATGGGTCAGCATATCTCTGTTTGCATGGTTTGCAGGAGGTCG	1646	S	6290709	NP_005318.2	NM_005327.2	NM_005327.1	RefSeq	NM_005327.2	Homo sapiens	HADH	HHF4; HADH1; MGC8392; HADHSC; M/SCHAD; HAD; SCHAD	HADH	ILMN_13258
0.663287	NM_006479.3	4150196	12	12p13.32a	"Homo sapiens RAD51 associated protein 1 (RAD51AP1), mRNA."	10635	142383906	RAD51AP1	PIR51	"A membrane-bounded organelle of eukaryotic cells in which chromosomes are housed and replicated. In most cells, the nucleus contains all of the cell's chromosomes except the organellar chromosomes, and is the site of RNA synthesis and processing. In some species, or in specialized cell types, RNA metabolism or DNA replication may be absent [goid 5634] [pmid 9396801] [evidence IC ]"	Interacting selectively with DNA (deoxyribonucleic acid) [goid 3677] [evidence IEA]; Interacting selectively with double-stranded DNA [goid 3690] [pmid 9396801] [evidence IDA]; Interacting selectively with single-stranded DNA [goid 3697] [pmid 9396801] [evidence IDA]; Interacting selectively with an RNA molecule or a portion thereof [goid 3723] [pmid 9396801] [evidence IDA]; Interacting selective…	"The error-free repair of a double-strand break in DNA in which the broken DNA molecule is repaired using homologous sequences. A strand in the broken DNA searches for a homologous region in an intact chromosome to serve as the template for DNA synthesis. The restoration of two intact DNA molecules results in the exchange, reciprocal or nonreciprocal, of genetic material between the intact DNA mo…	+	4539054-4539103	ILMN_1670353	CCCTTTTTCTTGATACCACTCATCCACGTGTTCCTGATTGTCCACATTTC	1692	S	4150196	NP_006470.1	NM_006479.3	NM_006479.2	RefSeq	NM_006479.3	Homo sapiens	RAD51AP1	PIR51	RAD51AP1	ILMN_25046
0.663319	NM_000641.2	3400048	19	19q13.42b	"Homo sapiens interleukin 11 (IL11), mRNA."	3589	24430217	IL11	IL-11; AGIF	"The space external to the outermost structure of a cell. For cells without external protective or external encapsulating structures this refers to space outside of the plasma membrane. This term covers the host cell environment outside an intracellular parasite [goid 5576] [pmid 2145578] [evidence IC ]; That part of a multicellular organism outside the cells proper, usually taken to be outside t…	"Functions to control the survival, growth, differentiation and effector function of tissues and cells [goid 5125] [evidence IEA]; Interacting selectively with the interleukin-11 receptor [goid 5142] [pmid 2145578] [evidence NAS]"	"Any process that mediates the transfer of information from one cell to another [goid 7267] [pmid 2145578] [evidence IC ]; Any process that activates or increases the rate or extent of cell proliferation [goid 8284] [pmid 2145578] [evidence IDA]; A series of progressive, overlapping events triggered by exposure of the platelets to subendothelial tissue. These events include shape change, adhesive…	-	60567986-60568035	ILMN_1788107	GAGCAGGGACTGTCATTCAGGGAGGCTAAGGAGAGAGGCTTGCTTGGGAT	1887	S	3400048	NP_000632.1	NM_000641.2	NM_000641.2	RefSeq	NM_000641.2	Homo sapiens	IL11	IL-11; AGIF	IL11	ILMN_23651
0.66344	NM_133172.2	4120279	5	5q31.3b	"Homo sapiens amyloid beta (A4) precursor protein-binding, family B, member 3 (APBB3), transcript variant 3, mRNA."	10307	95147535	APBB3	MGC87674; SRA; FE65L2	"All of the contents of a cell excluding the plasma membrane and nucleus, but including other subcellular structures [goid 5737] [pmid 10081969] [evidence TAS]; Any of the various filamentous elements that form the internal framework of cells, and typically remain after treatment of the cells with mild detergent to remove membrane constituents and soluble components of the cytoplasm. The term emb…	Interacting selectively with any protein or protein complex (a complex of two or more proteins that may include other nonprotein molecules) [goid 5515] [pmid 10081969] [evidence TAS]; Interacting selectively with any protein or protein complex (a complex of two or more proteins that may include other nonprotein molecules) [goid 5515] [evidence IEA]		-	139938025-139938074	ILMN_1740772	GCCTTCTCTGCCTGTCCCTCCGATCCTTGTCCACCGTCTATTTATTGCCC	1930	A	4120279	NP_573418.2	NM_133172.2	NM_006051.2	RefSeq	NM_133172.2	Homo sapiens	APBB3	MGC87674; SRA; MGC150555; FE65L2	APBB3	ILMN_14368
0.664195	NM_024775.9	5080164	2	2p22.1c	"Homo sapiens gem (nuclear organelle) associated protein 6 (GEMIN6), mRNA."	79833	41393576	GEMIN6	FLJ23459	"A membrane-bounded organelle of eukaryotic cells in which chromosomes are housed and replicated. In most cells, the nucleus contains all of the cell's chromosomes except the organellar chromosomes, and is the site of RNA synthesis and processing. In some species, or in specialized cell types, RNA metabolism or DNA replication may be absent [goid 5634] [evidence IEA]; That part of the nuclear con…	Interacting selectively with any protein or protein complex (a complex of two or more proteins that may include other nonprotein molecules) [goid 5515] [pmid 11748230] [evidence IPI]	"The aggregation, arrangement and bonding together of the spliceosome, a ribonucleoprotein apparatus that catalyzes nuclear mRNA splicing via transesterification reactions [goid 245] [evidence IEA]; The formation and assembly from one or more snRNA and multiple protein components of a ribonucleoprotein complex that in involved in formation of the spliceosome [goid 387] [pmid 11748230] [evidence T…	+	38862393-38862442	ILMN_1707484	AGGGAGACGCTCCAAGGACTCTCTGTGTGGCTGGGGTCCTGACTATAGAC	475	S	5080164	NP_079051.9	NM_024775.9	NM_024775.9	RefSeq	NM_024775.9	Homo sapiens	GEMIN6	FLJ23459	GEMIN6	ILMN_23187
0.664342	NM_002263.2	7330674	6	6p21.32a	"Homo sapiens kinesin family member C1 (KIFC1), mRNA."	3833	68299768	KIFC1	MKLP2; MGC1202; MGC149736; HSET; RAB6-KIFL; KNSL2; MGC149737	"A membrane-bounded organelle of eukaryotic cells in which chromosomes are housed and replicated. In most cells, the nucleus contains all of the cell's chromosomes except the organellar chromosomes, and is the site of RNA synthesis and processing. In some species, or in specialized cell types, RNA metabolism or DNA replication may be absent [goid 5634] [evidence IEA]; Small irregularly shaped int…	"Interacting selectively with a nucleotide, any compound consisting of a nucleoside that is esterified with (ortho)phosphate or an oligophosphate at any hydroxyl group on the ribose or deoxyribose moiety [goid 166] [evidence IEA]; Catalysis of movement along a microtubule, coupled to the hydrolysis of a nucleoside triphosphate (usually ATP) [goid 3777] [pmid 8276466] [evidence NAS]; Interacting s…	"The cell cycle process whereby replicated homologous chromosomes are organized and then physically separated and apportioned to two sets during the mitotic cell cycle. Each replicated chromosome, composed of two sister chromatids, aligns at the cell equator, paired with its homologous partner. One homolog of each morphologic type goes into each of the resulting chromosome sets [goid 70] [pmid 82…	+	33482588-33482630:33485401-33485407	ILMN_2222008	GAACGTCTCCGAGTCCCTCAACTCTCTACGCTTTGCCTCCAAGGTGAACC	2093	S	7330674	NP_002254.1	NM_002263.2	NM_002263.2	RefSeq	NM_002263.2	Homo sapiens	KIFC1	HSET; MKLP2; RAB6-KIFL; KNSL2; MGC1202; MGC149736; MGC149737	KIFC1	ILMN_8595
0.664382	NM_017785.3	520528		5q35.1b	"Homo sapiens coiled-coil domain containing 99 (CCDC99), mRNA."	54908	141802559	CCDC99							ILMN_1695357	GCTTGACTCTAACCTGGAGAGCTTCTTAAGTGATGCCCCTTCATGGAGCT	2115	S	520528	NP_060255.2	NM_017785.3	NM_017785.2	RefSeq	NM_017785.3	Homo sapiens	CCDC99	FLJ20364	CCDC99	ILMN_29954
0.664533	NM_173608.1	7100008	14	14q32.33d	"Homo sapiens chromosome 14 open reading frame 80 (C14orf80), mRNA."	283643	27734692	C14ORF80	MGC16771				+	105036505-105036554	ILMN_1653553	CTAGCAGCACTGGGGACAGGAATGACTGGTCCCTTGAGGAGGTCGTGACA	1253	S	7100008	NP_775879.1	NM_173608.1	NM_173608.1	RefSeq	NM_173608.1	Homo sapiens	C14orf80	MGC16771	C14ORF80	ILMN_22897
0.664802	NM_014550.3	3840678	22	22q13.1a	"Homo sapiens caspase recruitment domain family, member 10 (CARD10), mRNA."	29775	51093860	CARD10	CARMA3; BIMP1; MGC142219	"The living contents of a cell; the matter contained within (but not including) the plasma membrane, usually taken to exclude large vacuoles and masses of secretory or ingested material. In eukaryotes it includes the nucleus and cytoplasm [goid 5622] [evidence IEA]; All of the contents of a cell excluding the plasma membrane and nucleus, but including other subcellular structures [goid 5737] [pmi…	Interacting selectively with any protein or protein complex (a complex of two or more proteins that may include other nonprotein molecules) [goid 5515] [pmid 11259443] [evidence IPI]; Functions to provide a physical support for the assembly of a multiprotein receptor signaling complex [goid 30159] [pmid 11259443] [evidence NAS]; Interacting selectively with any protein or protein complex (a compl…	"The aggregation, arrangement and bonding together of a set of components to form a protein complex [goid 6461] [pmid 11259443] [evidence NAS]; The stimulation of the activity of NF-kappaB-inducing kinase through phosphorylation at specific residues [goid 7250] [pmid 11259443] [evidence IDA]; Any process that modulates the occurrence or rate of cell death by apoptosis [goid 42981] [evidence IEA];…	-	37886610-37886659	ILMN_1743714	CCTCACATGGGTGTCTGTGGTTCTCTCCTGTGTAAATGTCACGCCCCACC	3639	S	3840678	NP_055365.2	NM_014550.3	NM_014550.3	RefSeq	NM_014550.3	Homo sapiens	CARD10	CARMA3; BIMP1; MGC142219	CARD10	ILMN_28765
0.665276	NM_018321.3	1110722	5	5p13.2d	"Homo sapiens BRX1, biogenesis of ribosomes, homolog (S. cerevisiae) (BRIX1), mRNA."	55299	55770899	BRIX1	BRIX; FLJ11100				+	34925433-34925482	ILMN_2155172	CCACATGATCCCACTGCAGATGTTTTTGTAACACCAGCTGAGGAGAAACC	919	S	1110722	NP_060791.3	NM_018321.3	NM_018321.3	RefSeq	NM_018321.3	Homo sapiens	BRIX1	BRIX; FLJ11100	BRIX1	ILMN_4503
0.665927	NM_181503.1	5550356	13	13q13.3b	"Homo sapiens exosome component 8 (EXOSC8), mRNA."	11340	31415881	EXOSC8	Rrp43p; EAP2; RRP43; RP11-421P11.3; CIP3; bA421P11.3; OIP2; p9	"Complex of 3'-5' exoribonucleases [goid 178] [evidence IEA]; The part of a cell or its extracellular environment in which a gene product is located. A gene product may be located in one or more parts of a cell and its location may be as specific as a particular macromolecular complex, that is, a stable, persistent association of macromolecules that function together [goid 5575] [evidence ND ]; A…	"Catalysis of the sequential cleavage of mononucleotides from a free 3' terminus of an RNA molecule [goid 175] [evidence IEA]; Elemental activities, such as catalysis or binding, describing the actions of a gene product at the molecular level. A given gene product may exhibit one or more molecular functions [goid 3674] [evidence ND ]; Interacting selectively with an RNA molecule or a portion ther…	"Any process involved in the conversion of a primary ribosomal RNA (rRNA) transcript into one or more mature rRNA molecules [goid 6364] [evidence IEA]; Any process involved in the conversion of one or more primary RNA transcripts into one or more mature RNA molecules [goid 6396] [evidence IEA]; Any process specifically pertinent to the functioning of integrated living units: cells, tissues, organ…	+	36480945-36480972:36481321-36481342	ILMN_1756162	GGCAAACTCTGTTGTCTTCACAAACCAGGTGGAAGTGGGCTAACTGGAGC	714	S	5550356	NP_852480.1	NM_181503.1	NM_181503.1	RefSeq	NM_181503.1	Homo sapiens	EXOSC8	Rrp43p; EAP2; RRP43; RP11-421P11.3; CIP3; bA421P11.3; OIP2; p9	EXOSC8	ILMN_1976
0.665978	NM_032361.1	2480328	5	5q35.2c	"Homo sapiens THO complex 3 (THOC3), mRNA."	84321	14150170	THOC3	TEX1; MGC5469	"A membrane-bounded organelle of eukaryotic cells in which chromosomes are housed and replicated. In most cells, the nucleus contains all of the cell's chromosomes except the organellar chromosomes, and is the site of RNA synthesis and processing. In some species, or in specialized cell types, RNA metabolism or DNA replication may be absent [goid 5634] [evidence IEA]"	Interacting selectively with an RNA molecule or a portion thereof [goid 3723] [evidence IEA]	"Any process involved in the conversion of a primary mRNA transcript into one or more mature mRNA(s) prior to translation into polypeptide [goid 6397] [evidence IEA]; The directed movement of substances (such as macromolecules, small molecules, ions) into, out of, within or between cells, or within a multicellular organism [goid 6810] [evidence IEA]; The process of removing sections of the primar…	-	175319643-175319692	ILMN_2415926	CGTGGCACCCCAAAAGGCCTCTGCTGGCATTTGCCTGTGATGACAAAGAC	1010	A	2480328	NP_115737.1	NM_032361.1	NM_032361.1	RefSeq	NM_032361.1	Homo sapiens	THOC3	TEX1; MGC5469	THOC3	ILMN_17969
0.666057	NM_001002800.1	5910689	3	3q26.1a	"Homo sapiens structural maintenance of chromosomes 4 (SMC4), transcript variant 2, mRNA."	10051	50658062	SMC4	SMC4L1; CAPC; hCAP-C	"A multisubunit protein complex that plays a central role in chromosome condensation [goid 796] [pmid 11850403] [evidence TAS]; A membrane-bounded organelle of eukaryotic cells in which chromosomes are housed and replicated. In most cells, the nucleus contains all of the cell's chromosomes except the organellar chromosomes, and is the site of RNA synthesis and processing. In some species, or in s…	"Interacting selectively with a nucleotide, any compound consisting of a nucleoside that is esterified with (ortho)phosphate or an oligophosphate at any hydroxyl group on the ribose or deoxyribose moiety [goid 166] [evidence IEA]; Interacting selectively with any protein or protein complex (a complex of two or more proteins that may include other nonprotein molecules) [goid 5515] [evidence IEA]; …	"The progression of biochemical and morphological phases and events that occur in a cell during successive cell replication or nuclear replication events. Canonically, the cell cycle comprises the replication and segregation of genetic material followed by the division of the cell, but in endocycles or syncytial cells nuclear replication or nuclear division may not be followed by cell division [g…	+	160152343-160152392	ILMN_2330861	GGTTTACCAGGATGTAGTCCCACTGTTGAGGAGCATCTATTTAGGGGTTA	4726	A	5910689	NP_001002800.1	NM_001002800.1	NM_001002800.1	RefSeq	NM_001002800.1	Homo sapiens	SMC4	SMC4L1; CAPC; hCAP-C	SMC4	ILMN_16070
0.666138	NM_006467.2	3400037	5	5q14.3g	"Homo sapiens polymerase (RNA) III (DNA directed) polypeptide G (32kD) (POLR3G), mRNA."	10622	115529474	POLR3G	RPC32; RPC7	"A membrane-bounded organelle of eukaryotic cells in which chromosomes are housed and replicated. In most cells, the nucleus contains all of the cell's chromosomes except the organellar chromosomes, and is the site of RNA synthesis and processing. In some species, or in specialized cell types, RNA metabolism or DNA replication may be absent [goid 5634] [evidence IEA]; RNA polymerase III, one of t…	"Catalysis of the reaction: nucleoside triphosphate + RNA(n) = diphosphate + RNA(n+1). Utilizes a DNA template, i.e. the catalysis of DNA-template-directed extension of the 3'-end of an RNA strand by one nucleotide at a time. Can initiate a chain 'de novo' [goid 3899] [pmid 9171375] [evidence TAS]"	"The synthesis of either RNA on a template of DNA or DNA on a template of RNA [goid 6350] [evidence IEA]; Any process that modulates the frequency, rate or extent of transcription from an RNA ploymerase III promoter [goid 6359] [pmid 9171375] [evidence TAS]"	+	89809735-89809784	ILMN_3251691	GGGCAAGGATTTACTCTGGGAGGTACCGTTAAGAGCCTTCTTTCCCCCTT	2808	S	3400037	NP_006458.2	NM_006467.2	NM_006467.2	RefSeq	NM_006467.2	Homo sapiens	POLR3G	RPC32; RPC7	POLR3G	ILMN_13297

## Sheet: TABLE S1B - UPREGULATED GENES
TABLE S1B. List of genes that are upregulated upon K-H knockdown in MDA-MB-231 cells identified by gene expression microarray.
Fold Change	ACCESSION	ARRAY_ADDRESS_ID	CHROMOSOME	CYTOBAND	DEFINITION	ENTREZ_GENE_ID	GI	ILMN_GENE	OBSOLETE_PROBE_ID	ONTOLOGY_COMPONENT	ONTOLOGY_FUNCTION	ONTOLOGY_PROCESS	PROBE_CHR_ORIENTATION	PROBE_COORDINATES	PROBE_ID	PROBE_SEQUENCE	PROBE_START	PROBE_TYPE	ProbeID	PROTEIN_PRODUCT	REFSEQ_ID	SEARCH_KEY	SOURCE	SOURCE_REFERENCE_ID	SPECIES	SYMBOL	SYNONYMS	TargetID	TRANSCRIPT	UNIGENE_ID
3.66732	NM_005434.3	620102	2	2q13b	"Homo sapiens mal, T-cell differentiation protein-like (MALL), mRNA."	7851	36054106	MALL	MGC4419; BENE	"The lipid bilayer surrounding any of the compartments of the Golgi apparatus [goid 139] [pmid 11294831] [evidence IDA]; The membrane surrounding a cell that separates the cell from its external environment. It consists of a phospholipid bilayer and associated proteins [goid 5886] [pmid 11294831] [evidence IDA]; Penetrating at least one phospholipid bilayer of a membrane. May also refer to the st…	Interacting selectively with any protein or protein complex (a complex of two or more proteins that may include other nonprotein molecules) [goid 5515] [pmid 11294831] [evidence IPI]	Any process involved in the maintenance of an internal equilibrium of cholesterol within an organism or cell [goid 42632] [pmid 11294831] [evidence NAS]	-	110199078-110199127	ILMN_2063168	GCTCTTCTGTTGACCCAGACGAATAGGGCACAGCCCTGTAACTGCACGTG	2174	S	620102	NP_005425.1	NM_005434.3	NM_005434.3	RefSeq	NM_005434.3	Homo sapiens	MALL	MGC4419; BENE	MALL	ILMN_17870
3.35809	NM_007069.2	2510593	11	11q12.3b-q13.1a	"Homo sapiens HRAS-like suppressor 3 (HRASLS3), mRNA."	11145	142370028	HRASLS3	HREV107-3; HREV107; H-REV107-1; MGC118754	"The part of a cell or its extracellular environment in which a gene product is located. A gene product may be located in one or more parts of a cell and its location may be as specific as a particular macromolecular complex, that is, a stable, persistent association of macromolecules that function together [goid 5575] [evidence ND ]; Double layer of lipid molecules that encloses all cells, and, …	"Elemental activities, such as catalysis or binding, describing the actions of a gene product at the molecular level. A given gene product may exhibit one or more molecular functions [goid 3674] [pmid 9771974] [evidence ND ]; Interacting selectively with any protein or protein complex (a complex of two or more proteins that may include other nonprotein molecules) [goid 5515] [pmid 17374643] [evid…	"Any process specifically pertinent to the functioning of integrated living units: cells, tissues, organs, and organisms. A process is a collection of molecular events with a defined beginning and end [goid 8150] [evidence ND ]; Any process that stops, prevents or reduces the rate or extent of progression through the cell cycle [goid 45786] [evidence IEA]"	-	63099026-63099075	ILMN_1667711	GCAAGCGTTGCAGGAATGGGCTTGGCAGCCATGAGCCTTATTGGAGTCAT	815	S	2510593	NP_009000.1	NM_007069.2	NM_007069.1	RefSeq	NM_007069.2	Homo sapiens	HRASLS3	HREV107-3; HREV107; H-REV107-1; MGC118754	HRASLS3	ILMN_15631
3.07004	NM_001511.1	5720039	4	4q13.3d	"Homo sapiens chemokine (C-X-C motif) ligand 1 (melanoma growth stimulating activity, alpha) (CXCL1), mRNA."	2919	4504152	CXCL1	GROa; FSP; GRO1; MGSA alpha; NAP-3; MGSA-a; MGSA; SCYB1	"The space external to the outermost structure of a cell. For cells without external protective or external encapsulating structures this refers to space outside of the plasma membrane. This term covers the host cell environment outside an intracellular parasite [goid 5576] [evidence IEA]; That part of a multicellular organism outside the cells proper, usually taken to be outside the plasma membr…	The function of a family of chemotactic pro-inflammatory activation-inducible cytokines acting primarily upon hemopoietic cells in immunoregulatory processes; all chemokines possess a number of conserved cysteine residues involved in intramolecular disulfide bond formation [goid 8009] [pmid 10820279] [evidence TAS]; Increases the activity of an enzyme [goid 8047] [pmid 9079638] [evidence TAS]; Th…	"The directed movement of a motile cell or organism, or the directed growth of a cell guided by a specific chemical concentration gradient. Movement may be towards a higher concentration (positive chemotaxis) or towards a lower concentration (negative chemotaxis) [goid 6935] [pmid 10820279] [evidence TAS]; The immediate defensive reaction (by vertebrate tissue) to infection or injury caused by ch…	+	74736642-74736691	ILMN_1787897	GGCTGGCGGATCCAAGCAAATGGCCAATGAGATCATTGTGAAGGCAGGGG	792	S	5720039	NP_001502.1	NM_001511.1	NM_001511.1	RefSeq	NM_001511.1	Homo sapiens	CXCL1	GROa; FSP; GRO1; MGSA alpha; NAP-3; MGSA-a; MGSA; SCYB1	CXCL1	ILMN_17166
3.01397	NM_021101.3	5960296	3	3q28c	"Homo sapiens claudin 1 (CLDN1), mRNA."	9076	21536297	CLDN1	SEMP1; ILVASC; CLD1	The membrane surrounding a cell that separates the cell from its external environment. It consists of a phospholipid bilayer and associated proteins [goid 5886] [evidence IEA]; Penetrating at least one phospholipid bilayer of a plasma membrane. May also refer to the state of being buried in the bilayer with no exposure outside the bilayer [goid 5887] [pmid 9647647] [evidence TAS]; A belt-like reg…	The action of a molecule that contributes to the structural integrity of a complex or assembly within or outside a cell [goid 5198] [evidence IEA]; Interacting selectively with an identical protein or proteins [goid 42802] [evidence ISS]	"The attachment of a cell, either to another cell or to an underlying substrate such as the extracellular matrix, via cell adhesion molecules [goid 7155] [pmid 9647647] [evidence TAS]; The attachment of one cell to another cell via adhesion molecules that do not require the presence of calcium for the interaction [goid 16338] [evidence ISS]; Any process by which an organism has an effect on an or…	-	191506599-191506648	ILMN_1724686	GTGCTATCTGTTCAGTGATGCCCTCAGAGCTCTTGCTGTTAGCTGGCAGC	2967	S	5960296	NP_066924.1	NM_021101.3	NM_021101.3	RefSeq	NM_021101.3	Homo sapiens	CLDN1	SEMP1; ILVASC; CLD1	CLDN1	ILMN_177119
2.95319	NM_001642.1	3450577	11	11q24.3c	"Homo sapiens amyloid beta (A4) precursor-like protein 2 (APLP2), mRNA."	334	4502146	APLP2	CDEBP; APPH; APPL2	"A membrane-bounded organelle of eukaryotic cells in which chromosomes are housed and replicated. In most cells, the nucleus contains all of the cell's chromosomes except the organellar chromosomes, and is the site of RNA synthesis and processing. In some species, or in specialized cell types, RNA metabolism or DNA replication may be absent [goid 5634] [pmid 7702756] [evidence IDA]; The membrane …	"Interacting selectively with DNA (deoxyribonucleic acid) [goid 3677] [pmid 7702756] [evidence NAS]; Stops, prevents or reduces the activity of serine-type endopeptidases, enzymes that catalyze the hydrolysis of nonterminal peptide bonds in a polypeptide chain; a serine residue (and a histidine residue) are at the active center of the enzyme [goid 4867] [evidence IEA]; Interacting selectively wit…	"Specific actions of a newborn or infant mammal that result in the derivation of nourishment from the breast [goid 1967] [evidence IEA]; The regulation of the levels, transport, and metabolism of copper ions within a cell or between a cell and its external environment [goid 6878] [evidence IEA]; Any process that modulates the frequency, rate or extent of EGF receptor activity [goid 7176] [evidenc…	+	129519408-129519457	ILMN_1710482	TTCTCCAAAGGCACTGACCCTCGGCCTCTACTTTGTCCCCTCACCTCCAC	3219	S	3450577	NP_001633.1	NM_001642.1	NM_001642.1	RefSeq	NM_001642.1	Homo sapiens	APLP2	CDEBP; APPH; APPL2	APLP2	ILMN_19935
2.9078	NM_000575.3	1980672	2	2q13d	"Homo sapiens interleukin 1, alpha (IL1A), mRNA."	3552	27894329	IL1A	IL1F1; IL1-ALPHA; IL1; IL-1A	"The space external to the outermost structure of a cell. For cells without external protective or external encapsulating structures this refers to space outside of the plasma membrane. This term covers the host cell environment outside an intracellular parasite [goid 5576] [evidence IEA]; That part of a multicellular organism outside the cells proper, usually taken to be outside the plasma membr…	Mediates the transfer of a signal from the outside to the inside of a cell by means other than the introduction of the signal molecule itself into the cell [goid 4871] [pmid 10861041] [evidence TAS]; Mediates the transfer of a signal from the outside to the inside of a cell by means other than the introduction of the signal molecule itself into the cell [goid 4871] [pmid 10748004] [evidence TAS];…	"A rise in body temperature above the normal, often as a response to infection [goid 1660] [evidence IEA]; A form of programmed cell death induced by external or internal signals that trigger the activity of proteolytic caspases, whose actions dismantle the cell and result in cell death. Apoptosis begins internally with condensation and subsequent fragmentation of the cell nucleus (blebbing) whil…	-	113531834-113531883	ILMN_1658483	CAGGGCATTTTGGTCCAAGTTGTGCTTATCCCATAGCCAGGAAACTCTGC	2536	S	1980672	NP_000566.3	NM_000575.3	NM_000575.3	RefSeq	NM_000575.3	Homo sapiens	IL1A	IL1F1; IL1-ALPHA; IL1; IL-1A	IL1A	ILMN_25320
2.88871	NM_004331.2	2640192	8	8p21.2b	"Homo sapiens BCL2/adenovirus E1B 19kDa interacting protein 3-like (BNIP3L), mRNA."	665	47078259	BNIP3L	BNIP3a; NIX	"A membrane-bounded organelle of eukaryotic cells in which chromosomes are housed and replicated. In most cells, the nucleus contains all of the cell's chromosomes except the organellar chromosomes, and is the site of RNA synthesis and processing. In some species, or in specialized cell types, RNA metabolism or DNA replication may be absent [goid 5634] [evidence IEA]; The double lipid bilayer enc…	Interacting selectively with lamin; any of a group of intermediate-filament proteins that form the fibrous matrix on the inner surface of the nuclear envelope [goid 5521] [pmid 10381623] [evidence IDA]; Interacting selectively with an identical protein to form a homodimer [goid 42803] [pmid 10381623] [evidence IDA]; Interacting selectively with a nonidentical protein to form a heterodimer [goid 4…	"A process that directly activates any of the steps required for cell death by apoptosis [goid 6917] [pmid 9973195] [evidence IDA]; Any process that stops, prevents or reduces the frequency, rate or extent of survival gene product expression; survival gene products are those that antagonize the apoptotic program. Regulation can be at the transcriptional, translational, or posttranslational level …	+	26269939-26269988	ILMN_1718961	GTGCATTGTGCTCTTTCCAAGTTCAGCAGCAGTTCTATCAGTGGTGCCAC	2795	S	2640192	NP_004322.1	NM_004331.2	NM_004331.2	RefSeq	NM_004331.2	Homo sapiens	BNIP3L	BNIP3a; NIX	BNIP3L	ILMN_13842
2.77951	NM_001024847.2	6560091	3	3p24.1a	"Homo sapiens transforming growth factor, beta receptor II (70/80kDa) (TGFBR2), transcript variant 1, mRNA."	7048	133908632	TGFBR2	RIIC; MFS2; HNPCC6; TAAD2; AAT3; TGFR-2; FAA3; TGFbeta-RII	"The membrane surrounding a cell that separates the cell from its external environment. It consists of a phospholipid bilayer and associated proteins [goid 5886] [pmid 9865696] [evidence EXP]; The membrane surrounding a cell that separates the cell from its external environment. It consists of a phospholipid bilayer and associated proteins [goid 5886] [pmid 11100470] [evidence EXP]; The side of t…	"Interacting selectively with a nucleotide, any compound consisting of a nucleoside that is esterified with (ortho)phosphate or an oligophosphate at any hydroxyl group on the ribose or deoxyribose moiety [goid 166] [evidence IEA]; Interacting selectively with magnesium (Mg) ions [goid 287] [evidence IEA]; [goid 4702] [evidence IEA]; Combining with an extracellular or intracellular messenger to in…	"The process whose specific outcome is the progression of the blood vessel over time, from its formation to the mature structure. The blood vessel is the vasculature carrying blood [goid 1568] [pmid 10092230] [evidence TAS]; The process that regulates the coordinated growth and sprouting of blood vessels giving rise to the organized vascular system [goid 1569] [evidence ISS]; The differentiation …	+	30709225-30709274	ILMN_1726245	GGCGCCTAGAAATTCCACTTGCACCGTAGGGCATGCTGATACCATCCCAA	4202	A	6560091	NP_001020018.1	NM_001024847.2	NM_001024847.1	RefSeq	NM_001024847.2	Homo sapiens	TGFBR2	RIIC; MFS2; TAAD2; AAT3; TGFR-2; FAA3; TGFbeta-RII	TGFBR2	ILMN_22189
2.72862	NM_019026.2	1470209	1	1q24.1a	"Homo sapiens transmembrane and coiled-coil domains 1 (TMCO1), mRNA."	54499	68131549	TMCO1	HP10122; TMCC4; RP11-466F5.7; PCIA3; PNAS-136	"The lipid bilayer surrounding any of the compartments of the Golgi apparatus [goid 139] [evidence IEA]; The irregular network of unit membranes, visible only by electron microscopy, that occurs in the cytoplasm of many eukaryotic cells. The membranes form a complex meshwork of tubular channels, which are often expanded into slitlike cavities called cisternae. The ER takes two forms, rough (or gr…			-	163963529-163963578	ILMN_1793829	CGACTCTCAAGGCACTGTGTATGCCCTGCAAGTTGGCTGTCTATGAGCAT	972	S	1470209	NP_061899.1	NM_019026.2	NM_019026.2	RefSeq	NM_019026.2	Homo sapiens	TMCO1	HP10122; TMCC4; RP11-466F5.7; PCIA3; PNAS-136	TMCO1	ILMN_8084
2.69223	NM_005627.3	1410209	6	6q23.2d	"Homo sapiens serum/glucocorticoid regulated kinase 1 (SGK1), transcript variant 1, mRNA."	6446	163644253	SGK1	SGK1	"A membrane-bounded organelle of eukaryotic cells in which chromosomes are housed and replicated. In most cells, the nucleus contains all of the cell's chromosomes except the organellar chromosomes, and is the site of RNA synthesis and processing. In some species, or in specialized cell types, RNA metabolism or DNA replication may be absent [goid 5634] [evidence IEA]; All of the contents of a cel…	"Interacting selectively with a nucleotide, any compound consisting of a nucleoside that is esterified with (ortho)phosphate or an oligophosphate at any hydroxyl group on the ribose or deoxyribose moiety [goid 166] [evidence IEA]; Catalysis of the reaction: ATP + a protein serine/threonine = ADP + protein serine/threonine phosphate [goid 4674] [evidence IEA]; Interacting selectively with ATP, ade…	"The process of introducing a phosphate group on to a protein [goid 6468] [evidence IEA]; The process of introducing a phosphate group on to a protein [goid 6468] [evidence IEA]; A change in state or activity of a cell or an organism (in terms of movement, secretion, enzyme production, gene expression, etc.) as a result of a stimulus indicating damage to its DNA from environmental insults or erro…	-	134491069-134491118	ILMN_3229324	CGGACGCTGTTCTAAAAAAGGTCTCCTGCAGATCTGTCTGGGCTGTGATG	1672	A	1410209	NP_005618.2	NM_005627.3	NM_005627.3	RefSeq	NM_005627.3	Homo sapiens	SGK1	SGK	SGK1	ILMN_2451
2.68123	NM_001710.4	3370349	6	6p21.32b	"Homo sapiens complement factor B (CFB), mRNA."	629	67782357	CFB	H2-Bf; CFAB; BFD; BF; GBG; PBF2	The space external to the outermost structure of a cell. For cells without external protective or external encapsulating structures this refers to space outside of the plasma membrane. This term covers the host cell environment outside an intracellular parasite [goid 5576] [evidence IEA]; The space external to the outermost structure of a cell. For cells without external protective or external en…	"Catalysis of a biochemical reaction at physiological temperatures. In biologically catalyzed reactions, the reactants are known as substrates, and the catalysts are naturally occurring macromolecular substances known as enzymes. Enzymes possess specific binding sites for substrates, and are usually composed wholly or largely of protein, but RNA that has catalytic activity (ribozyme) is often als…	The hydrolysis of a peptide bond or bonds within a protein [goid 6508] [evidence IEA]; Any process involved in the activation of any of the steps of the alternative pathway of the complement cascade which allows for the direct killing of microbes and the regulation of other immune processes [goid 6957] [evidence IEA]; The hydrolysis of a peptide bond or bonds within a protein [goid 6508] [evidenc…	+	32027200-32027229:32027311-32027330	ILMN_1774287	GTCCCTATGCTGACCCCAATACTTGCAGAGGTGATTCTGGCGGCCCCTTG	2286	S	3370349	NP_001701.2	NM_001710.4	NM_001710.4	RefSeq	NM_001710.4	Homo sapiens	CFB	H2-Bf; CFAB; BFD; BF; GBG; PBF2	CFB	ILMN_164971
2.67679	NM_004591.1	4220246	2	2q36.3c	"Homo sapiens chemokine (C-C motif) ligand 20 (CCL20), mRNA."	6364	4759075	CCL20	SCYA20; MIP-3a; MIP3A; CKb4; LARC; ST38	"The space external to the outermost structure of a cell. For cells without external protective or external encapsulating structures this refers to space outside of the plasma membrane. This term covers the host cell environment outside an intracellular parasite [goid 5576] [evidence IEA]; That part of a multicellular organism outside the cells proper, usually taken to be outside the plasma membr…	"Functions to control the survival, growth, differentiation and effector function of tissues and cells [goid 5125] [evidence IEA]; Interacting selectively with any protein or protein complex (a complex of two or more proteins that may include other nonprotein molecules) [goid 5515] [evidence IEA]; The function of a family of chemotactic pro-inflammatory activation-inducible cytokines acting prima…	"The directed movement of a motile cell or organism, or the directed growth of a cell guided by a specific chemical concentration gradient. Movement may be towards a higher concentration (positive chemotaxis) or towards a lower concentration (negative chemotaxis) [goid 6935] [pmid 10438902] [evidence TAS]; The immediate defensive reaction (by vertebrate tissue) to infection or injury caused by ch…	+	228390096-228390145	ILMN_1657234	CCTTGCTGGGGTTGGAGGTTTCACTTGCACATCATGGAGGGTTTAGTGCT	402	S	4220246	NP_004582.1	NM_004591.1	NM_004591.1	RefSeq	NM_004591.1	Homo sapiens	CCL20	SCYA20; MIP-3a; MIP3A; CKb4; LARC; ST38	CCL20	ILMN_1789
2.63802	NM_005627.3	2030324	6	6q23.2d	"Homo sapiens serum/glucocorticoid regulated kinase 1 (SGK1), transcript variant 1, mRNA."	6446	163644253	SGK1	SGK1	"A membrane-bounded organelle of eukaryotic cells in which chromosomes are housed and replicated. In most cells, the nucleus contains all of the cell's chromosomes except the organellar chromosomes, and is the site of RNA synthesis and processing. In some species, or in specialized cell types, RNA metabolism or DNA replication may be absent [goid 5634] [evidence IEA]; All of the contents of a cel…	"Interacting selectively with a nucleotide, any compound consisting of a nucleoside that is esterified with (ortho)phosphate or an oligophosphate at any hydroxyl group on the ribose or deoxyribose moiety [goid 166] [evidence IEA]; Catalysis of the reaction: ATP + a protein serine/threonine = ADP + protein serine/threonine phosphate [goid 4674] [evidence IEA]; Interacting selectively with ATP, ade…	"The process of introducing a phosphate group on to a protein [goid 6468] [evidence IEA]; The process of introducing a phosphate group on to a protein [goid 6468] [evidence IEA]; A change in state or activity of a cell or an organism (in terms of movement, secretion, enzyme production, gene expression, etc.) as a result of a stimulus indicating damage to its DNA from environmental insults or erro…	-	134490933-134490982	ILMN_3305938	CCTTGTGGATATGCTGTGTGAACCGTCGTGTGAGTGTGGTATGCCTGATC	1808	M	2030324	NP_005618.2	NM_005627.3	NM_005627.3	RefSeq	NM_005627.3	Homo sapiens	SGK1	SGK	SGK1	ILMN_2451
2.63487	NM_000598.4	6590132	7	7p13b	"Homo sapiens insulin-like growth factor binding protein 3 (IGFBP3), transcript variant 2, mRNA."	3486	62243067	IGFBP3	BP-53; IBP3	"The space external to the outermost structure of a cell. For cells without external protective or external encapsulating structures this refers to space outside of the plasma membrane. This term covers the host cell environment outside an intracellular parasite [goid 5576] [pmid 14718574] [evidence NAS]; A membrane-bounded organelle of eukaryotic cells in which chromosomes are housed and replica…	"Increases the activity of a phosphatase, an enzyme which catalyzes of the removal of a phosphate group from a tyrosyl phenolic group of a protein [goid 8160] [pmid 11940579] [evidence IDA]; Interacting selectively with insulin-like growth factor I [goid 31994] [pmid 10766744] [evidence IPI]; Interacting selectively with any metal ion [goid 46872] [pmid 14576163] [evidence NAS]"	"Any process that modulates the frequency, rate or extent of cell growth [goid 1558] [evidence IEA]; Any process that stops, prevents or decreases the rate of addition of phosphate groups to amino acids within a protein [goid 1933] [pmid 17591901] [evidence IDA]; Any process that stops, prevents or reduces the frequency, rate or extent of signal transduction [goid 9968] [pmid 11940579] [evidence …	-	45952202-45952251	ILMN_1746085	GATACAACTGTGGCCATGACTGAGGAAAGGAGCTCACGCCCAGAGACTGG	2205	A	6590132	NP_000589.2	NM_000598.4	NM_001013398.1	RefSeq	NM_000598.4	Homo sapiens	IGFBP3	IBP3; BP-53	IGFBP3	ILMN_28010
2.56401	NM_001024847.1	5490070	3	3p24.1a	"Homo sapiens transforming growth factor, beta receptor II (70/80kDa) (TGFBR2), transcript variant 1, mRNA."	7048	67782325	TGFBR2	RIIC; MFS2; HNPCC6; TAAD2; AAT3; TGFR-2; FAA3; TGFbeta-RII	"The membrane surrounding a cell that separates the cell from its external environment. It consists of a phospholipid bilayer and associated proteins [goid 5886] [pmid 9865696] [evidence EXP]; The membrane surrounding a cell that separates the cell from its external environment. It consists of a phospholipid bilayer and associated proteins [goid 5886] [pmid 11100470] [evidence EXP]; The side of t…	"Interacting selectively with a nucleotide, any compound consisting of a nucleoside that is esterified with (ortho)phosphate or an oligophosphate at any hydroxyl group on the ribose or deoxyribose moiety [goid 166] [evidence IEA]; Interacting selectively with magnesium (Mg) ions [goid 287] [evidence IEA]; [goid 4702] [evidence IEA]; Combining with an extracellular or intracellular messenger to in…	"The process whose specific outcome is the progression of the blood vessel over time, from its formation to the mature structure. The blood vessel is the vasculature carrying blood [goid 1568] [pmid 10092230] [evidence TAS]; The process that regulates the coordinated growth and sprouting of blood vessels giving rise to the organized vascular system [goid 1569] [evidence ISS]; The differentiation …	+	30710194-30710243	ILMN_2384241	GCCCATTGACCTCTAGTGGTGAGTTTCTAGAATACTGGTCCATTCATGAG	4260	A	5490070	NP_001020018.1	NM_001024847.1	NM_001024847.1	RefSeq	NM_001024847.1	Homo sapiens	TGFBR2	RIIC; MFS2; HNPCC6; TAAD2; AAT3; TGFR-2; FAA3; TGFbeta-RII	TGFBR2	ILMN_22189
2.55785	NM_000600.1	4040576	7	7p15.3c	"Homo sapiens interleukin 6 (interferon, beta 2) (IL6), mRNA."	3569	10834983	IL6	HSF; HGF; IL-6; BSF2; IFNB2	"The space external to the outermost structure of a cell. For cells without external protective or external encapsulating structures this refers to space outside of the plasma membrane. This term covers the host cell environment outside an intracellular parasite [goid 5576] [pmid 14718574] [evidence NAS]; The space external to the outermost structure of a cell. For cells without external protecti…	"Functions to control the survival, growth, differentiation and effector function of tissues and cells [goid 5125] [evidence IEA]; Interacting selectively with the interleukin-6 receptor [goid 5138] [pmid 1883960] [evidence NAS]; Interacting selectively with any protein or protein complex (a complex of two or more proteins that may include other nonprotein molecules) [goid 5515] [evidence IEA]"	"The process of apoptosis in neutrophils [goid 1781] [pmid 7595060] [evidence IDA]; Process involving non-antibody proteins whose concentrations in the plasma increase in response to infection or injury of homeothermic animals [goid 6953] [evidence IEA]; The immediate defensive reaction (by vertebrate tissue) to infection or injury caused by chemical or physical agents. The process is characteriz…	+	22737683-22737717:22737718-22737732	ILMN_1699651	TGCAGTCCAGCCTGAGGGCTCTTCGGCAAATGTAGCATGGGCACCTCAGA	667	S	4040576	NP_000591.1	NM_000600.1	NM_000600.1	RefSeq	NM_000600.1	Homo sapiens	IL6	IL-6; HSF; BSF2; IFNB2; HGF	IL6	ILMN_6469
2.53731	NM_005627.2	4390450	6	6q23.2d	"Homo sapiens serum/glucocorticoid regulated kinase (SGK), mRNA."	6446	25168262	SGK	SGK1				-	134532365-134532414	ILMN_1702487	AGAAAGGGTTTTTATGGACCAATGCCCCAGTTGTCAGTCAGAGCCGTTGG	2037	S	4390450	NP_005618.2	NM_005627.2	NM_005627.2	RefSeq	NM_005627.2	Homo sapiens	SGK	SGK1	SGK	ILMN_2451
2.52278	NM_058246.3	5860315	7	7q36.3c	"Homo sapiens DnaJ (Hsp40) homolog, subfamily B, member 6 (DNAJB6), transcript variant 1, mRNA."	10049	34328906	DNAJB6	DKFZp566D0824; HSJ-2; MGC117297; HSJ2; MRJ; HHDJ1; FLJ42837; MSJ-1; DnaJ; MGC1152	"A membrane-bounded organelle of eukaryotic cells in which chromosomes are housed and replicated. In most cells, the nucleus contains all of the cell's chromosomes except the organellar chromosomes, and is the site of RNA synthesis and processing. In some species, or in specialized cell types, RNA metabolism or DNA replication may be absent [goid 5634] [evidence IEA]; A membrane-bounded organelle…	"Functions to increase the rate of ATP hydrolysis [goid 1671] [pmid 11896048] [evidence IDA]; Interacting selectively with DNA (deoxyribonucleic acid) [goid 3677] [evidence IEA]; Any transcription regulator activity that prevents or downregulates transcription [goid 16564] [evidence IEA]; Interacting selectvely with a heat shock protein, any protein synthesized or activated in response to heat sh…	"The process of assisting in the covalent and noncovalent assembly of single chain polypeptides or multisubunit complexes into the correct tertiary structure [goid 6457] [pmid 11896048] [evidence IDA]; A change in state or activity of a cell or an organism (in terms of movement, secretion, enzyme production, gene expression, etc.) as a result of an unfolded protein stimulus [goid 6986] [evidence …	+	156902552-156902601	ILMN_1793770	GGATCTGCCGTTCATGTTGCTTTCTCCTTTGTCCTCTTGGACTTGAGGGC	2134	I	5860315	NP_490647.1	NM_058246.3	NM_058246.3	RefSeq	NM_058246.3	Homo sapiens	DNAJB6	DKFZp566D0824; HSJ-2; MGC117297; HSJ2; MRJ; HHDJ1; FLJ42837; MSJ-1; DnaJ; MGC1152	DNAJB6	ILMN_7651
2.50237	NM_005746.2	2230379	7	7q22.2c	"Homo sapiens nicotinamide phosphoribosyltransferase (NAMPT), mRNA."	10135	111161293	NAMPT	PBEF; MGC117256	"All of the contents of a cell excluding the plasma membrane and nucleus, but including other subcellular structures [goid 5737] [evidence IEA]; That part of the cytoplasm that does not contain membranous or particulate subcellular components [goid 5829] [pmid 8289818] [evidence EXP]"	"Functions to control the survival, growth, differentiation and effector function of tissues and cells [goid 5125] [pmid 8289818] [evidence TAS]; Catalysis of the transfer of a glycosyl group from one compound (donor) to another (acceptor) [goid 16757] [evidence IEA]; Catalysis of the reaction: pyrophosphate + nicotinamide nucleotide = PRPP + niacinamide [goid 47280] [evidence IEA]; Catalysis of …	"The cascade of processes by which a signal interacts with a receptor, causing a change in the level or activity of a second messenger or other downstream target, and ultimately effecting a change in the functioning of the cell [goid 7165] [pmid 8289818] [evidence TAS]; Any process that mediates the transfer of information from one cell to another [goid 7267] [pmid 8289818] [evidence TAS]; Any pr…	-	105893542-105893591	ILMN_1653871	CGTCTTCAAGGACCCAGTTGCTGATCCCAACAAAAGGTCCAAAAAGGGCC	1544	I	2230379	NP_005737.1	NM_005746.2	NM_005746.1	RefSeq	NM_005746.2	Homo sapiens	NAMPT	DKFZP666B131; PBEF; 1110035O14Rik; NAMPT; MGC117256	NAMPT	ILMN_170702
2.43207	NM_024513.1	6900278	3	3p21.31i	"Homo sapiens FYVE and coiled-coil domain containing 1 (FYCO1), mRNA."	79443	13470091	FYCO1	FLJ13335; RUFY3; ZFYVE7; MGC126517; MGC126519	"Penetrating at least one phospholipid bilayer of a membrane. May also refer to the state of being buried in the bilayer with no exposure outside the bilayer. When used to describe a protein, indicates that all or part of the peptide sequence is embedded in the membrane [goid 16021] [evidence IEA]"	Interacting selectively with zinc (Zn) ions [goid 8270] [evidence IEA]; Interacting selectively with any metal ion [goid 46872] [evidence IEA]	"The directed movement of substances (such as macromolecules, small molecules, ions) into, out of, within or between cells, or within a multicellular organism [goid 6810] [evidence IEA]"	-	45934659-45934708	ILMN_1709032	GAGACACTCTGCCTCTGGTGGCTGCAGAGCAATACCCAAGCCTCATTTGG	8188	S	6900278	NP_078789.1	NM_024513.1	NM_024513.1	RefSeq	NM_024513.1	Homo sapiens	FYCO1	FLJ13335; RUFY3; ZFYVE7; MGC126517; MGC126519	FYCO1	ILMN_18567
2.42335	NM_001013398.1	6840372	7	7p13b	"Homo sapiens insulin-like growth factor binding protein 3 (IGFBP3), transcript variant 1, mRNA."	3486	62243247	IGFBP3	BP-53; IBP3	"The space external to the outermost structure of a cell. For cells without external protective or external encapsulating structures this refers to space outside of the plasma membrane. This term covers the host cell environment outside an intracellular parasite [goid 5576] [pmid 14718574] [evidence NAS]; A membrane-bounded organelle of eukaryotic cells in which chromosomes are housed and replica…	"Increases the activity of a phosphatase, an enzyme which catalyzes of the removal of a phosphate group from a tyrosyl phenolic group of a protein [goid 8160] [pmid 11940579] [evidence IDA]; Interacting selectively with insulin-like growth factor I [goid 31994] [pmid 10766744] [evidence IPI]; Interacting selectively with any metal ion [goid 46872] [pmid 14576163] [evidence NAS]"	"Any process that modulates the frequency, rate or extent of cell growth [goid 1558] [evidence IEA]; Any process that stops, prevents or decreases the rate of addition of phosphate groups to amino acids within a protein [goid 1933] [pmid 17591901] [evidence IDA]; Any process that stops, prevents or reduces the frequency, rate or extent of signal transduction [goid 9968] [pmid 11940579] [evidence …	-	45991471-45991520	ILMN_2396875	CGGAGGCCAAACCCAAGAAGGTCTGGCAAAGTCAGGCTCAGGGAGACTCT	2283	A	6840372	NP_001013416.1	NM_001013398.1	NM_001013398.1	RefSeq	NM_001013398.1	Homo sapiens	IGFBP3	BP-53; IBP3	IGFBP3	ILMN_179464
2.406	NM_001024465.1	3890326	6	6q25.3f	"Homo sapiens superoxide dismutase 2, mitochondrial (SOD2), nuclear gene encoding mitochondrial protein, transcript variant 2, mRNA."	6648	67782306	SOD2	MNSOD; IPO-B; Mn-SOD	"A semiautonomous, self replicating organelle that occurs in varying numbers, shapes, and sizes in the cytoplasm of virtually all eukaryotic cells. It is notably the site of tissue respiration [goid 5739] [pmid 15087454] [evidence TAS]; The inner, i.e. lumen-facing, lipid bilayer of the mitochondrial envelope. It is highly folded to form cristae [goid 5743] [evidence IEA]; The gel-like material, …	"Catalysis of the reaction: 2 peroxide radical + 2 H+ = O2 + H2O2 [goid 4784] [pmid 14980699] [evidence IDA]; Catalysis of an oxidation-reduction (redox) reaction, a reversible chemical reaction in which the oxidation state of an atom or atoms within a molecule is altered. One substrate acts as a hydrogen or electron donor and becomes oxidized, while the other acts as hydrogen or electron accepto…	"A change in state or activity of a cell or an organism (in terms of movement, secretion, enzyme production, gene expression, etc.) as a result of a superoxide stimulus. Superoxide is the anion, oxygen-, formed by addition of one electron to dioxygen (O2) or any compound containing the superoxide anion [goid 303] [pmid 9462746] [evidence TAS]; A change in state or activity of a cell or an organis…	-	160103621-160103670	ILMN_2336781	GGCCTTATTCCACTGCTGGGGATTGATGTGTGGGAGCACGCTTACTACCT	677	A	3890326	NP_001019636.1	NM_001024465.1	NM_001024465.1	RefSeq	NM_001024465.1	Homo sapiens	SOD2	MNSOD; IPO-B; Mn-SOD	SOD2	ILMN_19760
2.33034	NM_032413.2	1110373	15	15q21.1a	"Homo sapiens chromosome 15 open reading frame 48 (C15orf48), transcript variant 2, mRNA."	84419	37694068	C15ORF48	FLJ22645; MGC32925; NMES1; FOAP-11				+	43512471-43512506:43512507-43512520	ILMN_1805410	GAAGAGTTGCAAAATGTCCAAAGGGTGACCAAATGACGAGCCCTCGCCTC	449	A	1110373	NP_115789.1	NM_032413.2	NM_032413.2	RefSeq	NM_032413.2	Homo sapiens	C15orf48	FLJ22645; MGC32925; NMES1; FOAP-11	C15ORF48	ILMN_2226
2.32705	NM_032412.3	4540241	5	5q31.3a	"Homo sapiens chromosome 5 open reading frame 32 (C5orf32), mRNA."	84418	110227863	C5ORF32					+	139554798-139554847	ILMN_1761566	GCCACCTCTGACAGGTGTGCCTGCCCCCATCTCTTCTGATTGCTGTTAAC	571	S	4540241	NP_115788.1	NM_032412.3	NM_032412.2	RefSeq	NM_032412.3	Homo sapiens	C5orf32	ORF1-FL49	C5ORF32	ILMN_11272
2.29274	NM_003155.2	2650730	8	8p21.2d	"Homo sapiens stanniocalcin 1 (STC1), mRNA."	6781	61676083	STC1	STC	"The space external to the outermost structure of a cell. For cells without external protective or external encapsulating structures this refers to space outside of the plasma membrane. This term covers the host cell environment outside an intracellular parasite [goid 5576] [evidence IEA]; That part of a multicellular organism outside the cells proper, usually taken to be outside the plasma membr…	"Catalysis of the phosphorylation of an amino acid residue in a protein, usually according to the reaction: a protein + ATP = a phosphoprotein + ADP [goid 4672] [evidence IEA]; The action characteristic of a hormone, any substance formed in very small amounts in one specialized organ or group of cells and carried (sometimes in the bloodstream) to another organ or group of cells in the same organi…	"The process of introducing a phosphate group on to a protein [goid 6468] [evidence IEA]; The regulation of the levels, transport, and metabolism of calcium ions within a cell or between a cell and its external environment [goid 6874] [pmid 8700837] [evidence TAS]; Any series of molecular signals initiated by the binding of an extracellular ligand to a receptor on the surface of the target cell […	-	23755720-23755769	ILMN_1758164	CCAAAGCTTCGTCTTGTGTTTGCTGCAGAGTGATTCGGGGGCTGACCTAG	3486	S	2650730	NP_003146.1	NM_003155.2	NM_003155.2	RefSeq	NM_003155.2	Homo sapiens	STC1	STC	STC1	ILMN_16225
2.28955	XM_941665.2	2710064		11p11.2e	"PREDICTED: Homo sapiens hypothetical LOC387763 (LOC387763), mRNA."	387763	113422827	LOC387763							ILMN_1677402	CCCCAGCGCACACCCATTCACACTCACGCCAACACTCTCGCTGAACACTT	1672	A	2710064	XP_946758.2	XM_941665.2	XM_373497.4	RefSeq	XM_941665.2	Homo sapiens	LOC387763		LOC387763	ILMN_43061
2.27398	NM_001002236.1	730047	14	14q32.13a	"Homo sapiens serpin peptidase inhibitor, clade A (alpha-1 antiproteinase, antitrypsin), member 1 (SERPINA1), transcript variant 2, mRNA."	5265	50363218	SERPINA1	PI1; MGC23330; PRO2275; A1AT; AAT; MGC9222; PI; A1A	"The space external to the outermost structure of a cell. For cells without external protective or external encapsulating structures this refers to space outside of the plasma membrane. This term covers the host cell environment outside an intracellular parasite [goid 5576] [pmid 14718574] [evidence NAS]; The space external to the outermost structure of a cell. For cells without external protecti…	"Stops, prevents or reduces the activity of serine-type endopeptidases, enzymes that catalyze the hydrolysis of nonterminal peptide bonds in a polypeptide chain; a serine residue (and a histidine residue) are at the active center of the enzyme [goid 4867] [pmid 12878203] [evidence NAS]; Interacting selectively with any protein or protein complex (a complex of two or more proteins that may include…	"Process involving non-antibody proteins whose concentrations in the plasma increase in response to infection or injury of homeothermic animals [goid 6953] [evidence IEA]; The sequential process by which the multiple coagulation factors of the blood interact, ultimately resulting in the formation of an insoluble fibrin clot; it may be divided into three stages: stage 1, the formation of intrinsic…	-	93916997-93917046	ILMN_2338452	CCTGCCTGATGAGGGGAAACTACAGCACCTGGAAAATGAACTCACCCACG	1385	A	730047	NP_001002236.1	NM_001002236.1	NM_001002236.1	RefSeq	NM_001002236.1	Homo sapiens	SERPINA1	PI1; MGC23330; PRO2275; A1AT; AAT; MGC9222; PI; A1A	SERPINA1	ILMN_30268
2.27356	NM_004331.2	620047	8	8p21.2b	"Homo sapiens BCL2/adenovirus E1B 19kDa interacting protein 3-like (BNIP3L), mRNA."	665	47078259	BNIP3L	BNIP3a; NIX	"A membrane-bounded organelle of eukaryotic cells in which chromosomes are housed and replicated. In most cells, the nucleus contains all of the cell's chromosomes except the organellar chromosomes, and is the site of RNA synthesis and processing. In some species, or in specialized cell types, RNA metabolism or DNA replication may be absent [goid 5634] [evidence IEA]; The double lipid bilayer enc…	Interacting selectively with lamin; any of a group of intermediate-filament proteins that form the fibrous matrix on the inner surface of the nuclear envelope [goid 5521] [pmid 10381623] [evidence IDA]; Interacting selectively with an identical protein to form a homodimer [goid 42803] [pmid 10381623] [evidence IDA]; Interacting selectively with a nonidentical protein to form a heterodimer [goid 4…	"A process that directly activates any of the steps required for cell death by apoptosis [goid 6917] [pmid 9973195] [evidence IDA]; Any process that stops, prevents or reduces the frequency, rate or extent of survival gene product expression; survival gene products are those that antagonize the apoptotic program. Regulation can be at the transcriptional, translational, or posttranslational level …	+	26270364-26270413	ILMN_2045419	GAGCAAAACTGCACAAACTTGCACATTGGAAAGTGCAACAAGTTCCCGTG	3220	S	620047	NP_004322.1	NM_004331.2	NM_004331.2	RefSeq	NM_004331.2	Homo sapiens	BNIP3L	BNIP3a; NIX	BNIP3L	ILMN_13842
2.20689	NM_173647.2	990735	2	2q11.2e	"Homo sapiens ring finger protein 149 (RNF149), mRNA."	284996	31543079	RNF149	FLJ90504; DNAPTP2	"All of the contents of a cell excluding the plasma membrane and nucleus, but including other subcellular structures [goid 5737] [pmid 18029348] [evidence IDA]; The membrane surrounding a cell that separates the cell from its external environment. It consists of a phospholipid bilayer and associated proteins [goid 5886] [pmid 18029348] [evidence IDA]; Penetrating at least one phospholipid bilayer…	"Interacting selectively with any protein or protein complex (a complex of two or more proteins that may include other nonprotein molecules) [goid 5515] [evidence IEA]; Interacting selectively with zinc (Zn) ions [goid 8270] [evidence IEA]; Catalysis of the ligation of two substances with concomitant breaking of a diphosphate linkage, usually in a nucleoside triphosphate. Ligase is the systematic…	"The chemical reactions and pathways resulting in the breakdown of a protein or peptide by hydrolysis of its peptide bonds, initiated by the covalent attachment of a ubiquitin moiety, or multiple ubiquitin moieties, to the protein [goid 6511] [evidence IEA]"	-	101893040-101893089	ILMN_1665877	CCCTTTATTGCCTCATTTCTTGTGACGCCTTGTTGGGGAGGGAAATCTGT	1915	S	990735	NP_775918.1	NM_173647.2	NM_173647.2	RefSeq	NM_173647.2	Homo sapiens	RNF149	FLJ90504; DNAPTP2	RNF149	ILMN_10320
2.20542	NM_023072.1	1170072	19	19p13.13a-p13.12c	"Homo sapiens zinc finger, SWIM-type containing 4 (ZSWIM4), mRNA."	65249	65301125	ZSWIM4			Interacting selectively with zinc (Zn) ions [goid 8270] [evidence IEA]; Interacting selectively with any metal ion [goid 46872] [evidence IEA]		+	13803992-13804041	ILMN_2150654	GAGACTGGGGTGCATCTCCAGAGCCACTCACACCCTCAACCTCGTTTCCT	4287	S	1170072	NP_075560.1	NM_023072.1	NM_023072.1	RefSeq	NM_023072.1	Homo sapiens	ZSWIM4		ZSWIM4	ILMN_167043
2.18922	NM_033161.2	3370048	9	9q34.2a	"Homo sapiens surfeit 4 (SURF4), mRNA."	6836	19593984	SURF4	FLJ22993; ERV29; MGC102753	"The irregular network of unit membranes, visible only by electron microscopy, that occurs in the cytoplasm of many eukaryotic cells. The membranes form a complex meshwork of tubular channels, which are often expanded into slitlike cavities called cisternae. The ER takes two forms, rough (or granular), with ribosomes adhering to the outer surface, and smooth (with no ribosomes attached) [goid 578…	"Elemental activities, such as catalysis or binding, describing the actions of a gene product at the molecular level. A given gene product may exhibit one or more molecular functions [goid 3674] [evidence ND ]"	"Any process specifically pertinent to the functioning of integrated living units: cells, tissues, organs, and organisms. A process is a collection of molecular events with a defined beginning and end [goid 8150] [evidence ND ]"	-	136228734-136228783	ILMN_1690761	TCAACCTCACCAGGGCTGTCTCTTGGTCCACACCTCGCTCCCTGTTAGTG	2525	S	3370048	NP_149351.1	NM_033161.2	NM_033161.2	RefSeq	NM_033161.2	Homo sapiens	SURF4	FLJ22993; ERV29; MGC102753	SURF4	ILMN_1760
2.17945	NM_198925.1	5080280	15	15q26.1b	"Homo sapiens sema domain, immunoglobulin domain (Ig), transmembrane domain (TM) and short cytoplasmic domain, (semaphorin) 4B (SEMA4B), transcript variant 2, mRNA."	10509	39777609	SEMA4B	KIAA1745; SemC; SEMAC; MGC131831	"Double layer of lipid molecules that encloses all cells, and, in eukaryotes, many organelles; may be a single or double lipid bilayer; also includes associated proteins [goid 16020] [evidence IEA]; Penetrating at least one phospholipid bilayer of a membrane. May also refer to the state of being buried in the bilayer with no exposure outside the bilayer. When used to describe a protein, indicates…	Combining with an extracellular or intracellular messenger to initiate a change in cell activity [goid 4872] [evidence IEA]; Combining with an extracellular or intracellular messenger to initiate a change in cell activity [goid 4872] [evidence IEA]	"The biological process whose specific outcome is the progression of a multicellular organism over time from an initial condition (e.g. a zygote or a young adult) to a later condition (e.g. a multicellular animal or an aged adult) [goid 7275] [evidence IEA]; The process whose specific outcome is the progression of nervous tissue over time, from its formation to its mature state [goid 7399] [evide…	+	88573628-88573677	ILMN_1672589	TGCCTTCCTCCGTTGTTGCGTGAGAACCCGTGTGCCCCTTCCCACCATAT	3512	A	5080280	NP_945119.1	NM_198925.1	NM_020210.2	RefSeq	NM_198925.1	Homo sapiens	SEMA4B	KIAA1745; SemC; SEMAC; MGC131831	SEMA4B	ILMN_25258
2.16528	NR_031738.1	2260349			"Homo sapiens microRNA 1974 (MIR1974), microRNA."	100302207	269847664	MIR1974							ILMN_3308961	ACAACGATGGTTTTTCATATCATTGGTCGTGGTTGTAGTCCGTGCGAGAA	18	S	2260349		NR_031738.1	NR_031738.1	RefSeq	NR_031738.1	Homo sapiens	MIR1974		MIR1974	ILMN_388657
2.15705	NM_002204.1	2000368	17	17q21.33a	"Homo sapiens integrin, alpha 3 (antigen CD49C, alpha 3 subunit of VLA-3 receptor) (ITGA3), transcript variant a, mRNA."	3675	4504746	ITGA3	GAP-B3; FLJ34704; VLA3a; VL3A; MSK18; VCA-2; FLJ34631; GAPB3; CD49C	"The membrane surrounding a cell that separates the cell from its external environment. It consists of a phospholipid bilayer and associated proteins [goid 5886] [evidence IEA]; A protein complex that is composed of one alpha subunit and one beta subunit, both of which are members of the integrin superfamily of cell adhesion receptors; the complex spans the plasma membrane and binds to extracellu…	Combining with an extracellular or intracellular messenger to initiate a change in cell activity [goid 4872] [evidence IEA]; Interacting selectively with calcium ions (Ca2+) [goid 5509] [evidence IEA]; Interacting selectively with any protein or protein complex (a complex of two or more proteins that may include other nonprotein molecules) [goid 5515] [pmid 14676841] [evidence IPI]	"The characteristic movement of immature neurons from germinal zones to specific positions where they will reside as they mature [goid 1764] [evidence IEA]; The attachment of a cell, either to another cell or to an underlying substrate such as the extracellular matrix, via cell adhesion molecules [goid 7155] [evidence IEA]; The binding of a cell to the extracellular matrix via adhesion molecules …	+	45522680-45522729	ILMN_1685397	GAGAAGCTGAGGCTAGTTCCAAAAACCTCTCCTGACCCCTGCCTGTTGGC	4468	A	2000368	NP_002195.1	NM_002204.1	NM_002204.1	RefSeq	NM_002204.1	Homo sapiens	ITGA3	GAP-B3; FLJ34704; VLA3a; VL3A; MSK18; VCA-2; FLJ34631; GAPB3; CD49C	ITGA3	ILMN_11442
2.13891	NM_001001870.1	5290161	17	17p13.3d	"Homo sapiens chromosome 17 open reading frame 91 (C17orf91), transcript variant 2, mRNA."	84981	49355753	C17ORF91	DKFZp686O06159; MGC14376; MGC149751				-	1561813-1561862	ILMN_2390310	CTCCATCCAGATGGTGGAGTACCGCGCAGACATTAAAAGTCATGTAAAAG	975	A	5290161	NP_001001870.1	NM_001001870.1	NM_001001870.1	RefSeq	NM_001001870.1	Homo sapiens	C17orf91	DKFZp686O06159; MGC14376; MGC149751	C17ORF91	ILMN_17772
2.12266	NM_002256.3	5820189	1	1q32.1f	"Homo sapiens KiSS-1 metastasis-suppressor (KISS1), mRNA."	3814	116829963	KISS1	MGC39258; KiSS-1	The space external to the outermost structure of a cell. For cells without external protective or external encapsulating structures this refers to space outside of the plasma membrane. This term covers the host cell environment outside an intracellular parasite [goid 5576] [evidence IEA]	Interacting selectively with any protein or protein complex (a complex of two or more proteins that may include other nonprotein molecules) [goid 5515] [pmid 11387329] [evidence IPI]	"A process that is carried out at the cellular level which results in the formation, arrangement of constituent parts, or disassembly of cytoskeletal structures [goid 7010] [pmid 9192814] [evidence TAS]"	-	204159678-204159727	ILMN_1669404	GTGCTGGTGCAGCGGGAGAAGGACCTGCCGAACTACAACTGGAACTCCTT	455	S	5820189	NP_002247.3	NM_002256.3	NM_002256.2	RefSeq	NM_002256.3	Homo sapiens	KISS1	MGC39258; KiSS-1	KISS1	ILMN_21021
2.12211	NM_024843.2	2450465	2	2q31.1c	"Homo sapiens cytochrome b reductase 1 (CYBRD1), mRNA."	79901	19923602	CYBRD1	FLJ23462; FRRS3; DCYTB	"Double layer of lipid molecules that encloses all cells, and, in eukaryotes, many organelles; may be a single or double lipid bilayer; also includes associated proteins [goid 16020] [evidence IEA]; Penetrating at least one phospholipid bilayer of a membrane. May also refer to the state of being buried in the bilayer with no exposure outside the bilayer. When used to describe a protein, indicates…	"Catalysis of the reaction: 2 Fe2+ + NAD+ = 2 Fe3+ + NADH + H+ [goid 293] [pmid 14499595] [evidence IDA]; Interacting selectively with iron (Fe) ions [goid 5506] [evidence IEA]; Catalysis of an oxidation-reduction (redox) reaction, a reversible chemical reaction in which the oxidation state of an atom or atoms within a molecule is altered. One substrate acts as a hydrogen or electron donor and be…	"The directed movement of substances (such as macromolecules, small molecules, ions) into, out of, within or between cells, or within a multicellular organism [goid 6810] [evidence IEA]; A process whereby a series of electron carriers operate together to transfer electrons from donors to any of several different terminal electron acceptors to generate a transmembrane electrochemical gradient [goi…	+	172122506-172122555	ILMN_2087692	CCCCTGCTGAGTTGGAAATTCCAGTGCAGCACTGATTGACCACAGTTGCC	3857	S	2450465	NP_079119.2	NM_024843.2	NM_024843.2	RefSeq	NM_024843.2	Homo sapiens	CYBRD1	FLJ23462; FRRS3; DCYTB	CYBRD1	ILMN_4649
2.11936	NM_005228.3	1050671	7	7p11.2c	"Homo sapiens epidermal growth factor receptor (erythroblastic leukemia viral (v-erb-b) oncogene homolog, avian) (EGFR), transcript variant 1, mRNA."	1956	41327737	EGFR	ERBB1; HER1; ERBB; mENA; PIG61	"The space external to the outermost structure of a cell. For cells without external protective or external encapsulating structures this refers to space outside of the plasma membrane. This term covers the host cell environment outside an intracellular parasite [goid 5576] [evidence IEA]; That part of a multicellular organism outside the cells proper, usually taken to be outside the plasma membr…	"Interacting selectively with a nucleotide, any compound consisting of a nucleoside that is esterified with (ortho)phosphate or an oligophosphate at any hydroxyl group on the ribose or deoxyribose moiety [goid 166] [evidence IEA]; Interacting selectively with double-stranded DNA [goid 3690] [pmid 6325948] [evidence NAS]; [goid 4710] [pmid 15542601] [evidence NAS]; Combining with an extracellular …	"The formation of bone or of a bony substance, or the conversion of fibrous tissue or of cartilage into bone or a bony substance [goid 1503] [pmid 12925580] [evidence NAS]; A change in state or activity of a cell or an organism (in terms of movement, secretion, enzyme production, gene expression, etc.) as a result of a disturbance in organismal or cellular homeostasis, usually, but not necessaril…	+	55235578-55235600:55236375-55236401	ILMN_1798975	TAGGAGCCCACCTTTTTTCCTAATCTGTGTGTGCCCTGTAACCTGACTGG	5296	I	1050671	NP_005219.2	NM_005228.3	NM_005228.3	RefSeq	NM_005228.3	Homo sapiens	EGFR	ERBB1; ERBB; mENA	EGFR	ILMN_164647
2.10397	NM_006216.2	5080192	2	2q36.1d	"Homo sapiens serpin peptidase inhibitor, clade E (nexin, plasminogen activator inhibitor type 1), member 2 (SERPINE2), mRNA."	5270	34147323	SERPINE2	PI7; GDN; PNI; PN1	The space external to the outermost structure of a cell. For cells without external protective or external encapsulating structures this refers to space outside of the plasma membrane. This term covers the host cell environment outside an intracellular parasite [goid 5576] [pmid 3997857] [evidence NAS]; The space external to the outermost structure of a cell. For cells without external protective…	"Stops, prevents or reduces the activity of serine-type endopeptidases, enzymes that catalyze the hydrolysis of nonterminal peptide bonds in a polypeptide chain; a serine residue (and a histidine residue) are at the active center of the enzyme [goid 4867] [pmid 3997857] [evidence NAS]; Stops, prevents or reduces the activity of serine-type endopeptidases, enzymes that catalyze the hydrolysis of n…	"The biological process whose specific outcome is the progression of a multicellular organism over time from an initial condition (e.g. a zygote or a young adult) to a later condition (e.g. a multicellular animal or an aged adult) [goid 7275] [evidence IEA]; The process whose specific outcome is the progression of nervous tissue over time, from its formation to its mature state [goid 7399] [evide…	-	224548185-224548234	ILMN_1655595	GTCTTGCTAGACAAGGTTGCTGTTGTGCAGTGTGCCTGTCACTACTGGTC	1990	S	5080192	NP_006207.1	NM_006216.2	NM_006216.2	RefSeq	NM_006216.2	Homo sapiens	SERPINE2	PI7; GDN; PNI; PN1	SERPINE2	ILMN_1946
2.10108	NM_004419.3	5390161	10	10q25.2a	"Homo sapiens dual specificity phosphatase 5 (DUSP5), mRNA."	1847	62865889	DUSP5	HVH3; DUSP	"A membrane-bounded organelle of eukaryotic cells in which chromosomes are housed and replicated. In most cells, the nucleus contains all of the cell's chromosomes except the organellar chromosomes, and is the site of RNA synthesis and processing. In some species, or in specialized cell types, RNA metabolism or DNA replication may be absent [goid 5634] [evidence IEA]"	"Catalysis of the reaction: protein tyrosine phosphate + H2O = protein tyrosine + phosphate [goid 4725] [pmid 7961985] [evidence TAS]; Catalysis of the hydrolysis of various bonds, e.g. C-O, C-N, C-C, phosphoric anhydride bonds, etc. Hydrolase is the systematic name for any enzyme of EC class 3 [goid 16787] [evidence IEA]; Catalysis of the reaction: MAP kinase serine/threonine/tyrosine phosphate …	The process of removing one or more phosphoric residues from a protein [goid 6470] [pmid 7961985] [evidence TAS]	+	112260431-112260480	ILMN_1656501	CTCCCTGCCCCTGGAGGTTGTCTTCAAGCTGTGGACTTCTGGGATTTGCA	2301	S	5390161	NP_004410.3	NM_004419.3	NM_004419.3	RefSeq	NM_004419.3	Homo sapiens	DUSP5	HVH3; DUSP	DUSP5	ILMN_166000
2.09858	NM_198793.2	4150193	3	3q13.12b	"Homo sapiens CD47 molecule (CD47), transcript variant 2, mRNA."	961	68223313	CD47	MER6; OA3; IAP	The membrane surrounding a cell that separates the cell from its external environment. It consists of a phospholipid bilayer and associated proteins [goid 5886] [pmid 16691243] [evidence EXP]; The membrane surrounding a cell that separates the cell from its external environment. It consists of a phospholipid bilayer and associated proteins [goid 5886] [pmid 10429193] [evidence TAS]; Penetrating a…	Interacting selectively with any protein or protein complex (a complex of two or more proteins that may include other nonprotein molecules) [goid 5515] [pmid 15383453] [evidence IPI]	"The attachment of a cell, either to another cell or to an underlying substrate such as the extracellular matrix, via cell adhesion molecules [goid 7155] [evidence IEA]; Any series of molecular signals generated as a consequence of an integrin binding to one of its physiological ligands [goid 7229] [pmid 8294396] [evidence TAS]; Any process that activates or increases the rate or extent of cell p…	-	109245076-109245125	ILMN_1771333	CTCCAGTGTTGCTATGTGCAAGATCCTCTCTTGGAGCTTTTTTGCATAGC	4793	A	4150193	NP_942088.1	NM_198793.2	NM_001025080.1	RefSeq	NM_198793.2	Homo sapiens	CD47	OA3; MER6; IAP	CD47	ILMN_23203
2.09042	NM_001002235.1	6380484	14	14q32.13a	"Homo sapiens serpin peptidase inhibitor, clade A (alpha-1 antiproteinase, antitrypsin), member 1 (SERPINA1), transcript variant 3, mRNA."	5265	50363220	SERPINA1	PI1; MGC23330; PRO2275; A1AT; AAT; MGC9222; PI; A1A	"The space external to the outermost structure of a cell. For cells without external protective or external encapsulating structures this refers to space outside of the plasma membrane. This term covers the host cell environment outside an intracellular parasite [goid 5576] [pmid 14718574] [evidence NAS]; The space external to the outermost structure of a cell. For cells without external protecti…	"Stops, prevents or reduces the activity of serine-type endopeptidases, enzymes that catalyze the hydrolysis of nonterminal peptide bonds in a polypeptide chain; a serine residue (and a histidine residue) are at the active center of the enzyme [goid 4867] [pmid 12878203] [evidence NAS]; Interacting selectively with any protein or protein complex (a complex of two or more proteins that may include…	"Process involving non-antibody proteins whose concentrations in the plasma increase in response to infection or injury of homeothermic animals [goid 6953] [evidence IEA]; The sequential process by which the multiple coagulation factors of the blood interact, ultimately resulting in the formation of an insoluble fibrin clot; it may be divided into three stages: stage 1, the formation of intrinsic…	-	93914546-93914595	ILMN_2404154	ACAAAATACCAAGTCTCCCCTCTTCATGGGAAAAGTGGTGAATCCCACCC	1440	A	6380484	NP_001002235.1	NM_001002235.1	NM_001002235.1	RefSeq	NM_001002235.1	Homo sapiens	SERPINA1	PI1; MGC23330; PRO2275; A1AT; AAT; MGC9222; PI; A1A	SERPINA1	ILMN_913
2.08509	NM_145011.2	6840112	10	10p11.21a	"Homo sapiens zinc finger protein 25 (ZNF25), mRNA."	219749	24462252	ZNF25	DKFZp564C206; KOX19; Zfp9; FLJ31890	"The living contents of a cell; the matter contained within (but not including) the plasma membrane, usually taken to exclude large vacuoles and masses of secretory or ingested material. In eukaryotes it includes the nucleus and cytoplasm [goid 5622] [evidence IEA]; A membrane-bounded organelle of eukaryotic cells in which chromosomes are housed and replicated. In most cells, the nucleus contains…	Interacting selectively with DNA (deoxyribonucleic acid) [goid 3677] [evidence IEA]; Interacting selectively with zinc (Zn) ions [goid 8270] [evidence IEA]; Interacting selectively with any metal ion [goid 46872] [evidence IEA]	"The synthesis of either RNA on a template of DNA or DNA on a template of RNA [goid 6350] [evidence IEA]; Any process that modulates the frequency, rate or extent of DNA-dependent transcription [goid 6355] [evidence IEA]"	-	38279101-38279150	ILMN_1808765	CCCCAGCAGAGTTGAGTAGTTGTAGCAGACACCACATGCCCTTGAGCCTA	3386	S	6840112	NP_659448.1	NM_145011.2	NM_145011.2	RefSeq	NM_145011.2	Homo sapiens	ZNF25	DKFZp564C206; KOX19; Zfp9; FLJ31890	ZNF25	ILMN_7672
2.07699	XM_001720850.1	3450288			"PREDICTED: Homo sapiens similar to peroxidasin homolog (LOC100134134), mRNA."	100134134	169163582	LOC100134134							ILMN_3237946	GGAGCTCAAGTGTCGGGAACTGTCTAACTTCAGGTTGTGTGAGTGCGTTA	3568	S	3450288	XP_001720902.1	XM_001720850.1	XM_001720850.1	RefSeq	XM_001720850.1	Homo sapiens	LOC100134134		LOC100134134	ILMN_337630
2.07164	NM_001135095.1	6060440	3	3q26.31a	"Homo sapiens fibronectin type III domain containing 3B (FNDC3B), transcript variant 2, mRNA."	64778	205360933	FNDC3B		"The irregular network of unit membranes, visible only by electron microscopy, that occurs in the cytoplasm of many eukaryotic cells. The membranes form a complex meshwork of tubular channels, which are often expanded into slitlike cavities called cisternae. The ER takes two forms, rough (or granular), with ribosomes adhering to the outer surface, and smooth (with no ribosomes attached) [goid 578…		"Any process that activates or increases the frequency, rate or extent of adipocyte differentiation [goid 45600] [evidence IEA]"	+	172118002-172118051	ILMN_3178302	CCCTGGCACAAGAAATTCCAGTCATGTGAAGCAAACTGCCCTTTGTCCTC	6451	A	6060440	NP_001128567.1	NM_001135095.1	NM_001135095.1	RefSeq	NM_001135095.1	Homo sapiens	FNDC3B		FNDC3B	ILMN_364046
2.06888	NM_017983.4	3400598		17q24.2c	"Homo sapiens WD repeat domain, phosphoinositide interacting 1 (WIPI1), mRNA."	55062	141802800	WIPI1	WIPI49; Atg18; FLJ10055	"The lipid bilayer surrounding an autophagic vacuole, a double-membrane-bounded vesicle in which endogenous cellular material is sequestered [goid 421] [pmid 17618624] [evidence IDA]; All of the contents of a cell excluding the plasma membrane and nucleus, but including other subcellular structures [goid 5737] [pmid 17618624] [evidence IDA]; A membrane-bounded organelle that carries materials new…	"Interacting selectively with one or more specific sites on a receptor molecule, a macromolecule that undergoes combination with a hormone, neurotransmitter, drug or intracellular messenger to initiate a change in cell function [goid 5102] [pmid 15602573] [evidence IDA]; Interacting selectively with an estrogen receptor [goid 30331] [pmid 15602573] [evidence IDA]; Interacting selectively with pho…	The process by which cells digest parts of their own cytoplasm; allows for both recycling of macromolecular constituents under conditions of cellular stress and remodeling the intracellular structure for cell differentiation [goid 6914] [pmid 15602573] [evidence IEP]; The process by which cells digest parts of their own cytoplasm; allows for both recycling of macromolecular constituents under con…			ILMN_1781386	ACCTGGTTAACTCCTCACCAAGCTTCCCACGACCCTGGTTGCCAATGGGC	1527	S	3400598	NP_060453.2	NM_017983.4	NM_017983.3	RefSeq	NM_017983.4	Homo sapiens	WIPI1	WIPI49; FLJ10055; Atg18	WIPI1	ILMN_19646
[truncated: 273 more rows]

## Sheet: TABLE S1C - HRD GENE OVERLAP
TABLE S1C: Venn Diagram showing overlapping genes between published HR Deficiency Gene Signature in MCF10A versus altered genes in K-H deficient MDA-MB-231 cells.
Names	total	unique elements			Names	total	unique elements			Names	total	unique elements
[truncated: 501 more rows]

## Sheet: TABLE S1D - PATHWAY ANALYSIS
TABLE S1D: DAVID Pathway Analyses of 50 Overlapping genes in Table S1C
[truncated: 7 more rows]
